# Supplementary material for: Design, Synthesis, Molecular Docking Study and Biological Evaluation of Novel γ-Carboline Derivatives of Latrepirdine (Dimebon) as Potent Anticancer Agents
Source: MDPI journal article supplement (doi:10.3390/molecules28134965), 2023-06-24
Supplement: s1 [file s1]

# Design, Synthesis, Molecular Docking Study and Biological Evaluation of Novel $\gamma$ -Carboline Derivatives of Latrepirdine (Dimebon) as a Potent Anticancer Agents

Ramakrishna Voggu<sup>a, b</sup>, Arundhati Karmakar,<sup>c</sup> Venkat Swamy Puli<sup>a</sup>, V. Surendra Babu Damerla<sup>a</sup>, Padma Mogili<sup>b</sup>, P. Amaladass<sup>d</sup>, Sridhar Chidara<sup>a, \*</sup>, Kalyan Kumar Pasunooti<sup>e, f, \*</sup>, Sarika Gupta<sup>c, \*</sup>

<sup>a</sup> Department of Medicinal Chemistry, Aragen Life Sciences Pvt. Ltd. (Formerly known as GVK Biosciences Pvt. Ltd.), IDA, Nacharam, Hyderabad, Telangana, 500076, India

<sup>b</sup> Department of Engineering Chemistry, Andhra University, Visakhapatnam, A.P., 530003, India

<sup>c</sup> Molecular Science Laboratory, National Institute of Immunology, New Delhi 110067, India

<sup>d</sup> Department of Chemistry, Madanapalle Institute of Technology & Science, Madanapalle, Andhra Pradesh, 517325, India.

<sup>e</sup> ProSAM Bioscience Pvt. Ltd., Hyderabad, Telangana, 500049, India.

<sup>f</sup> Department of Pharmacology and Molecular Sciences, Johns Hopkins School of Medicine, Baltimore, Maryland 21205, United States

\* Corresponding author.

E-mail address: sarika@nii.ac.in (S. Gupta) and kpasuno1@jhmi.edu (K K Pasunooti)

## List of Contents

1) <sup>1</sup>H NMR, <sup>13</sup>C NMR, <sup>19</sup>F NMR, Mass spectra and Elemental composition analysis reports of obtained compounds (6, 7, 9, LP-1 to LP-16).

GV-RV-imine

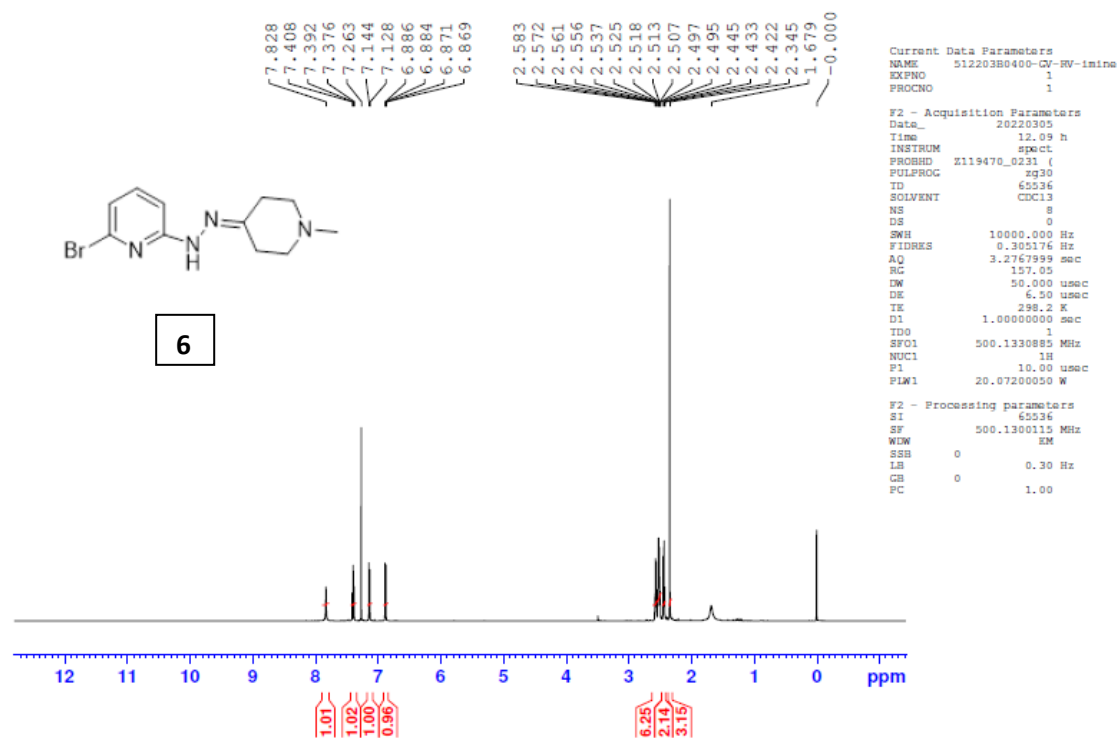

**<sup>1</sup>H NMR spectrum of 2-bromo-6-(2-(1-methylpiperidin-4-ylidene)hydrazinyl)pyridine (6) in CDCl<sub>3</sub> (500 MHz)**

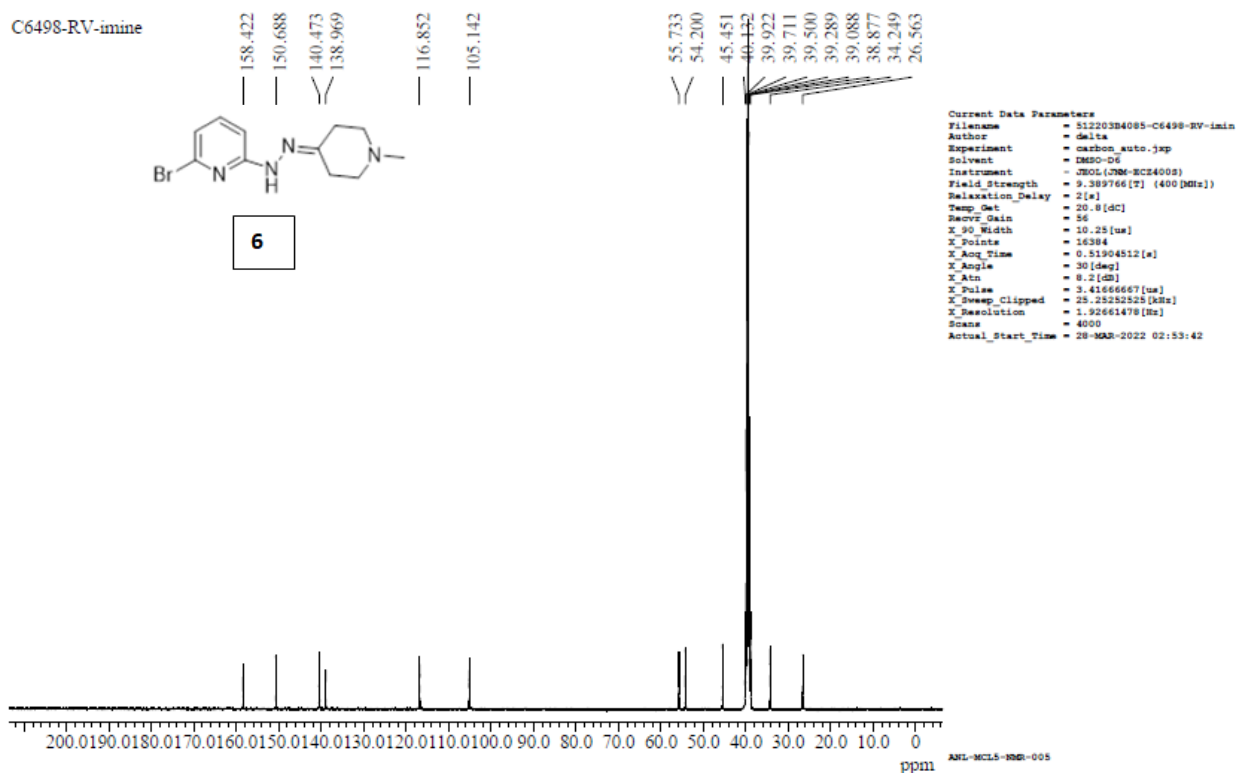

**<sup>13</sup>C NMR spectrum of 2-bromo-6-(2-(1-methylpiperidin-4-ylidene)hydrazinyl)pyridine (6) in DMSO (125 MHz)**

SAMPLE CODE: C6498-GV-RV-imine  
Acq. Method: ARAGEN\_LCMS\_171

Aragen Life Sciences Private Limited  
Analytical-Discovery Chemistry

Date of Analysis: 07-Mar-2022 23:47  
Instrument ID: ANL-MCL5-LCMS-011

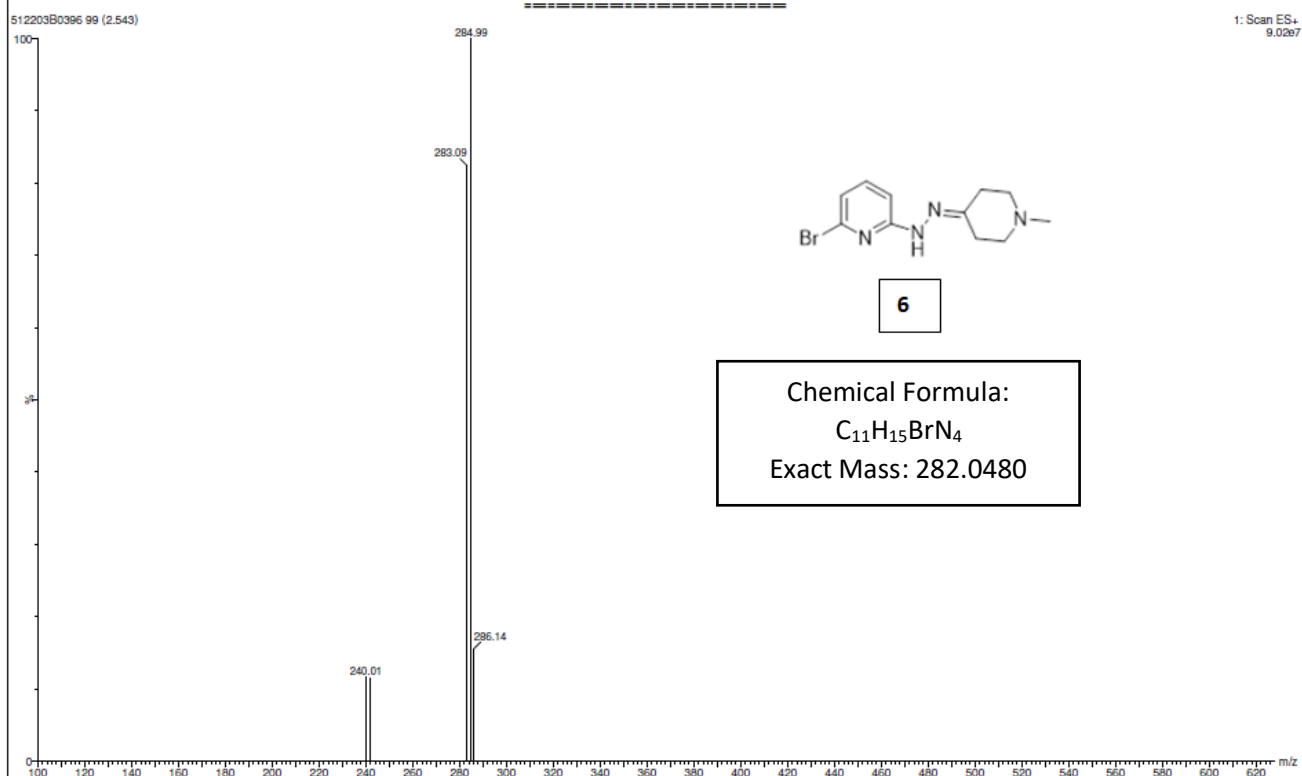

## Mass spectrum of 2-bromo-6-(2-(1-methylpiperidin-4-ylidene)hydrazinyl)pyridine (6)

### Elemental Composition Report

Page 1

#### Single Mass Analysis

Tolerance = 820.0 PPM / DBE: min = -1.5, max = 50.0

Element prediction: Off

Number of isotope peaks used for i-FIT = 3

Monoisotopic Mass, Even Electron Ions

9 formula(e) evaluated with 1 results within limits (up to 50 best isotopic matches for each mass)

Elements Used:

C: 0-11 H: 0-16 N: 0-4 Br: 0-1

C6498-imine  
Acq. method formic acid\_4min

Aragen Life sciences Private Limited  
Analytical-Discovery Chemistry

06-Sep-2022  
21:54:57

INSTRUMENT-ID: ANL-MCL5-LCMS-013

512209B4294 44 (1.121)

1: Scan ES+  
2.92e+007

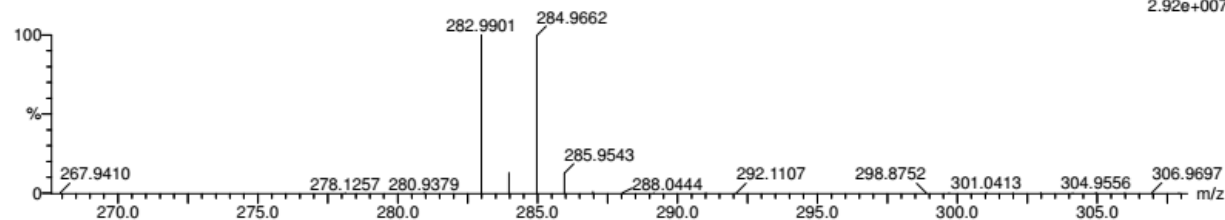

Minimum: -1.5  
Maximum: 5.0 820.0 50.0

| Mass     | Calc. Mass | mDa  | PPM   | DBE | i-FIT | Norm | Conf (%) | Formula       |
|----------|------------|------|-------|-----|-------|------|----------|---------------|
| 283.0528 | 283.0558   | -3.0 | -10.6 | 5.5 | 44.4  | n/a  | n/a      | C11 H16 N4 Br |

## Elemental composition report of 2-bromo-6-(2-(1-methylpiperidin-4-ylidene)hydrazinyl)pyridine (6)

GV-RV-1A

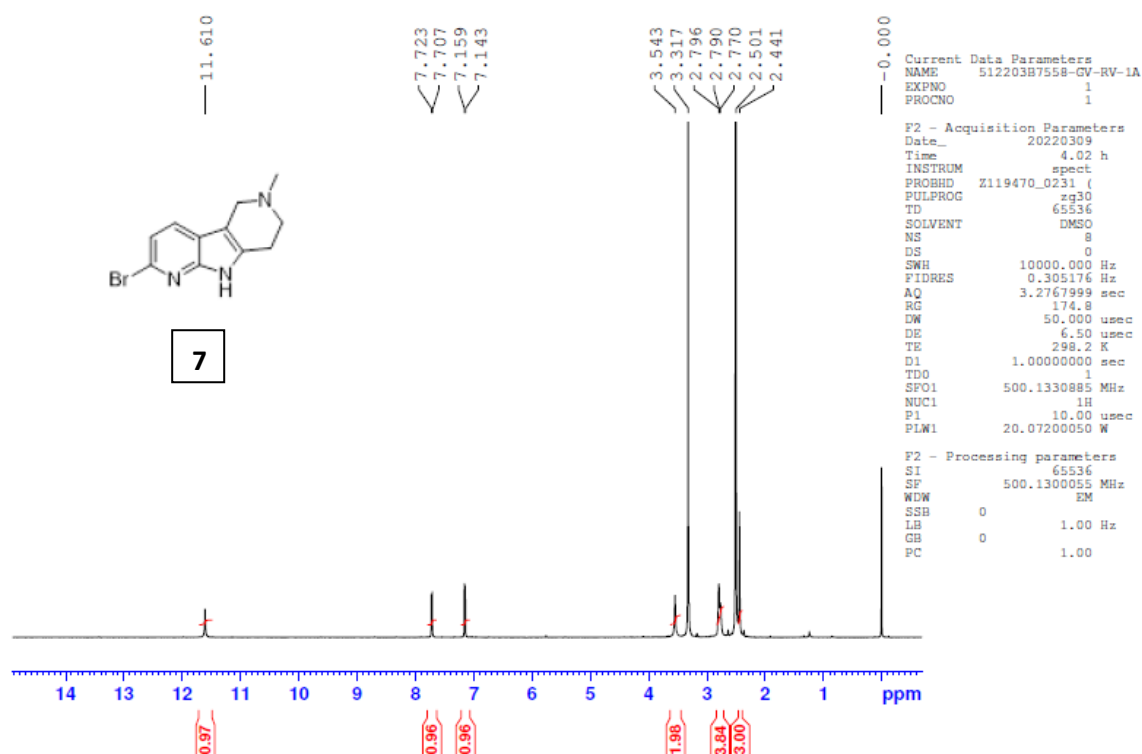

<sup>1</sup>H NMR spectrum of 2-bromo-6-methyl-6,7,8,9-tetrahydro-5H-pyrrolo[2,3-b:4,5-c']dipyridine (7) in DMSO (500 MHz)

C6498-RV-1A

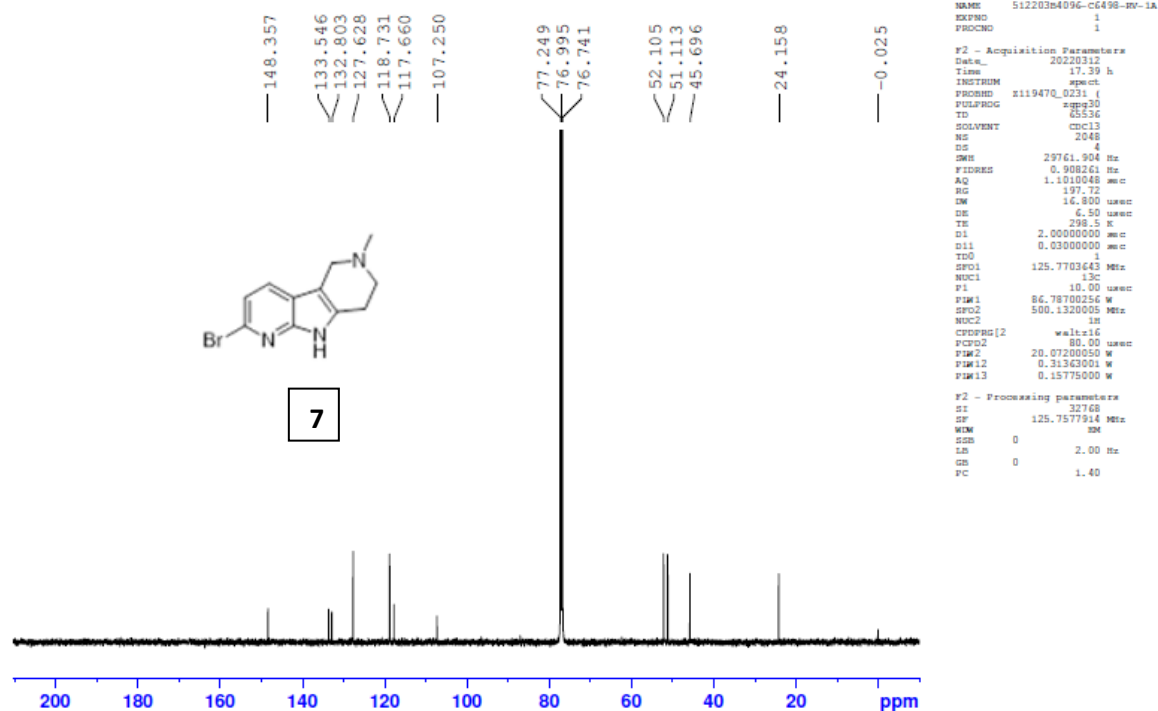

<sup>13</sup>C NMR spectrum of 2-bromo-6-methyl-6,7,8,9-tetrahydro-5H-pyrrolo[2,3-b:4,5-c']dipyridine (7) in DMSO (125 MHz)

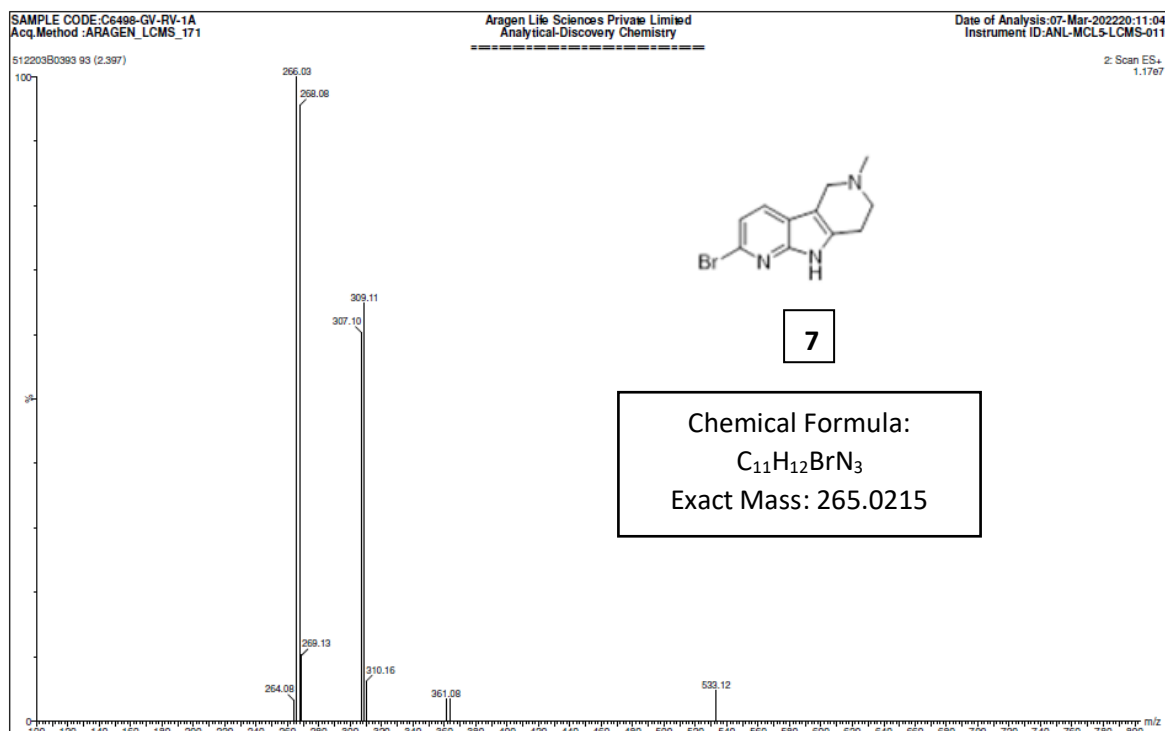

## MASS spectrum of 2-bromo-6-methyl-6,7,8,9-tetrahydro-5H-pyrrolo[2,3-b:4,5-c']dipyridine(7)

### Elemental Composition Report

Page 1

#### Single Mass Analysis

Tolerance = 820.0 PPM / DBE: min = -1.5, max = 50.0

Element prediction: Off

Number of isotope peaks used for i-FIT = 3

Monoisotopic Mass, Even Electron Ions

7 formula(e) evaluated with 1 results within limits (up to 50 best isotopic matches for each mass)

Elements Used:

C: 0-11 H: 0-13 N: 0-3 Br: 0-1

C6498-1A

Acq. method formic acid\_4min

512209B4292 42 (1.069)

Aragen Life sciences Private Limited

Analytical-Discovery Chemistry

06-Sep-2022

21:59:51

INSTRUMENT-ID: ANL-MCL5-LCMS-013

1: Scan ES+

1.62e+007

## Elemental composition report of 2-bromo-6-methyl-6,7,8,9-tetrahydro-5H-pyrrolo[2,3-b:4,5-c']dipyridine(7)

C6498-GV-RV-2A

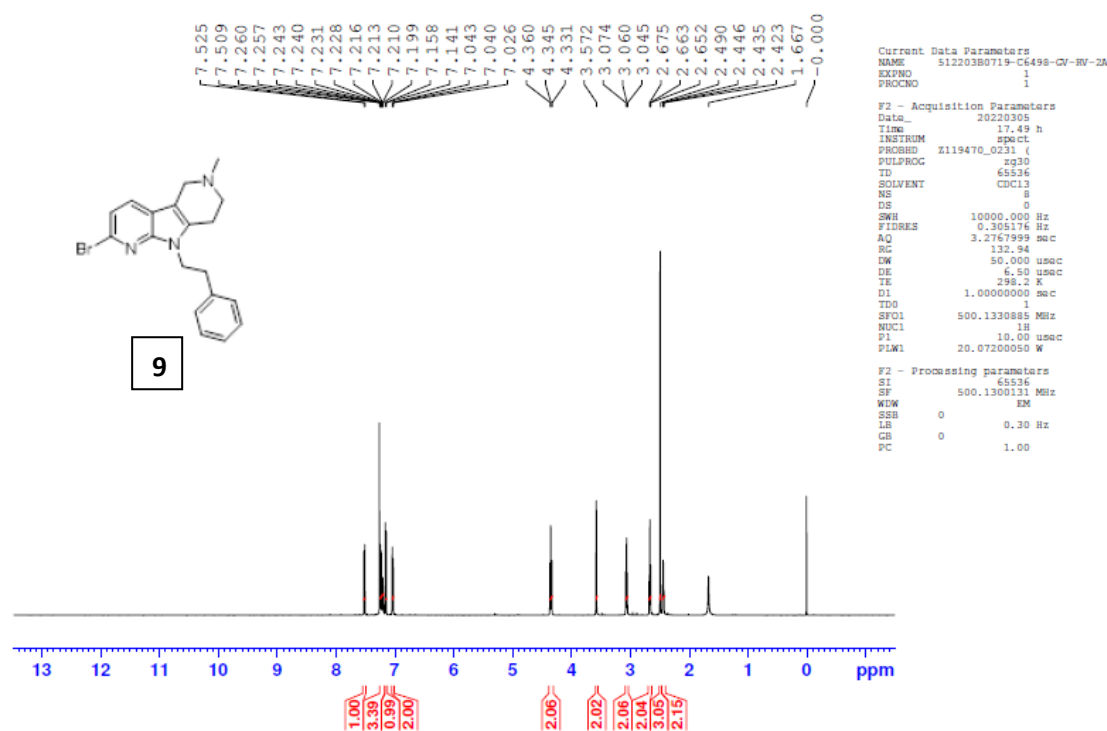

<sup>1</sup>H NMR spectrum of 2-bromo-6-methyl-9-phenethyl-6,7,8,9-tetrahydro-5H-pyrrolo[2,3-b:4,5-c']dipyridine (9) in CDCl<sub>3</sub> (500 MHz)

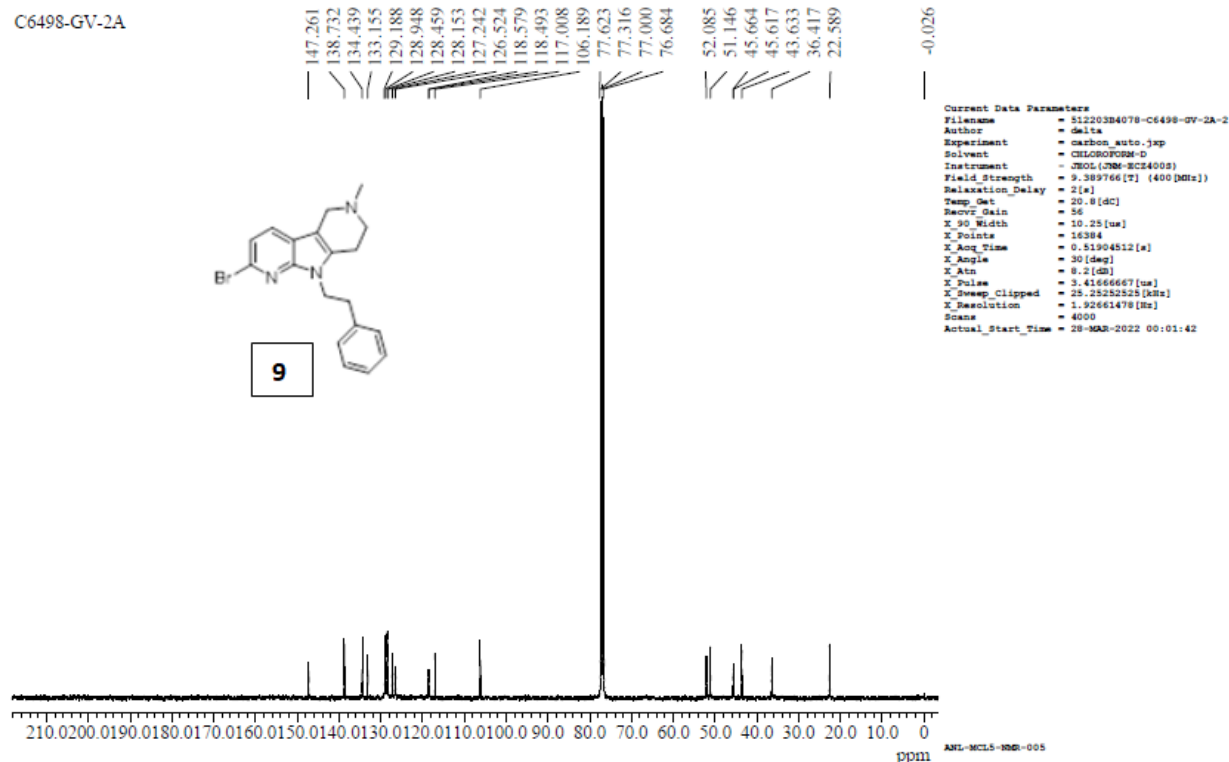

<sup>13</sup>C NMR spectrum of 2-bromo-6-methyl-9-phenethyl-6,7,8,9-tetrahydro-5H-pyrrolo[2,3-b:4,5-c']dipyridine (9) in CDCl<sub>3</sub> (100 MHz)

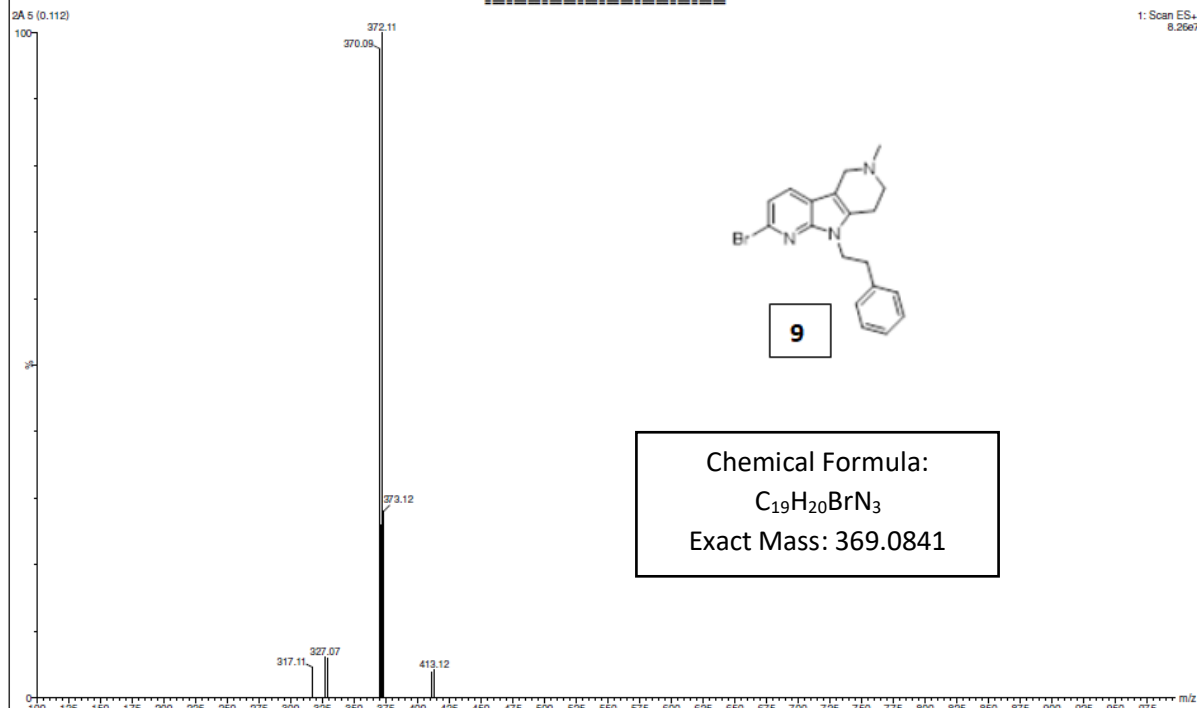

## MASS spectrum of 2-bromo-6-methyl-9-phenethyl-6,7,8,9-tetrahydro-5H-pyrrolo[2,3-b:4,5-c']dipyridine (9)

### Elemental Composition Report

Page 1

#### Single Mass Analysis

Tolerance = 820.0 PPM / DBE: min = -1.5, max = 50.0

Element prediction: Off

Number of isotope peaks used for i-FIT = 3

Monoisotopic Mass, Even Electron Ions

6 formula(e) evaluated with 1 results within limits (up to 50 best isotopic matches for each mass)

Elements Used:

C: 0-19 H: 0-21 N: 0-3 Br: 0-1

C6498-2A  
Acq.method formic acid\_4min

Aragene Life sciences Private Limited  
Analytical-Discovery Chemistry

06-Sep-2022  
22:04:45  
INSTRUMENT-ID:ANL-MCL5-LCMS-013  
1: Scan ES+  
2.07e+007

512209B4293 62 (1.586)

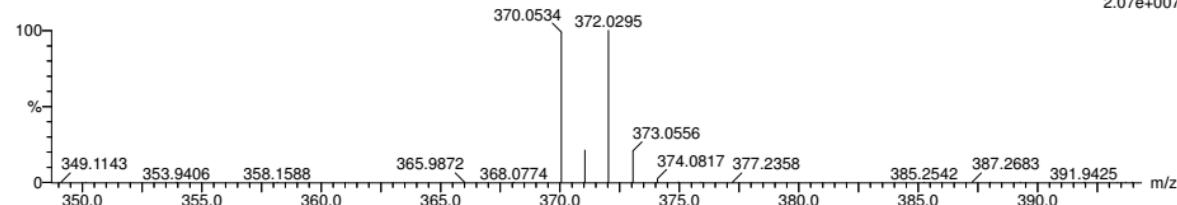

Minimum: -1.5  
Maximum: 5.0 820.0 50.0

| Mass     | Calc. Mass | mDa  | PPM  | DBE  | i-FIT | Norm | Conf(%) | Formula       |
|----------|------------|------|------|------|-------|------|---------|---------------|
| 370.0901 | 370.0919   | -1.8 | -4.9 | 10.5 | 42.8  | n/a  | n/a     | C19 H21 N3 Br |

## Elemental composition report of 2-bromo-6-methyl-9-phenethyl-6,7,8,9-tetrahydro-5H-pyrrolo[2,3-b:4,5-c']dipyridine (9)

C6498-RV-01

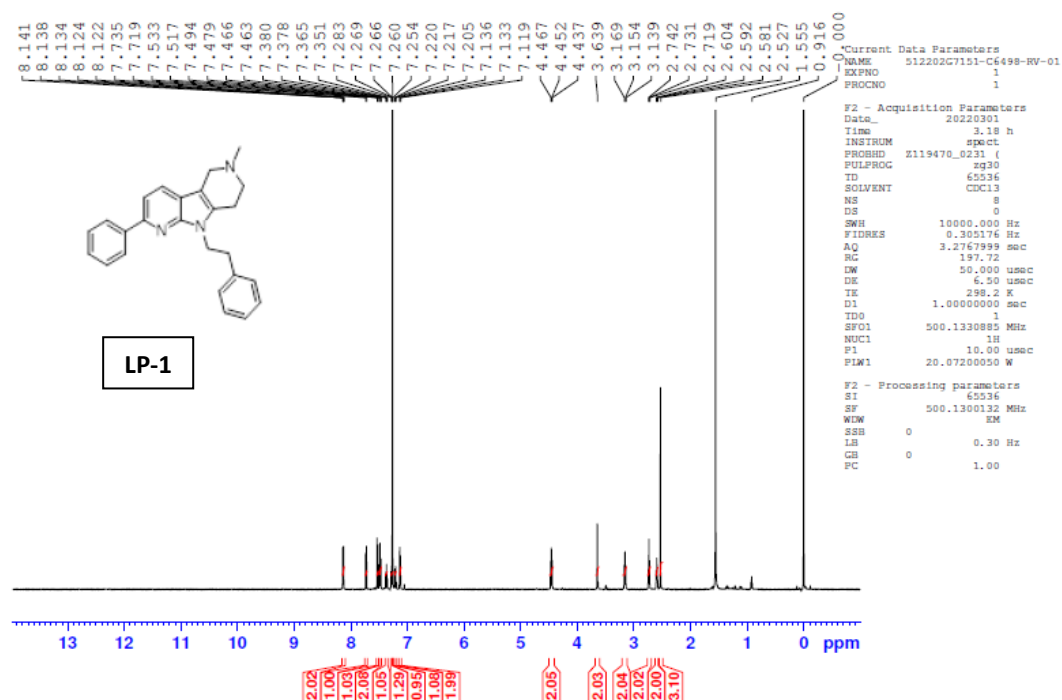

**<sup>1</sup>H NMR spectrum of 6-Methyl-9-phenethyl-2-phenyl-6,7,8,9-tetrahydro-5H-pyrrolo[2,3-b:4,5-c']dipyridine (LP-1) in CDCl<sub>3</sub> (500 MHz)**

C6498-RV-01

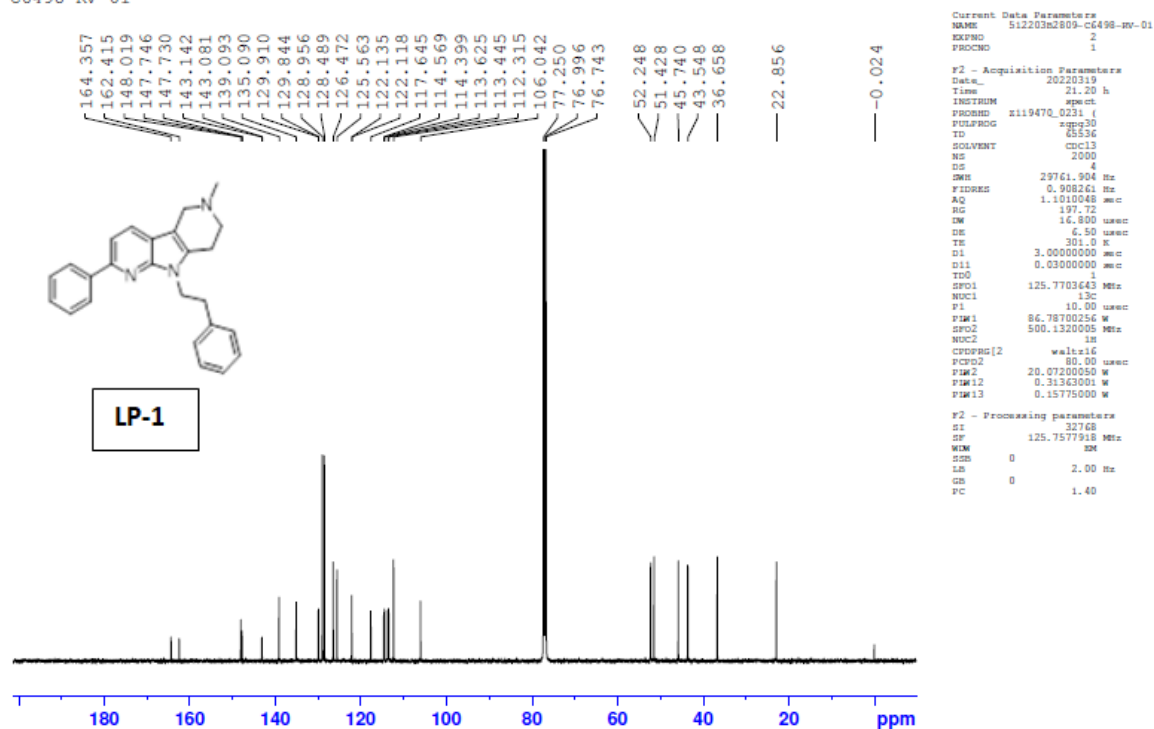

**<sup>13</sup>C NMR spectrum of 6-Methyl-9-phenethyl-2-phenyl-6,7,8,9-tetrahydro-5H-pyrrolo[2,3-b:4,5-c']dipyridine (LP-1) in CDCl<sub>3</sub> (500 MHz)**



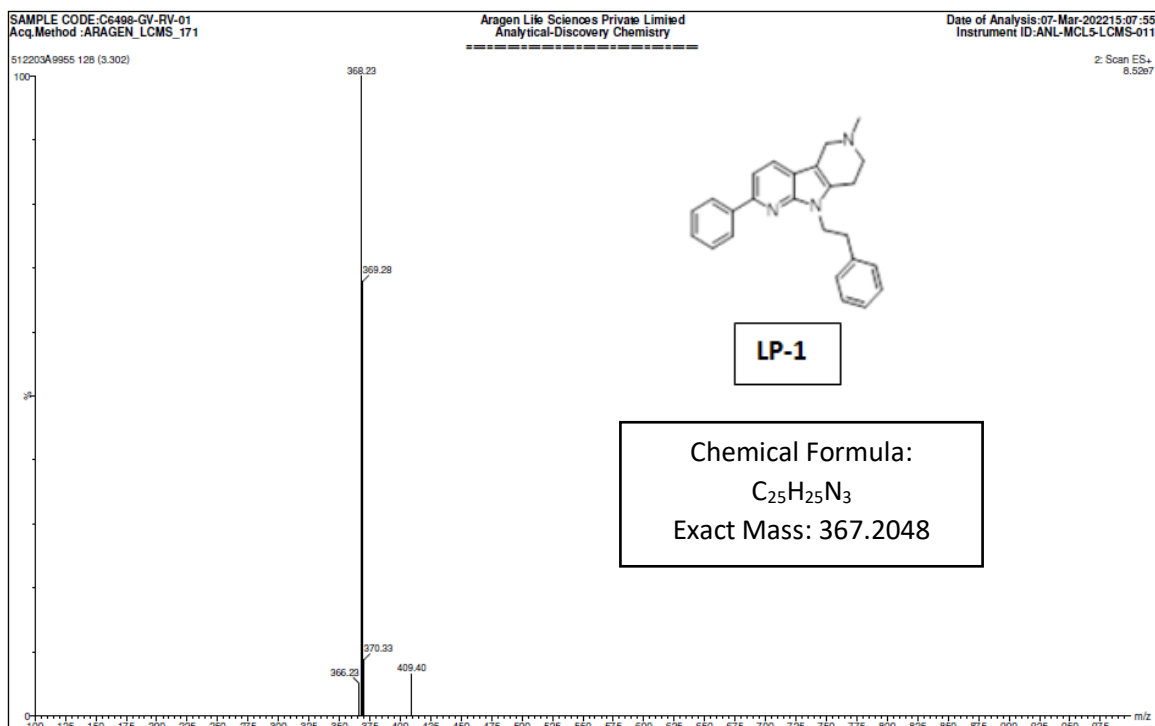

## MASS spectrum of 6-Methyl-9-phenethyl-2-phenyl-6,7,8,9-tetrahydro-5H-pyrrolo[2,3-b:4,5-c']dipyridine (LP-1)

### Elemental Composition Report

Page 1

#### Single Mass Analysis

Tolerance = 820.0 PPM / DBE: min = -1.5, max = 50.0

Element prediction: Off

Number of isotope peaks used for i-FIT = 3

Monoisotopic Mass, Even Electron Ions

2 formula(e) evaluated with 1 results within limits (up to 50 best isotopic matches for each mass)

Elements Used:

C: 0-25 H: 0-26 N: 0-3

C6498-1

Acq.method formic acid\_4min

512209B4295 70 (1.793)

Aragen Life sciences Private Limited  
Analytical-Discovery Chemistry

06-Sep-2022  
21:45:12  
INSTRUMENT-ID: ANL-MCL5-LCMS-013  
1: Scan ES+  
2.59e+007

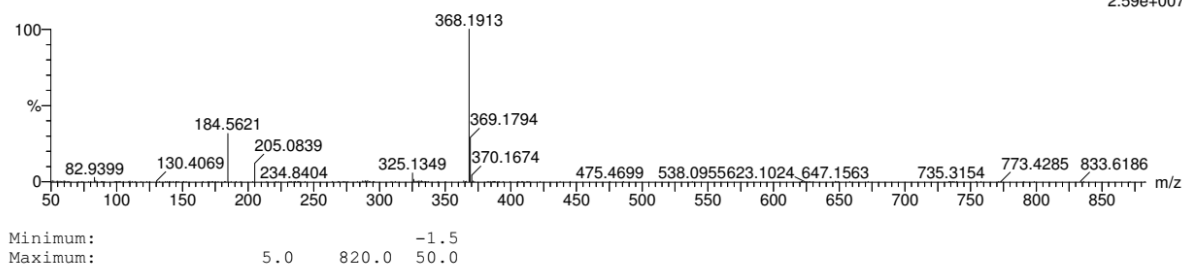

| Mass     | Calc. Mass | mDa  | PPM  | DBE  | i-FIT | Norm | Conf (%) | Formula    |
|----------|------------|------|------|------|-------|------|----------|------------|
| 368.2120 | 368.2127   | -0.7 | -1.9 | 14.5 | 37.9  | n/a  | n/a      | C25 H26 N3 |

## Elemental composition report of 6-Methyl-9-phenethyl-2-phenyl-6,7,8,9-tetrahydro-5H-pyrrolo[2,3-b:4,5-c']dipyridine (LP-1)

C6498-RV-02

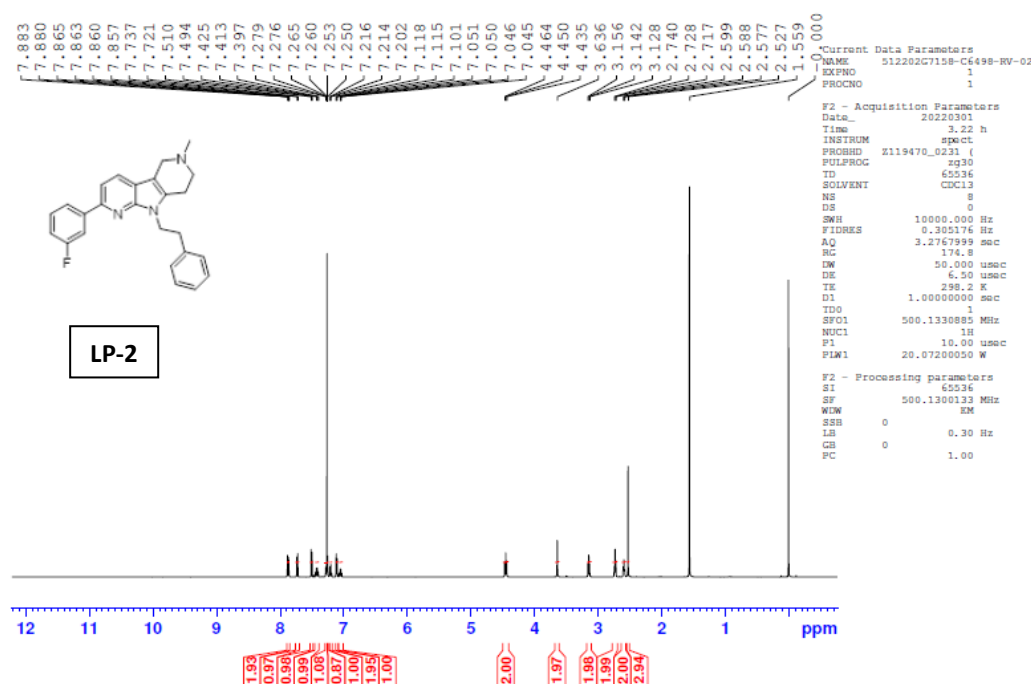

**<sup>1</sup>H NMR spectrum of 2-(3-Fluorophenyl)-6-methyl-9-phenethyl-6,7,8,9-tetrahydro-5H-pyrrolo[2,3-b:4,5-c']dipyridine (LP-2) in CDCl<sub>3</sub> (500 MHz)**

C6498-RV-02

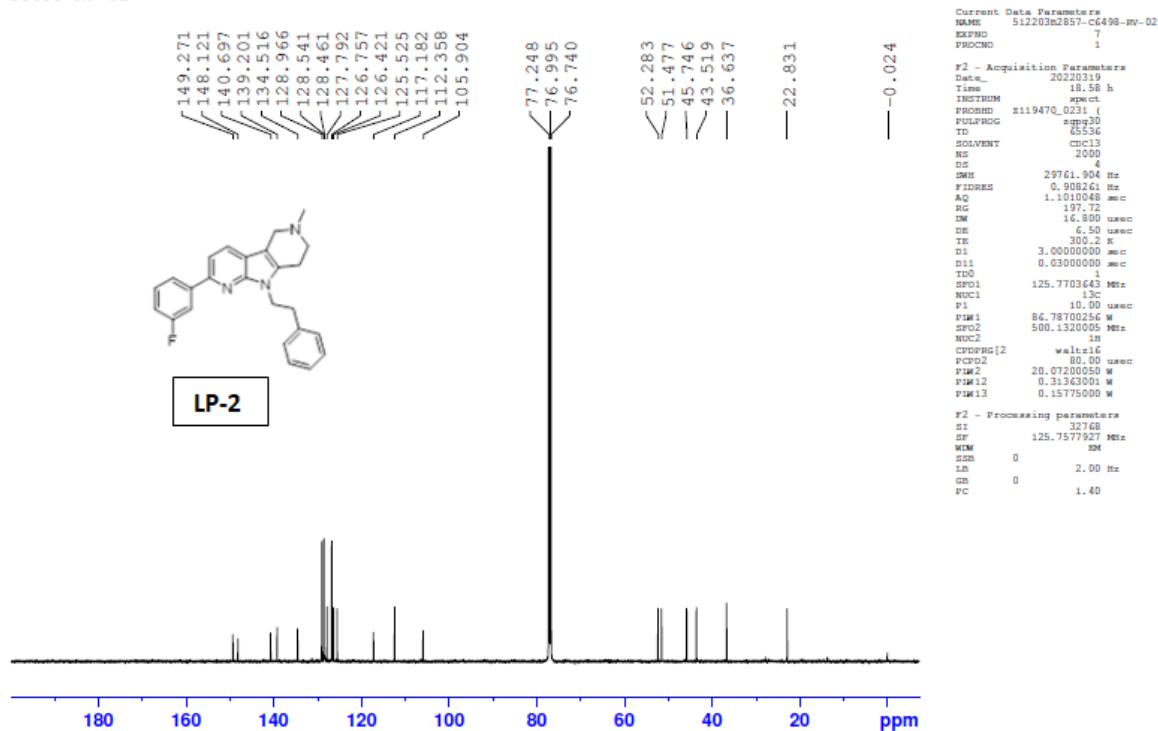

**<sup>13</sup>C NMR spectrum of 2-(3-Fluorophenyl)-6-methyl-9-phenethyl-6,7,8,9-tetrahydro-5H-pyrrolo[2,3-b:4,5-c']dipyridine (LP-2) in CDCl<sub>3</sub> (125 MHz)**

C6498-RV-02

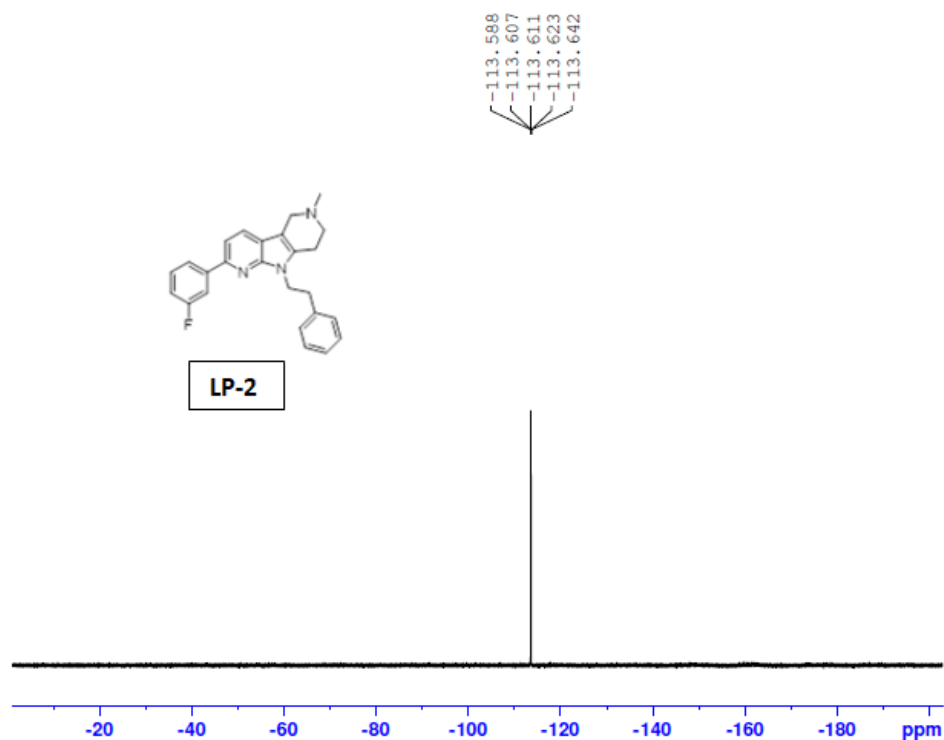

Current Data Parameters  
NAME 512203A9960-129-C6498-RV-02  
EXPNO 64  
PROCNO 1

F2 - Acquisition Parameters  
Date\_ 20220329  
Time 13.13 h  
INSTRUM spect  
PROBHD z119470\_0231 (   
PULPROG zgpg30  
TD 130956  
SOLVENT CDCl3  
NS 16  
DS 4  
SWH 113636.367 Hz  
FIDRES 1.735754 Hz  
AQ 0.5761184 sec  
RG 197.72  
SW 4.400 usec  
DE 6.50 usec  
TE 298.2 K  
D1 1.00000000 sec  
TD0 1  
SFO1 470.5453180 MHz  
NUC1 19F  
P1 15.00 usec  
F1W1 34.86600113 W

F2 - Processing parameters  
SI 65536  
SF 470.5923772 MHz  
WDW EM  
SSB 0  
LB 2.00 Hz  
GB 0  
PC 1.00

**<sup>19</sup>F NMR spectrum of 2-(3-Fluorophenyl)-6-methyl-9-phenethyl-6,7,8,9-tetrahydro-5H-pyrrolo[2,3-b:4,5-c']dipyridine (LP-2) in CDCl<sub>3</sub> (470 MHz)**

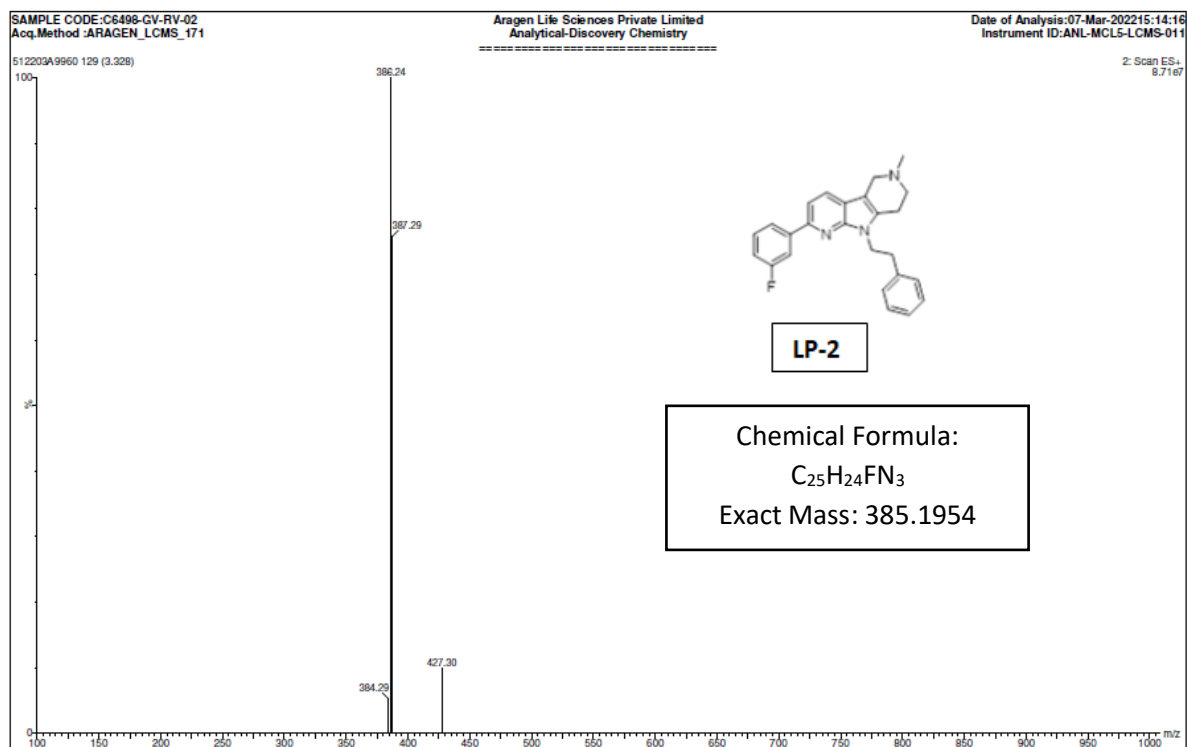

# **MASS spectrum of 2-(3-Fluorophenyl)-6-methyl-9-phenethyl-6,7,8,9-tetrahydro-5H-pyrrolo[2,3-b:4,5-c']dipyrindine (LP-2)**

## **Elemental Composition Report**

**Page 1**

### **Single Mass Analysis**

Tolerance = 820.0 PPM / DBE: min = -1.5, max = 50.0

Element prediction: Off

Number of isotope peaks used for i-FIT = 3

Monoisotopic Mass, Even Electron Ions

4 formula(e) evaluated with 1 results within limits (up to 50 best isotopic matches for each mass)

Elements Used:

C: 0-25 H: 0-25 N: 0-3 F: 0-1

C6498-2

Acq.method formic acid\_4min

Aragene Life sciences Private Limited  
Analytical-Discovery Chemistry

06-Sep-2022

21:50:04

INSTRUMENT-ID:ANL-MCL5-LCMS-013

1: Scan ES+

4.05e+007

512209B4296 71 (1.819)

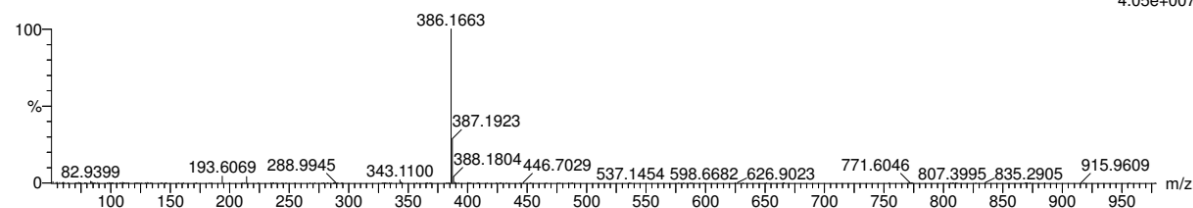

Minimum: -1.5  
Maximum: 5.0 820.0 50.0

| Mass     | Calc. Mass | mDa  | PPM  | DBE  | i-FIT | Norm | Conf (%) | Formula      |
|----------|------------|------|------|------|-------|------|----------|--------------|
| 386.2001 | 386.2033   | -3.2 | -8.3 | 14.5 | 38.7  | n/a  | n/a      | C25 H25 N3 F |

# **Elemental composition report of 2-(3-Fluorophenyl)-6-methyl-9-phenethyl-6,7,8,9-tetrahydro-5H-pyrrolo[2,3-b:4,5-c']dipyrindine (LP-2)**

C6498-CV-RV-03

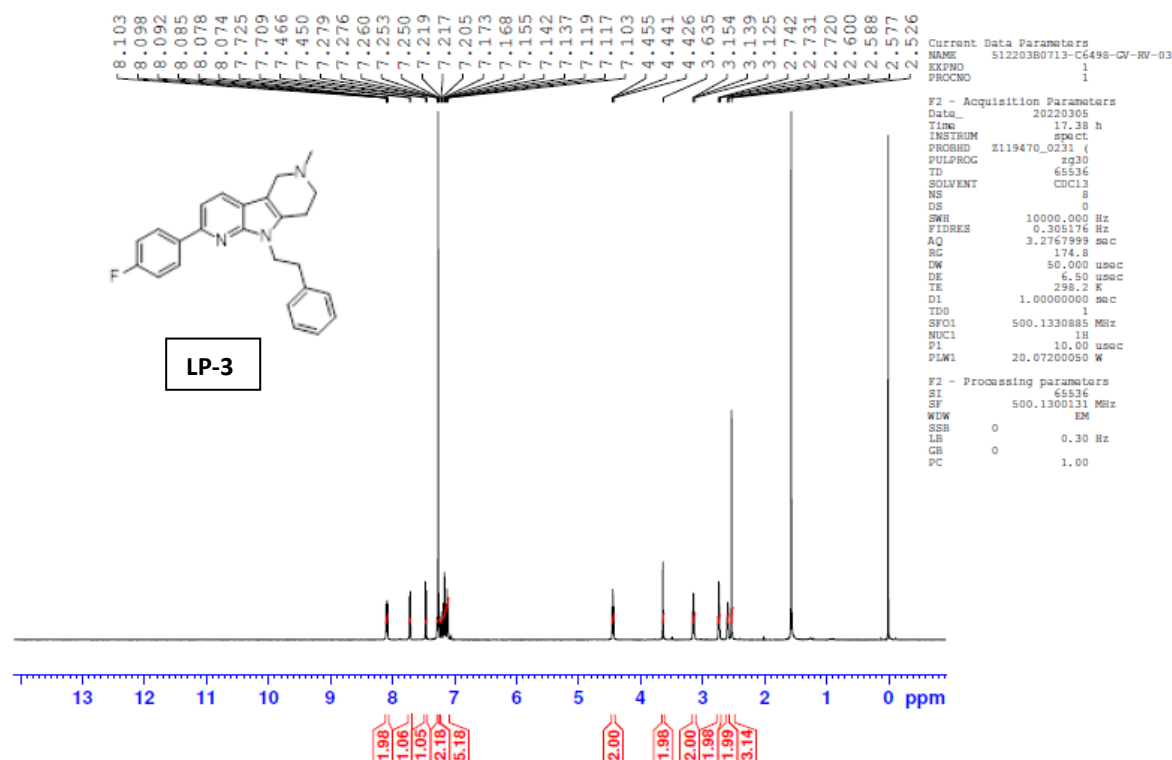

# **<sup>1</sup>H NMR spectrum of 2-(4-Fluorophenyl)-6-methyl-9-phenethyl-6,7,8,9-tetrahydro-5H-pyrrolo[2,3-b:4,5-c']dipyrindine (LP-3) in CDCl<sub>3</sub> (500 MHz)**

C6498-RV-03

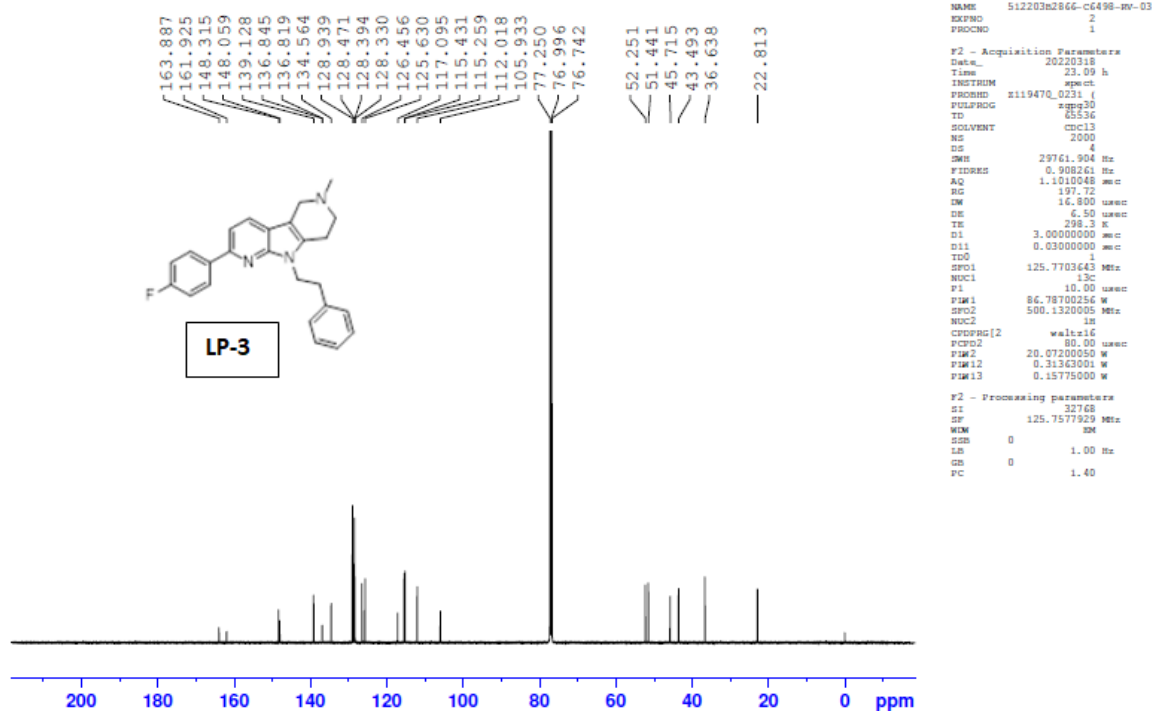

**<sup>13</sup>CNMR spectrum of 2-(4-Fluorophenyl)-6-methyl-9-phenethyl-6,7,8,9-tetrahydro-5H-pyrrolo[2,3-b:4,5-c']dipyridine (LP-3) in CDCl<sub>3</sub> (125 MHz)**

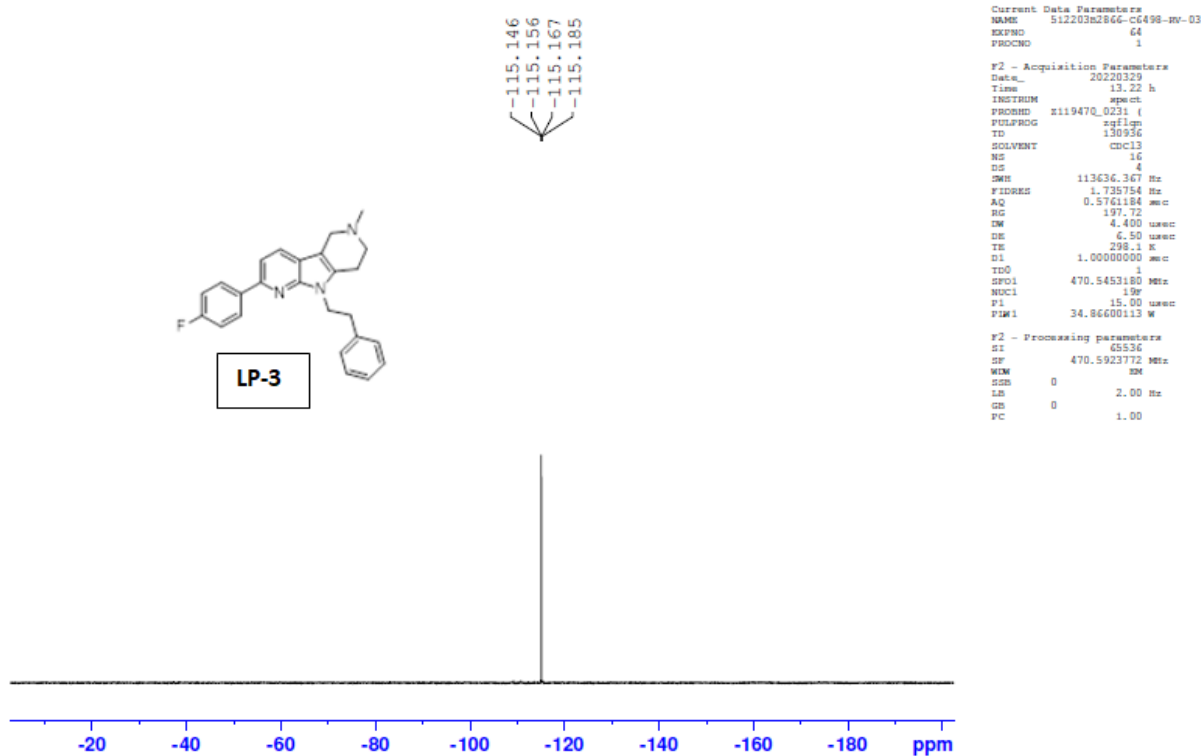

**<sup>19</sup>FNMR spectrum of 2-(4-Fluorophenyl)-6-methyl-9-phenethyl-6,7,8,9-tetrahydro-5H-pyrrolo[2,3-b:4,5-c']dipyridine (LP-3) in CDCl<sub>3</sub> (470 MHz)**

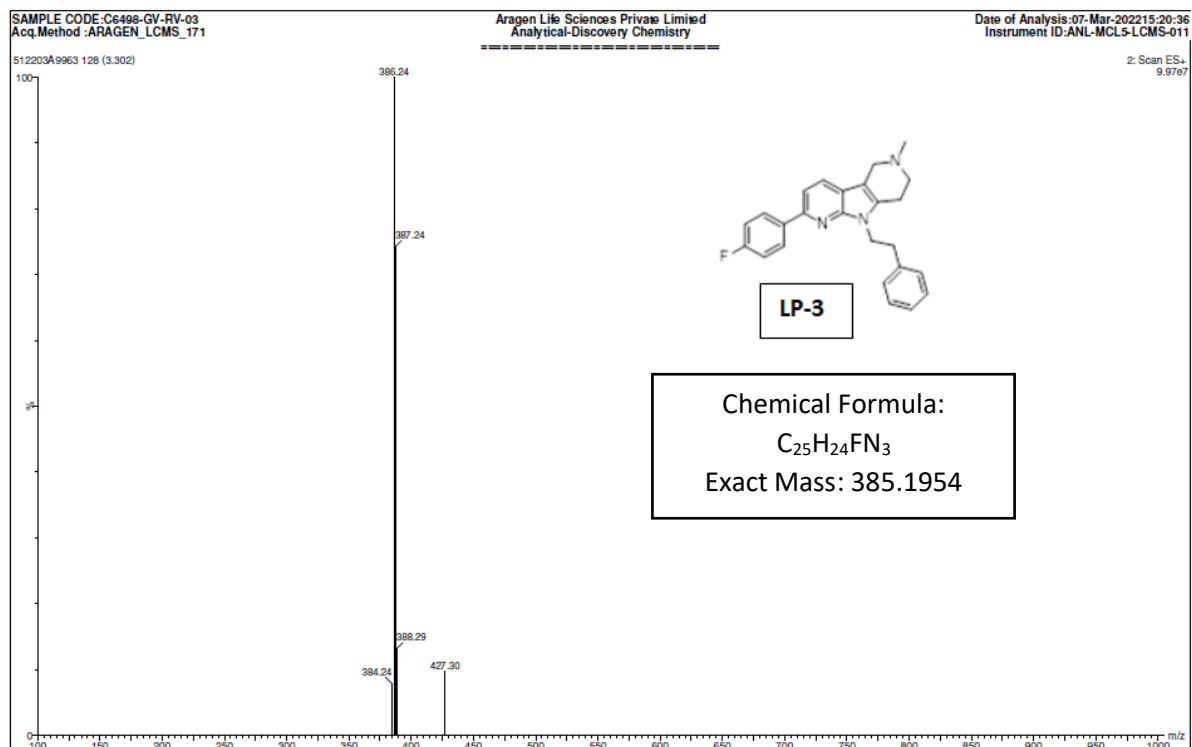

## MASS spectrum of 2-(4-Fluorophenyl)-6-methyl-9-phenethyl-6,7,8,9-tetrahydro-5H-pyrrolo[2,3-b:4,5-c']dipyridine (LP-3)

### Elemental Composition Report

Page 1

#### Single Mass Analysis

Tolerance = 500.0 PPM / DBE: min = -1.5, max = 50.0

Element prediction: Off

Number of isotope peaks used for i-FIT = 3

Monoisotopic Mass, Even Electron Ions

4 formula(e) evaluated with 1 results within limits (up to 50 best isotopic matches for each mass)

Elements Used:

C: 0-25 H: 0-25 N: 0-3 F: 0-1

Sample Code: C6498-3

Acq Method: ARAGEN\_LCMS\_190

Aragen Life Sciences Private Limited  
Analytical-Discovery Chemistry

Instrument ID: ANL-MCL3-LCMS-010  
Date of Analysis: 16-Sep-2022 15:30:15

512209B4297 80 (2.052)

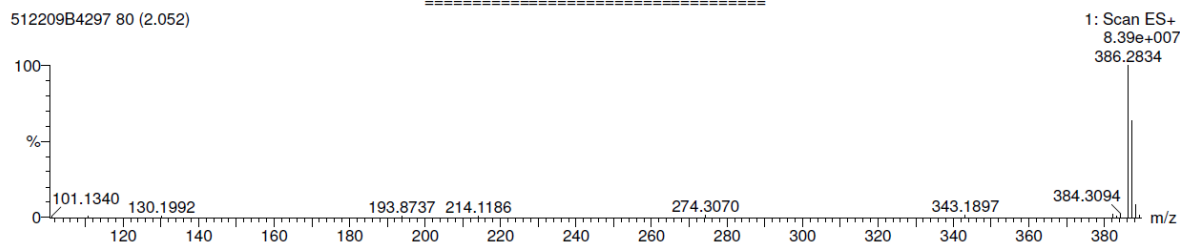

Minimum:

Maximum: 5.0 500.0 -1.5

| Mass     | Calc. Mass | mDa | PPM | DBE  | i-FIT | Norm | Conf (%) | Formula                                          |
|----------|------------|-----|-----|------|-------|------|----------|--------------------------------------------------|
| 386.2060 | 386.2033   | 2.7 | 7.0 | 14.5 | 61.0  | n/a  | n/a      | C <sub>25</sub> H <sub>25</sub> N <sub>3</sub> F |

## Elemental analysis report of 2-(4-Fluorophenyl)-6-methyl-9-phenethyl-6,7,8,9-tetrahydro-5H-pyrrolo[2,3-b:4,5-c']dipyridine (LP-3)

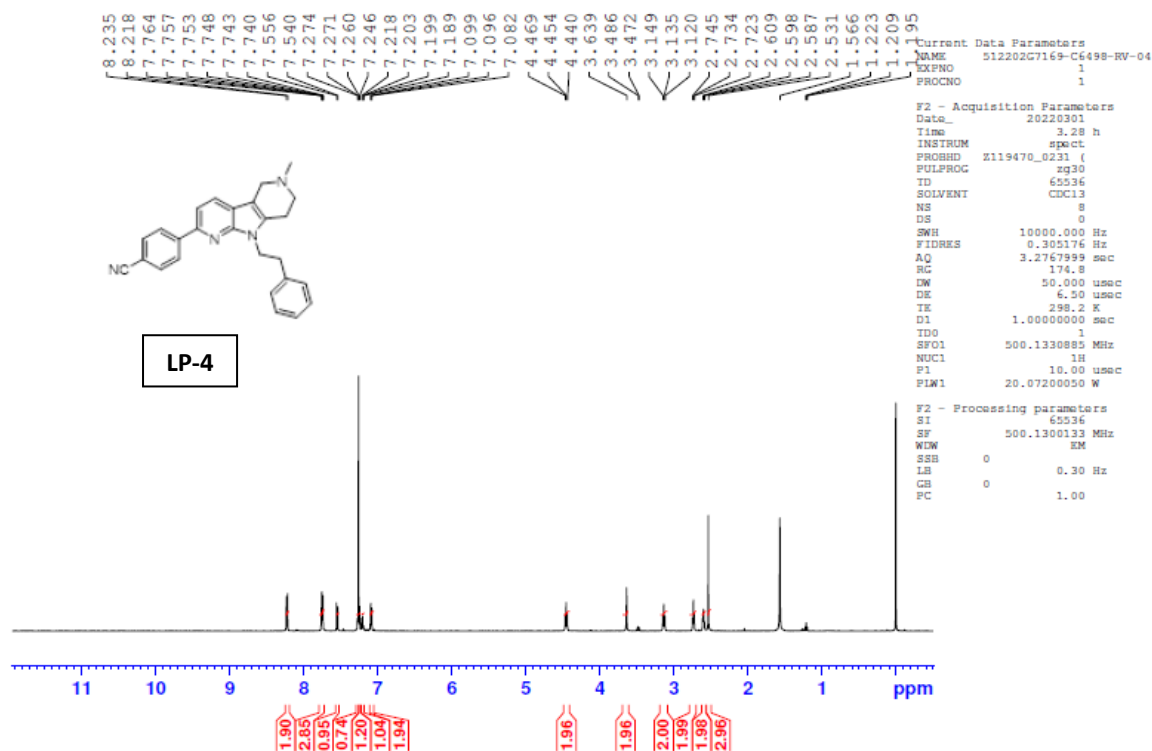

**<sup>1</sup>H NMR spectrum of 4-(6-Methyl-9-phenethyl-6,7,8,9-tetrahydro-5H-pyrrolo[2,3-b:4,5-c']dipyridin-2-yl)benzonitrile (LP-4) in CDCl<sub>3</sub> (500 MHz)**

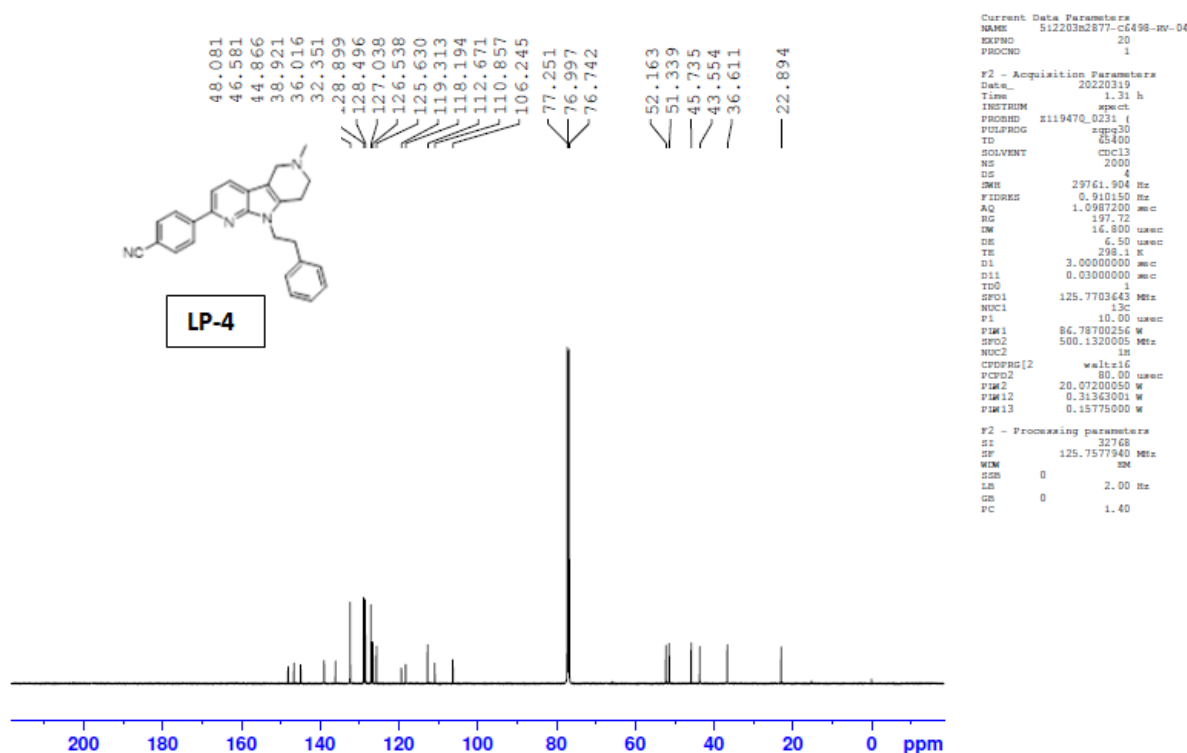

**<sup>13</sup>C NMR spectrum of 4-(6-Methyl-9-phenethyl-6,7,8,9-tetrahydro-5H-pyrrolo[2,3-b:4,5-c']dipyridin-2-yl)benzonitrile (LP-4) in CDCl<sub>3</sub> (125 MHz)**

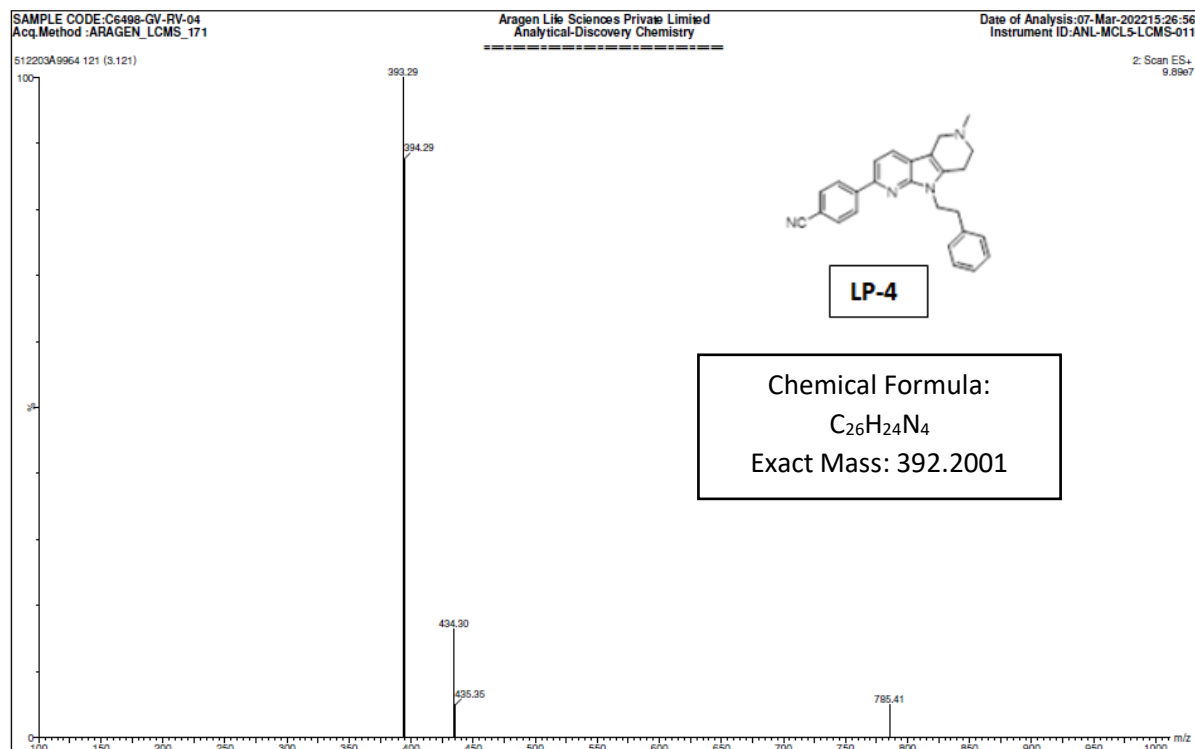

## MASS spectrum of 4-(6-Methyl-9-phenethyl-6,7,8,9-tetrahydro-5H-pyrrolo[2,3-b:4,5-c']dipyridin-2-yl)benzonitrile (LP-4)

### Elemental Composition Report

Page 1

#### Single Mass Analysis

Tolerance = 500.0 PPM / DBE: min = -1.5, max = 50.0

Element prediction: Off

Number of isotope peaks used for i-FIT = 3

Monoisotopic Mass, Even Electron Ions

3 formula(e) evaluated with 1 results within limits (up to 50 best isotopic matches for each mass)

Elements Used:

C: 0-26 H: 0-25 N: 0-4

Sample Code: C6498-4

Acq Method: ARAGEN\_LCMS\_190

Aragen Life Sciences Private Limited  
Analytical-Discovery Chemistry

Instrument ID: ANL-MCL3-LCMS-010  
Date of Analysis: 16-Sep-2022 15:36:20

512209B4298 74 (1.897)

1: Scan ES+  
9.31e+007

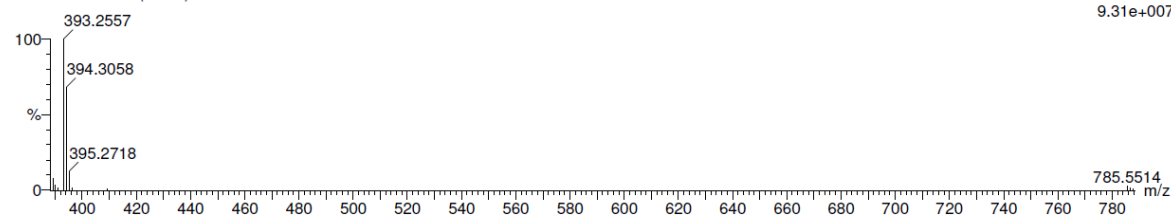

Minimum: -1.5  
Maximum: 5.0 500.0 50.0

| Mass     | Calc. Mass | mDa  | PPM  | DBE  | 1-FIT | Norm | Conf (%) | Formula                                        |
|----------|------------|------|------|------|-------|------|----------|------------------------------------------------|
| 393.2050 | 393.2079   | -2.9 | -7.4 | 16.5 | 63.1  | n/a  | n/a      | C <sub>26</sub> H <sub>25</sub> N <sub>4</sub> |

## Elemental analysis report of 4-(6-Methyl-9-phenethyl-6,7,8,9-tetrahydro-5H-pyrrolo[2,3-b:4,5-c']dipyridin-2-yl)benzonitrile (LP-4)



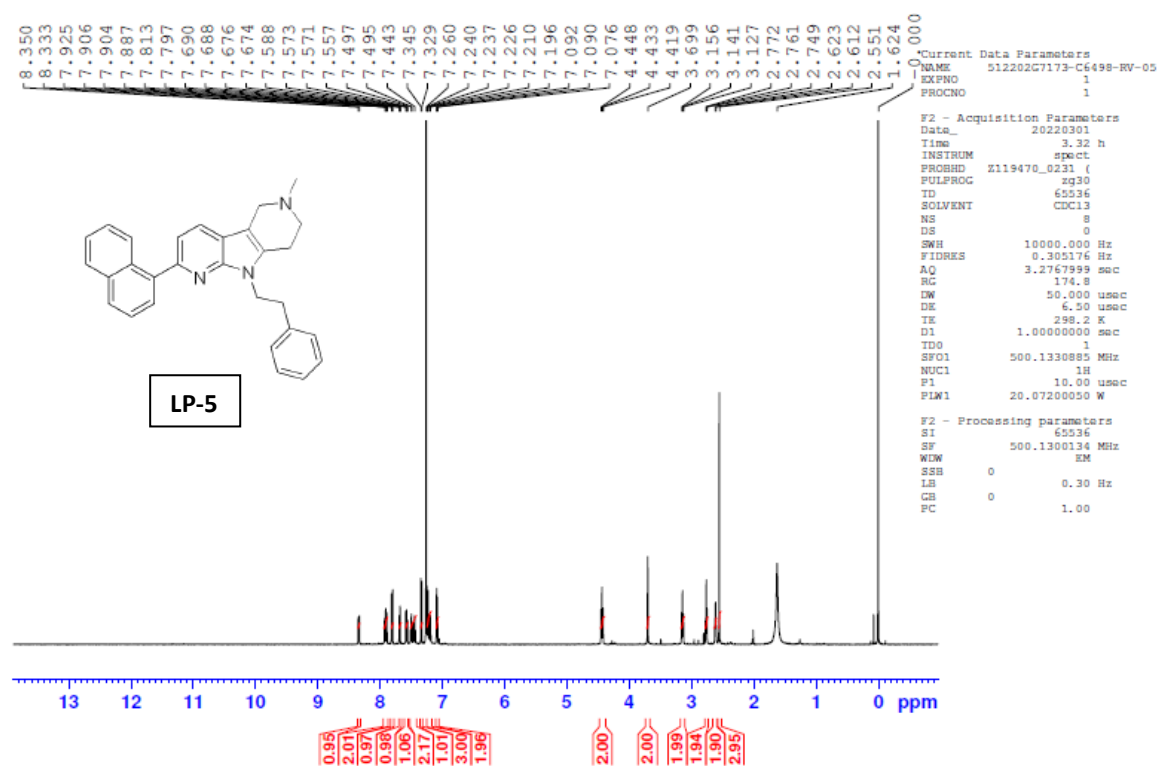

**<sup>1</sup>H NMR spectrum of 6-Methyl-2-(naphthalen-1-yl)-9-phenethyl-6,7,8,9-tetrahydro-5H-pyrrolo[2,3-b:4,5-c']dipyridine (LP-5) in CDCl<sub>3</sub> (500 MHz)**

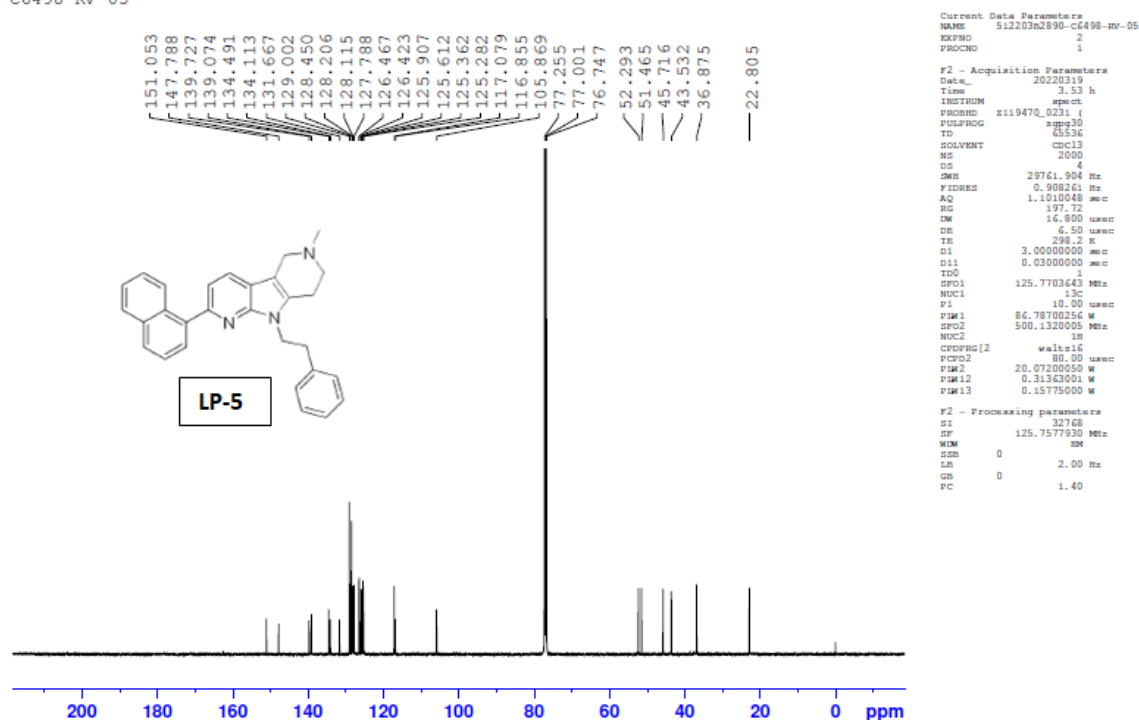

**<sup>13</sup>C NMR spectrum of 6-Methyl-2-(naphthalen-1-yl)-9-phenethyl-6,7,8,9-tetrahydro-5H-pyrrolo[2,3-b:4,5-c']dipyridine (LP-5) in CDCl<sub>3</sub> (125 MHz)**

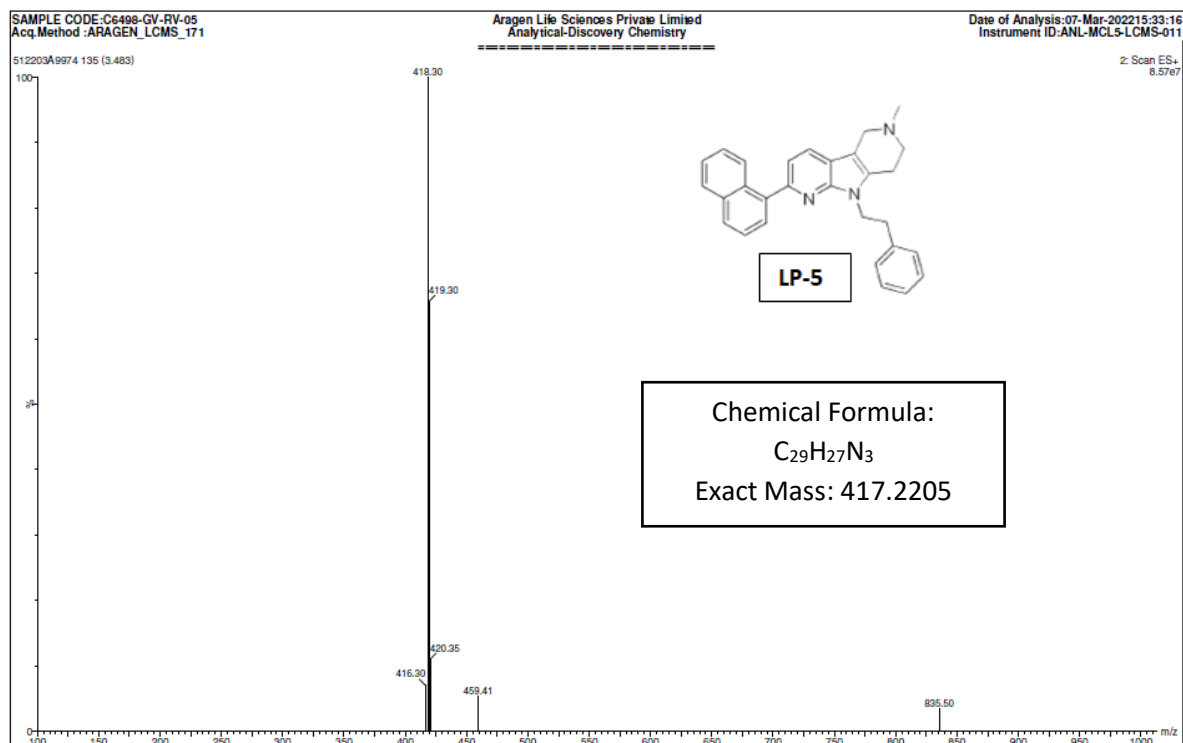

**MASS spectrum of 6-Methyl-2-(naphthalen-1-yl)-9-phenethyl-6,7,8,9-tetrahydro-5H-pyrrolo[2,3-b:4,5-c']dipyridine (LP-5)**

**Elemental Composition Report**

Page 1

**Single Mass Analysis**

Tolerance = 500.0 PPM / DBE: min = -1.5, max = 50.0

Element prediction: Off

Number of isotope peaks used for i-FIT = 3

Monoisotopic Mass, Even Electron Ions

1 formula(e) evaluated with 1 results within limits (up to 50 best isotopic matches for each mass)

Elements Used:

C: 0-29 H: 0-28 N: 0-3

Sample Code: C6498-5

Acq Method: ARAGEN\_LCMS\_190

Aragen Life Sciences Private Limited  
Analytical-Discovery Chemistry

Instrument ID: ANL-MCL3-LCMS-010

Date of Analysis: 16-Sep-2022 15:42:27

512209B4299 81 (2.078)

1: Scan ES+  
8.92e+007

**Elemental composition report of 6-Methyl-2-(naphthalen-1-yl)-9-phenethyl-6,7,8,9-tetrahydro-5H-pyrrolo[2,3-b:4,5-c']dipyridine (LP-5)**

C6498-RV-06

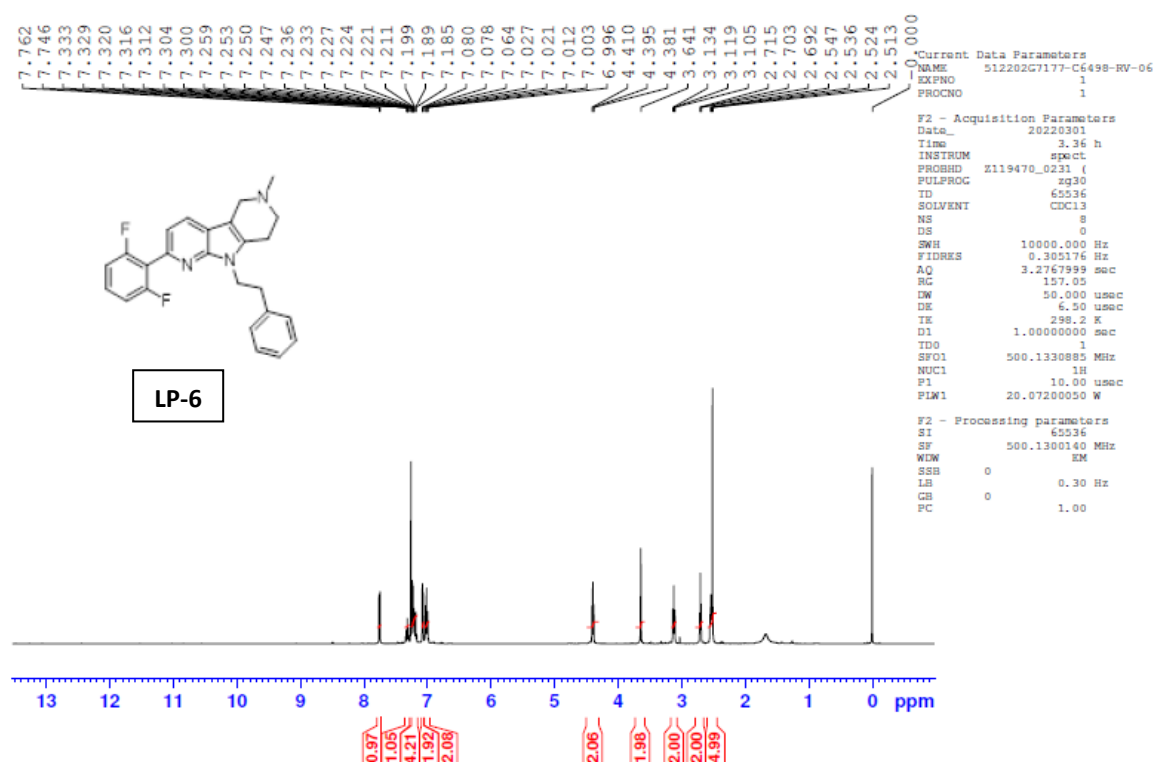

**<sup>1</sup>H NMR spectrum of 2-(2,6-Difluorophenyl)-6-methyl-9-phenethyl-6,7,8,9-tetrahydro-5H-pyrrolo[2,3-b:4,5-c']dipyridine (LP-6) in CDCl<sub>3</sub> (500 MHz)**

C6498-RV-06

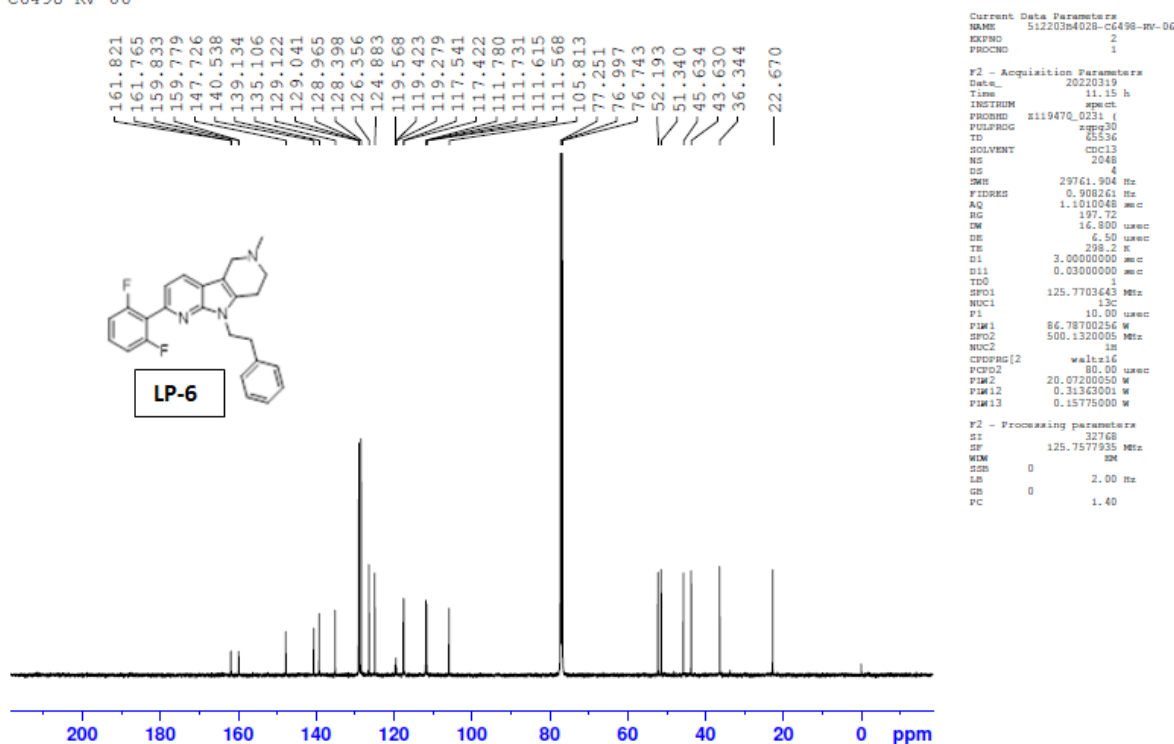

**<sup>13</sup>C NMR spectrum of 2-(2,6-Difluorophenyl)-6-methyl-9-phenethyl-6,7,8,9-tetrahydro-5H-pyrrolo[2,3-b:4,5-c']dipyridine (LP-6) in CDCl<sub>3</sub> (125 MHz)**

C6498-RV-06

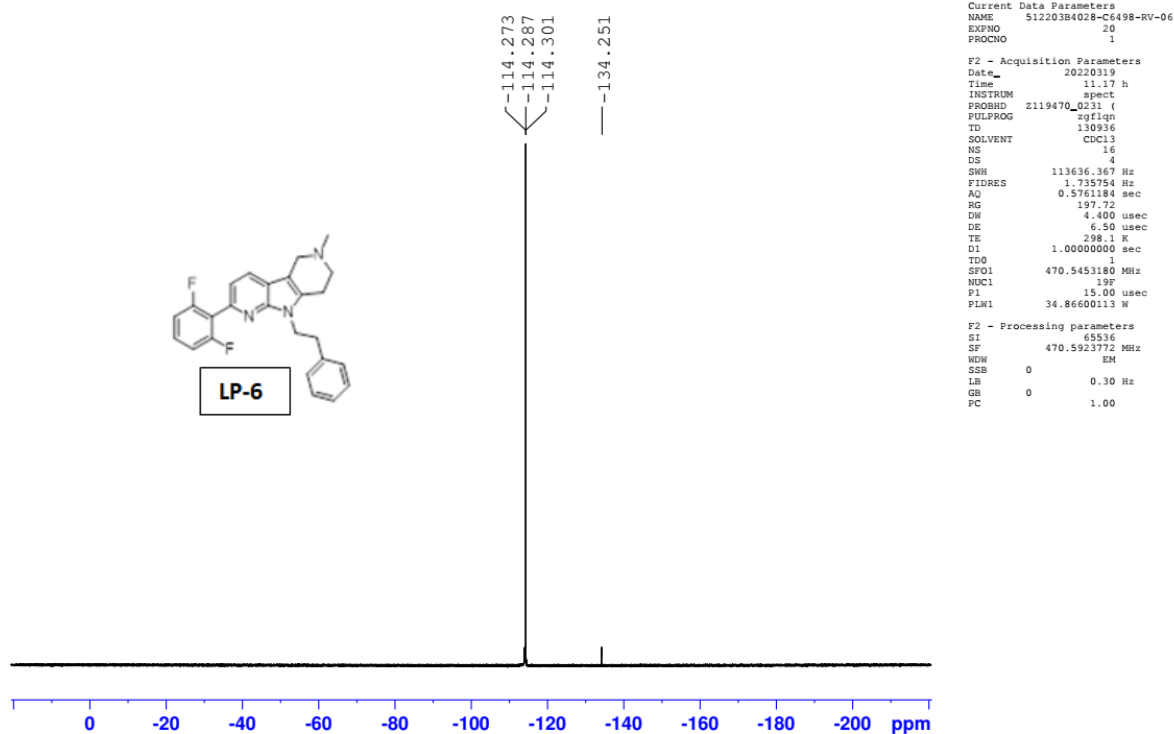

**<sup>19</sup>F NMR spectrum of 2-(2,6-Difluorophenyl)-6-methyl-9-phenethyl-6,7,8,9-tetrahydro-5H-pyrrolo[2,3-b:4,5-c']dipyridine (LP-6) in CDCl<sub>3</sub> (470 MHz)**

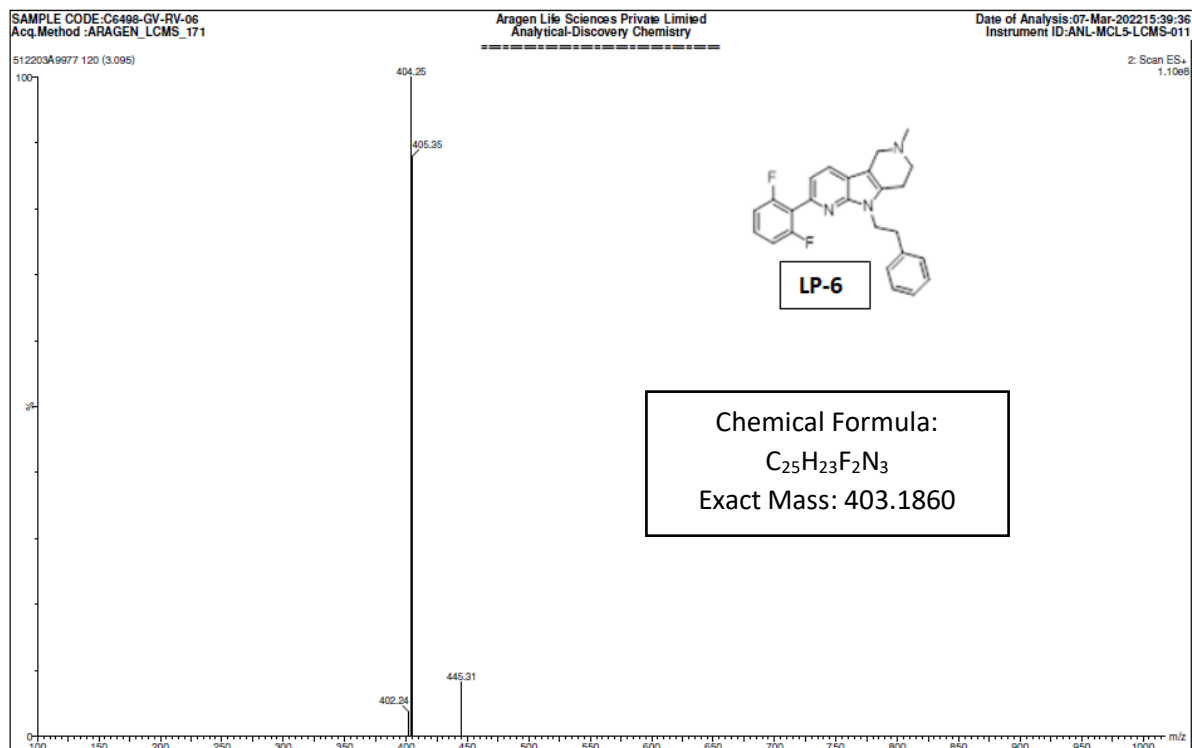

**MASS spectrum of 2-(2,6-Difluorophenyl)-6-methyl-9-phenethyl-6,7,8,9-tetrahydro-5H-pyrrolo[2,3-b:4,5-c']dipyridine (LP-6)**

## Elemental Composition Report

Page 1

### Single Mass Analysis

Tolerance = 500.0 PPM / DBE: min = -1.5, max = 50.0

Element prediction: Off

Number of isotope peaks used for i-FIT = 3

Monoisotopic Mass, Even Electron Ions

7 formula(e) evaluated with 1 results within limits (up to 50 best isotopic matches for each mass)

Elements Used:

C: 0-25 H: 0-24 N: 0-3 F: 0-2

Sample Code: C6498-6

Acq Method: ARAGEN\_LCMS\_190

Aragen Life Sciences Private Limited  
Analytical Discovery Chemistry

Instrument ID :ANL-MCL3-LCMS-010  
Date of Analysis:16-Sep-202215:48:25

512209B4300 76 (1.949)

1: Scan ES+  
1.02e+008

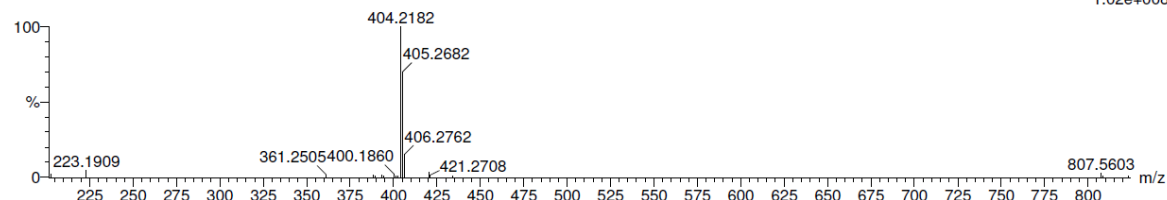

Minimum: -1.5  
Maximum: 5.0 500.0 50.0

| Mass     | Calc. Mass | mDa | PPM | DBE  | i-FIT | Norm | Conf(%) | Formula       |
|----------|------------|-----|-----|------|-------|------|---------|---------------|
| 404.1958 | 404.1938   | 2.0 | 4.9 | 14.5 | 64.4  | n/a  | n/a     | C25 H24 N3 F2 |

## Elemental composition report of 2-(2,6-Difluorophenyl)-6-methyl-9-phenethyl-6,7,8,9-tetrahydro-5H-pyrrolo[2,3-b:4,5-c']dipyridine (LP-6)

C6498-RV-07

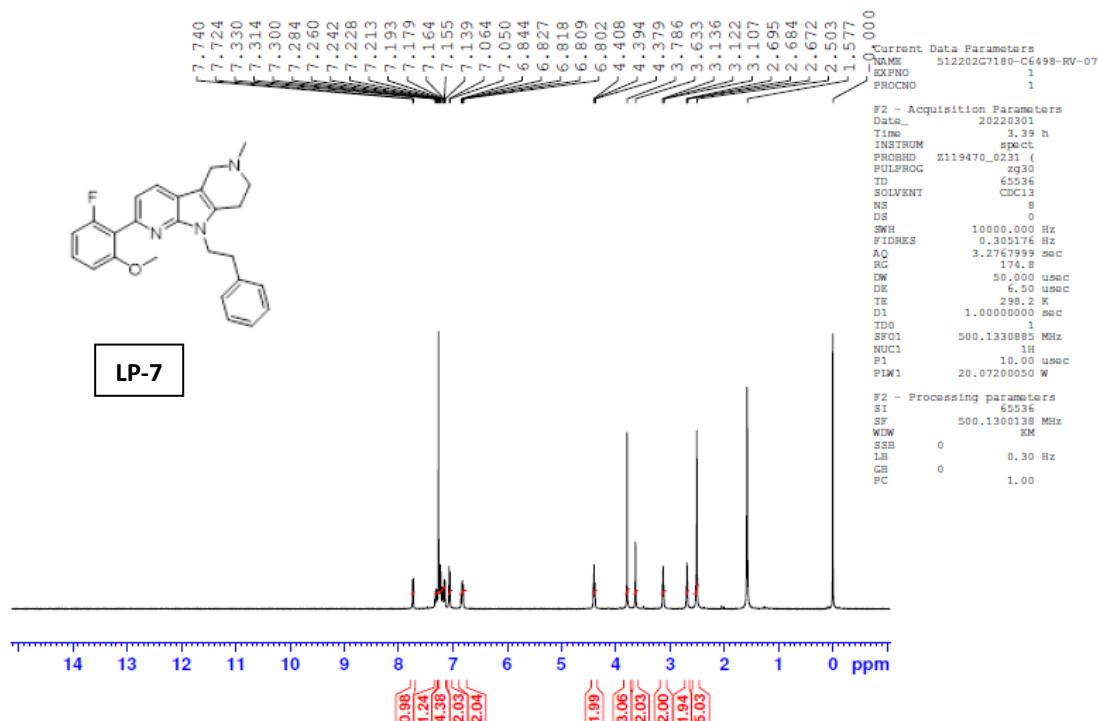

## <sup>1</sup>H NMR spectrum of 2-(2-Fluoro-6-methoxyphenyl)-6-methyl-9-phenethyl-6,7,8,9-tetrahydro-5H-pyrrolo[2,3-b:4,5-c']dipyridine (LP-7) in CDCl<sub>3</sub> (500 MHz)

C6498-RV-07

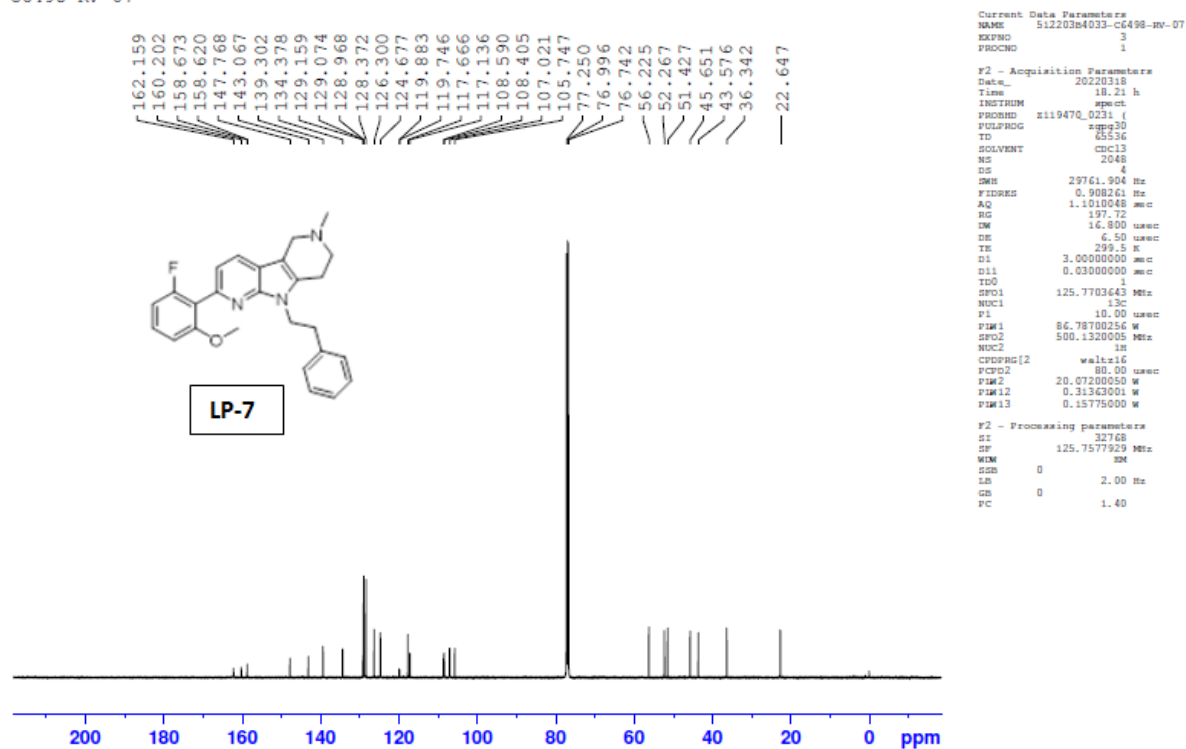

**<sup>13</sup>CNMR spectrum of 2-(2-Fluoro-6-methoxyphenyl)-6-methyl-9-phenethyl-6,7,8,9-tetrahydro-5H-pyrrolo[2,3-b:4,5-c']dipyridine (LP-7) in CDCl<sub>3</sub> (125 MHz)**

C6498-RV-07

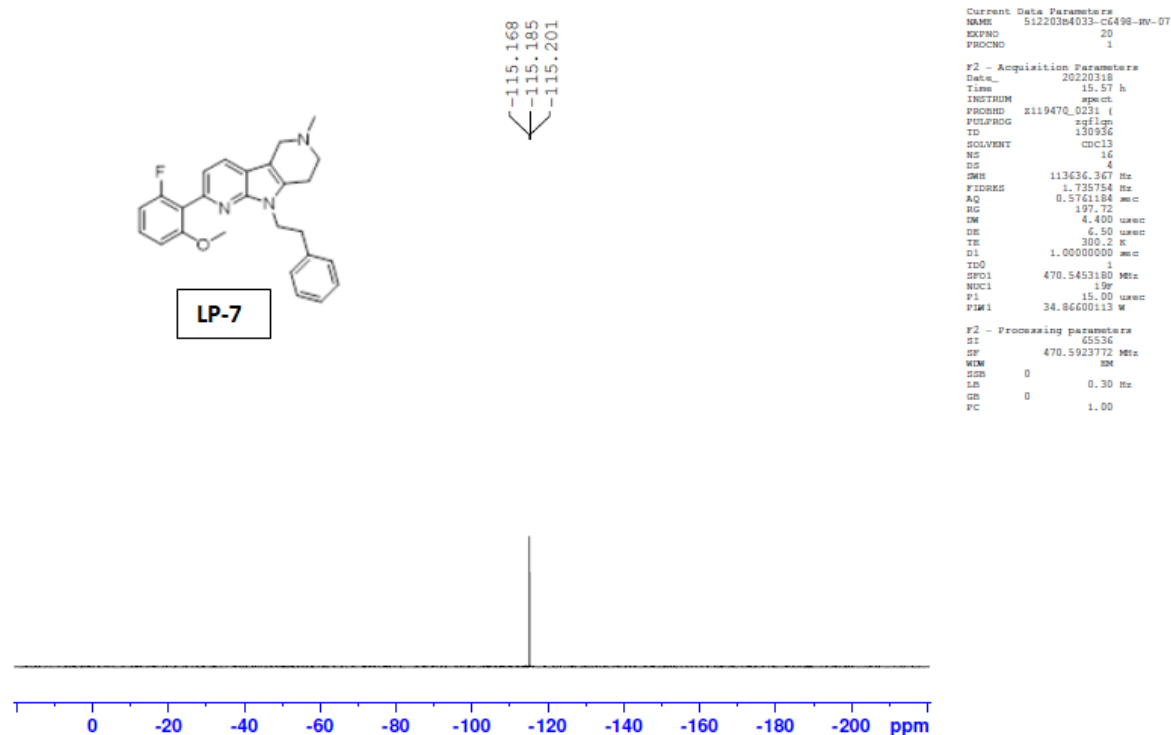

**<sup>19</sup>FNMR spectrum of 2-(2-Fluoro-6-methoxyphenyl)-6-methyl-9-phenethyl-6,7,8,9-tetrahydro-5H-pyrrolo[2,3-b:4,5-c']dipyridine (LP-7) in CDCl<sub>3</sub> (470 MHz)**

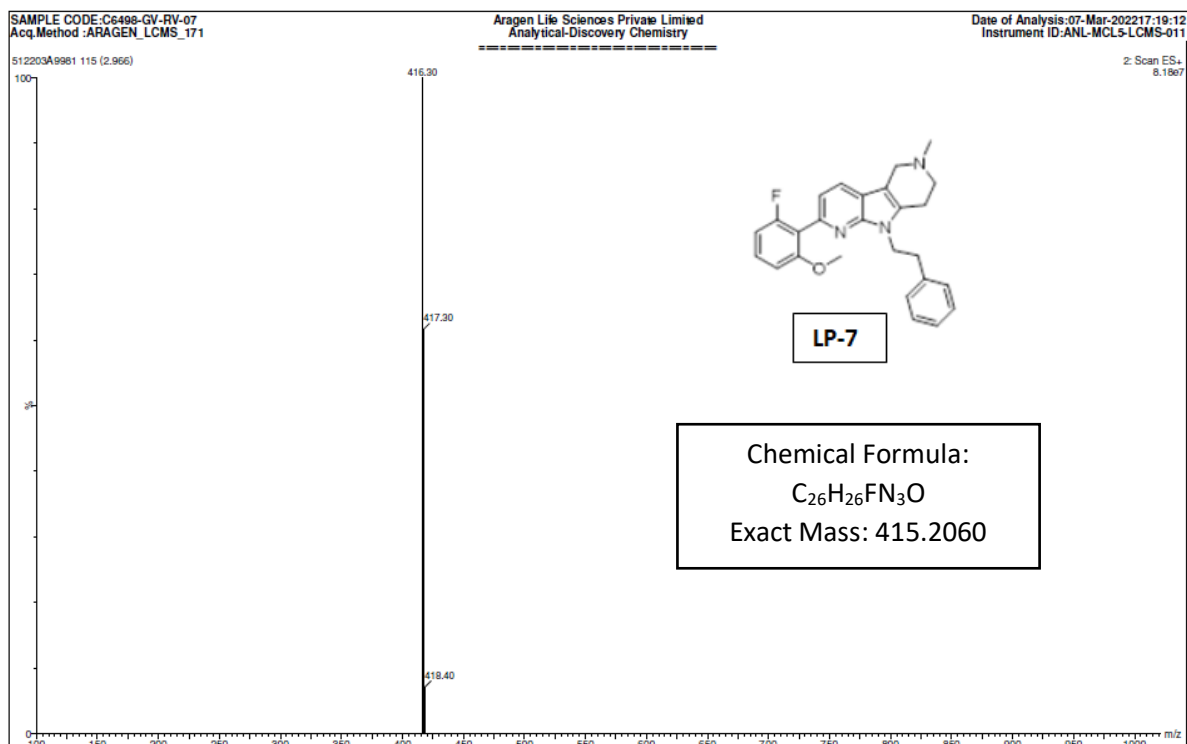

**MASS spectrum of 2-(2-Fluoro-6-methoxyphenyl)-6-methyl-9-phenethyl-6,7,8,9-tetrahydro-5H-pyrrolo[2,3-b:4,5-c']dipyridine (LP-7)**

**Elemental Composition Report**

Page 1

**Single Mass Analysis**

Tolerance = 500.0 PPM / DBE: min = -1.5, max = 50.0

Element prediction: Off

Number of isotope peaks used for i-FIT = 3

Monoisotopic Mass, Even Electron Ions

9 formula(e) evaluated with 1 results within limits (up to 50 best isotopic matches for each mass)

Elements Used:

C: 0-26 H: 0-27 N: 0-3 O: 0-1 F: 0-1

Sample Code: C6498-7

Acq Method: ARAGEN\_LCMS\_190

Aragen Life Sciences Private Limited  
Analytical Discovery Chemistry

Instrument ID :ANL-MCL3-LCMS-010  
Date of Analysis:16-Sep-2022 15:54:23

512209B4301 74 (1.897)

1: Scan ES+  
1.20e+008

**Elemental composition report of 2-(2-Fluoro-6-methoxyphenyl)-6-methyl-9-phenethyl-6,7,8,9-tetrahydro-5H-pyrrolo[2,3-b:4,5-c']dipyridine (LP-7)**

C6498-RV-08

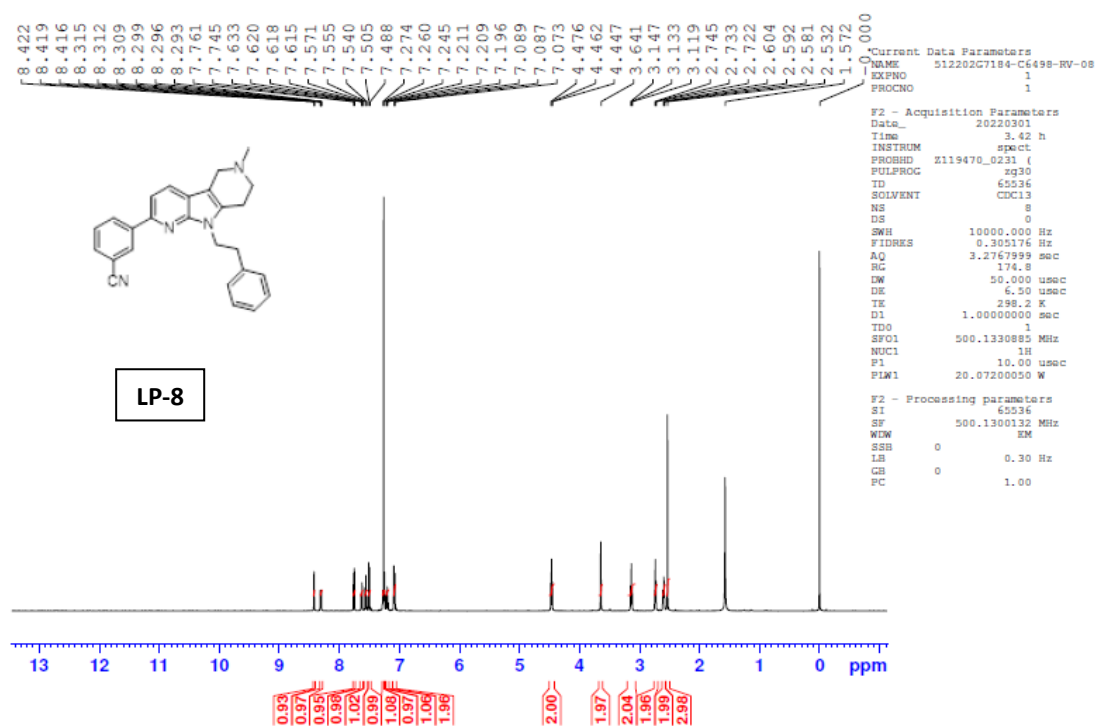

**<sup>1</sup>H NMR spectrum of 3-(6-Methyl-9-phenethyl-6,7,8,9-tetrahydro-5H-pyrrolo[2,3-b:4,5-c']dipyridin-2-yl)benzonitrile (LP-8) in CDCl<sub>3</sub> (500 MHz)**

C6498-RV-08

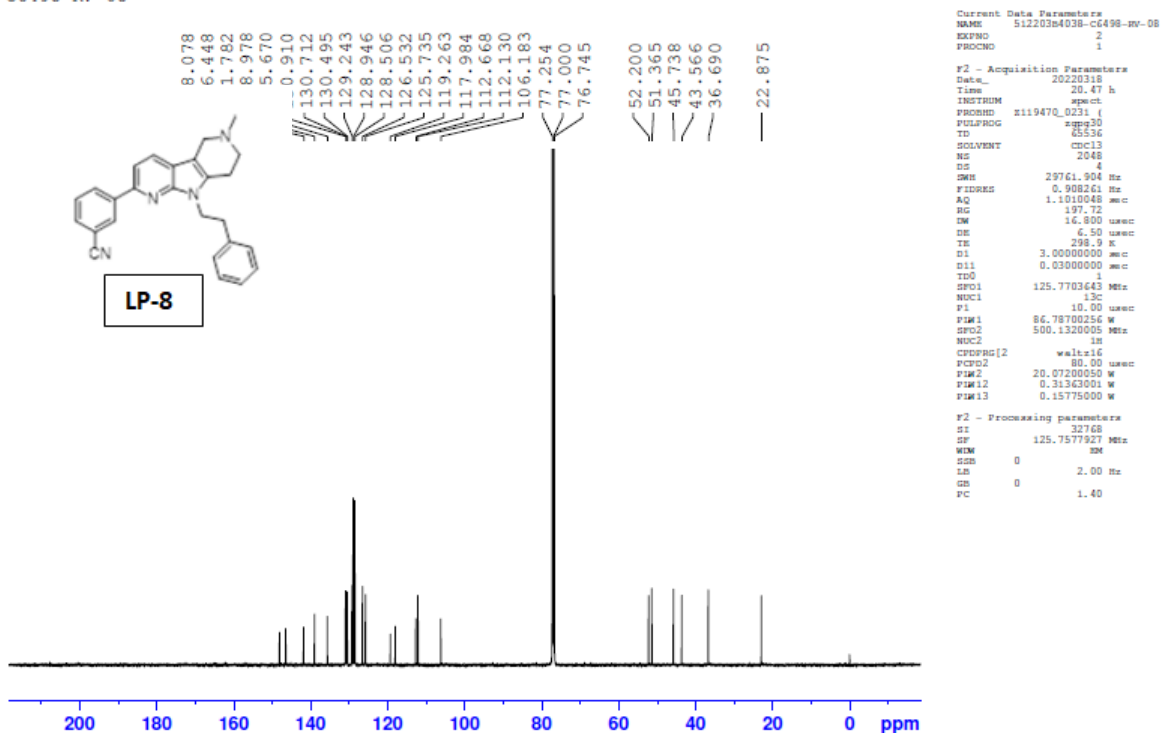

**<sup>13</sup>C NMR spectrum of 3-(6-Methyl-9-phenethyl-6,7,8,9-tetrahydro-5H-pyrrolo[2,3-b:4,5-c']dipyridin-2-yl)benzonitrile (LP-8) in CDCl<sub>3</sub> (125 MHz)**



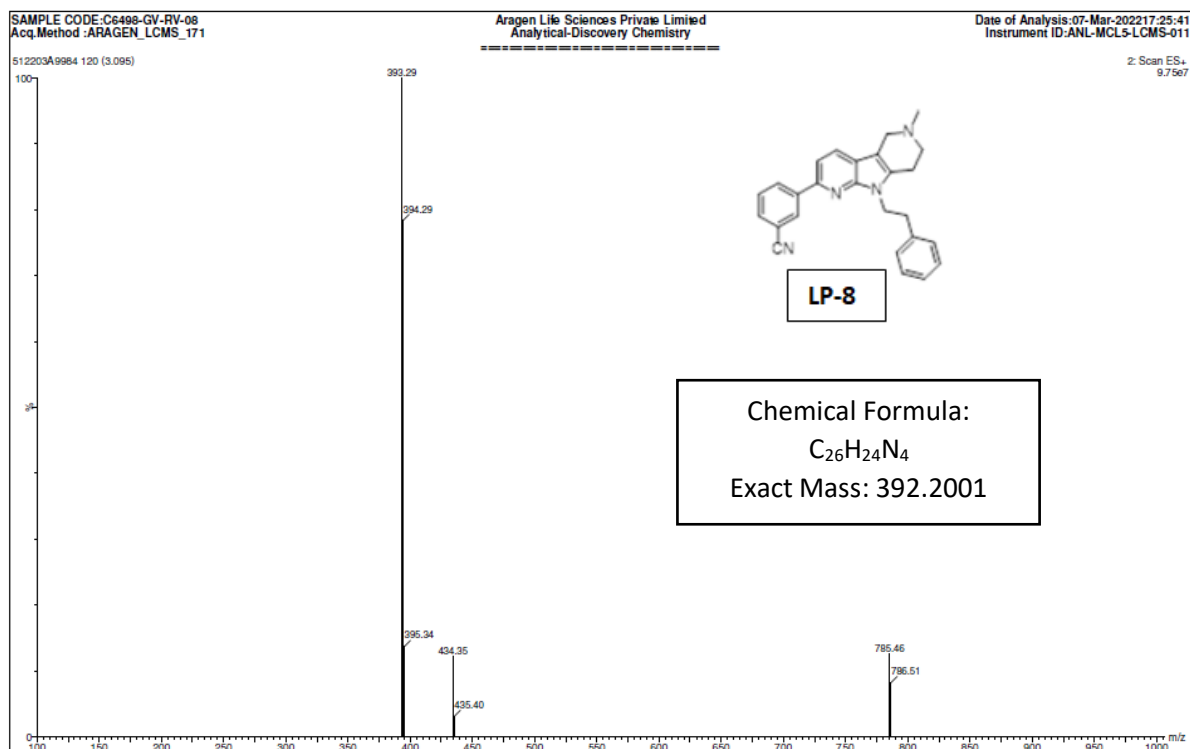

## MASS spectrum of 3-(6-Methyl-9-phenethyl-6,7,8,9-tetrahydro-5H-pyrrolo[2,3-b:4,5-c']dipyridin-2-yl)benzonitrile (LP-8)

### Elemental Composition Report

Page 1

#### Single Mass Analysis

Tolerance = 500.0 PPM / DBE: min = -1.5, max = 50.0

Element prediction: Off

Number of isotope peaks used for i-FIT = 3

Monoisotopic Mass, Even Electron Ions

3 formula(e) evaluated with 1 results within limits (up to 50 best isotopic matches for each mass)

Elements Used:

C: 0-26 H: 0-25 N: 0-4

Sample Code: C6498-8

Acq Method: ARAGEN\_LCMS\_190

Aragen Life Sciences Private Limited  
Analytical-Discovery Chemistry

Instrument ID: ANL-MCL3-LCMS-010  
Date of Analysis: 16-Sep-2022 16:00:30

512209B4302 74 (1.897)

1: Scan ES+  
9.77e+007

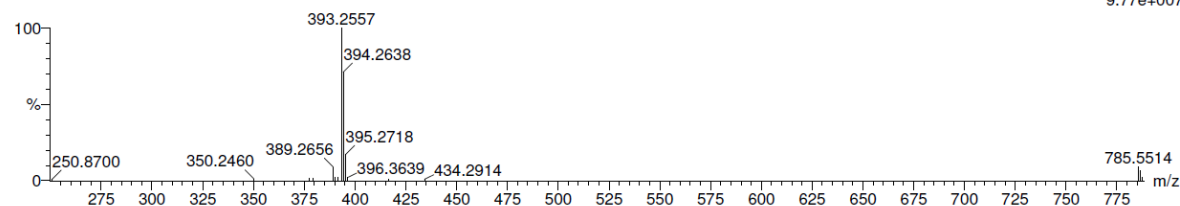

Minimum: -1.5  
Maximum: 50.0

| Mass     | Calc. Mass | mDa  | PPM  | DBE  | i-FIT | Norm | Conf (%) | Formula                                        |
|----------|------------|------|------|------|-------|------|----------|------------------------------------------------|
| 393.2065 | 393.2079   | -1.4 | -3.6 | 16.5 | 57.2  | n/a  | n/a      | C <sub>26</sub> H <sub>25</sub> N <sub>4</sub> |

## Elemental composition report of 3-(6-Methyl-9-phenethyl-6,7,8,9-tetrahydro-5H-pyrrolo[2,3-b:4,5-c']dipyridin-2-yl)benzonitrile (LP-8)

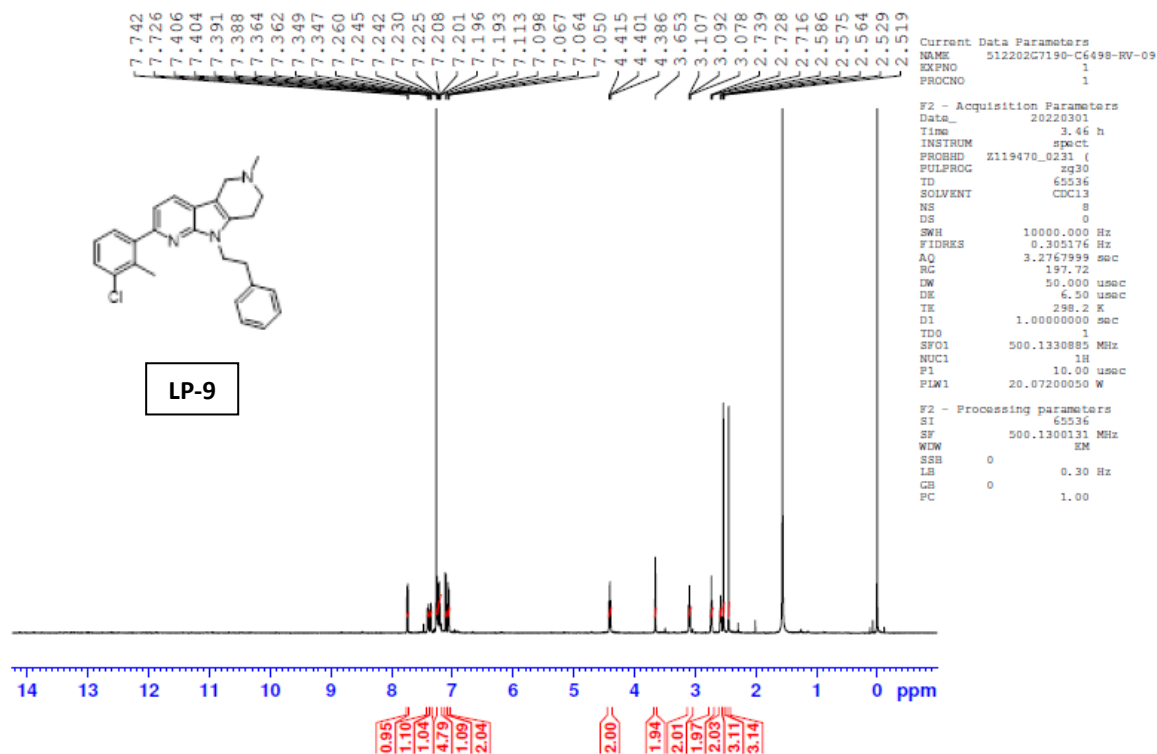

**<sup>1</sup>H NMR spectrum of 2-(3-Chloro-2-methylphenyl)-6-methyl-9-phenethyl-6,7,8,9-tetrahydro-5H-pyrrolo[2,3-b:4,5-c']dipyridine (LP-9) in CDCl<sub>3</sub> (500 MHz)**

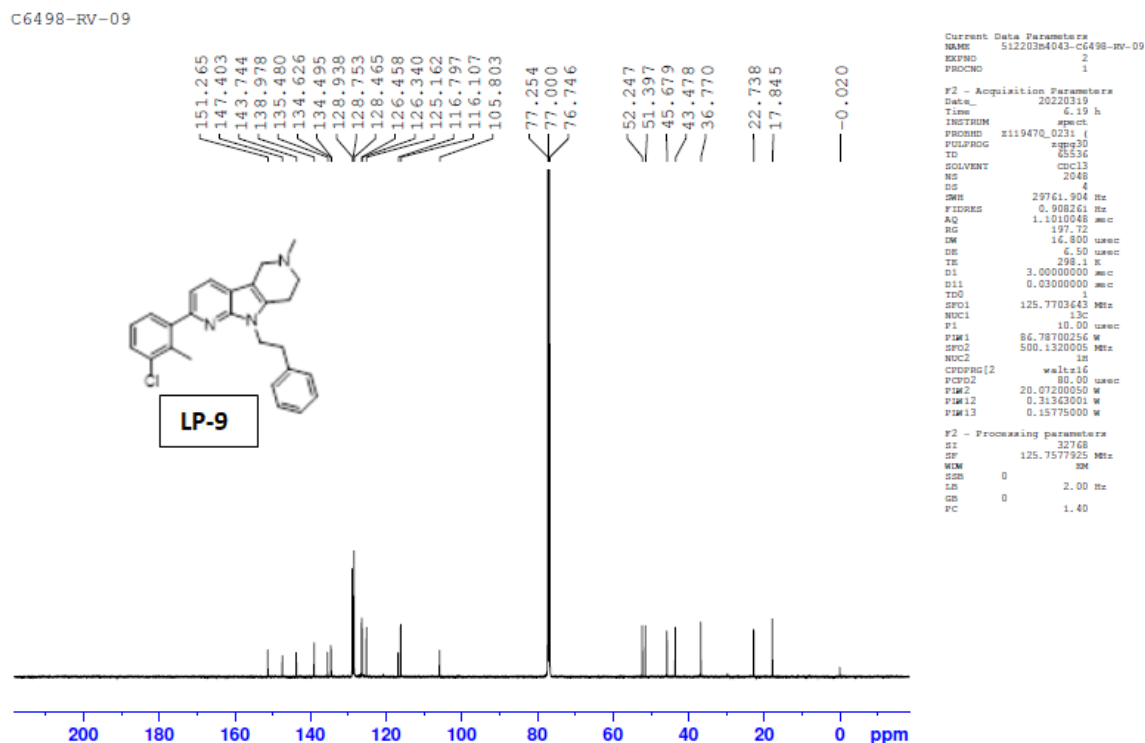

**<sup>13</sup>C NMR spectrum of 2-(3-Chloro-2-methylphenyl)-6-methyl-9-phenethyl-6,7,8,9-tetrahydro-5H-pyrrolo[2,3-b:4,5-c']dipyridine (LP-9) in CDCl<sub>3</sub> (125 MHz)**

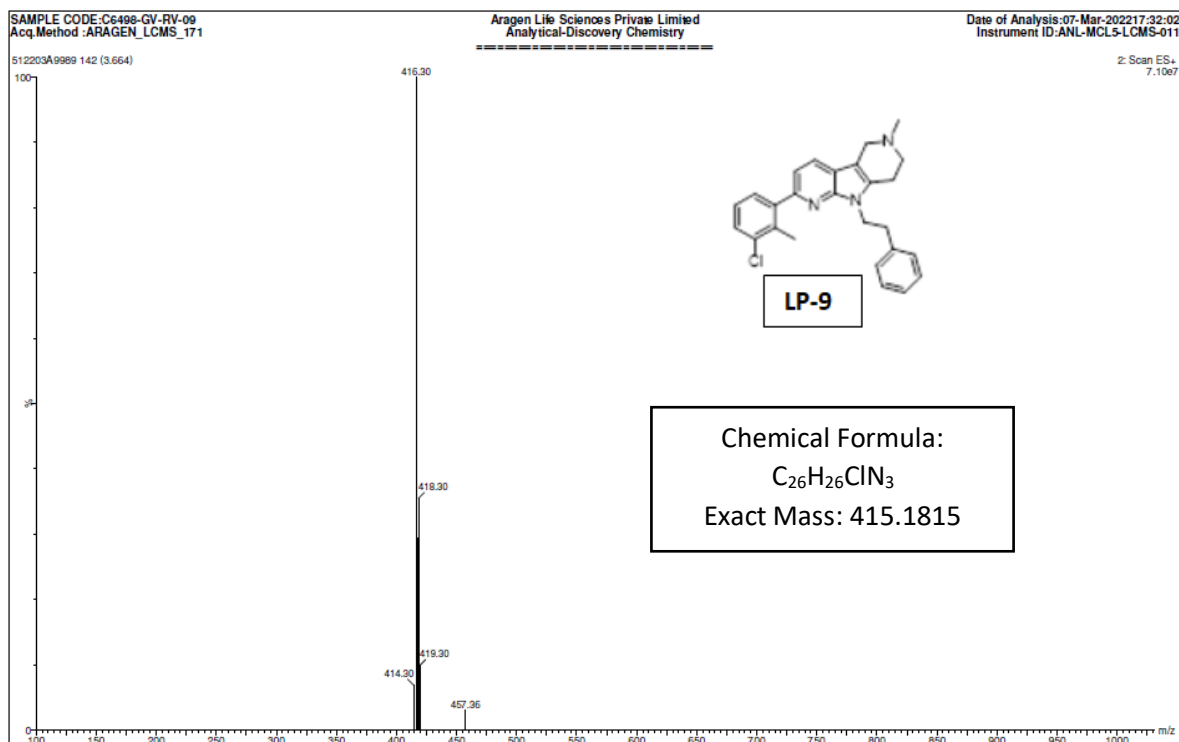

**MASS spectrum of 2-(3-Chloro-2-methylphenyl)-6-methyl-9-phenethyl-6,7,8,9-tetrahydro-5H-pyrrolo[2,3-b:4,5-c']dipyridine (LP-9)**

**Elemental Composition Report**

Page 1

**Single Mass Analysis**

Tolerance = 500.0 PPM / DBE: min = -1.5, max = 50.0

Element prediction: Off

Number of isotope peaks used for i-FIT = 3

Monoisotopic Mass, Even Electron Ions

5 formula(e) evaluated with 1 results within limits (up to 50 best isotopic matches for each mass)

Elements Used:

C: 0-26 H: 0-27 N: 0-3 Cl: 0-1

Sample Code: C6498-9

Acq Method: ARAGEN\_LCMS\_190

Aragen Life Sciences Private Limited  
Analytical-Discovery Chemistry

Instrument ID: ANL-MCL3-LCMS-010  
Date of Analysis: 16-Sep-2022 16:06:28

512209B4303 83 (2.130)

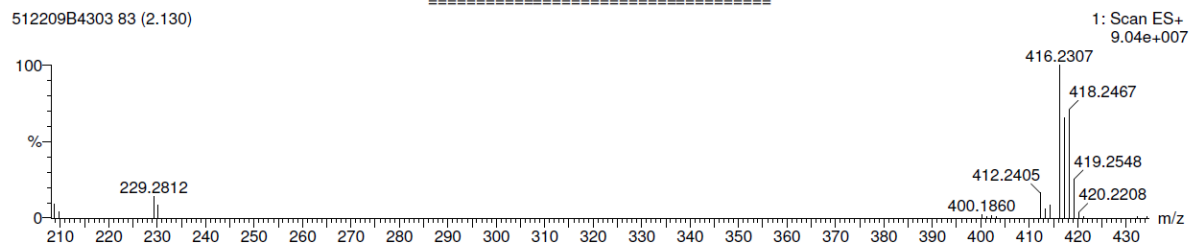

Minimum: -1.5  
Maximum: 5.0 500.0 50.0

| Mass     | Calc. Mass | mDa  | PPM  | DBE  | i-FIT | Norm | Conf(%) | Formula                                           |
|----------|------------|------|------|------|-------|------|---------|---------------------------------------------------|
| 416.1877 | 416.1894   | -1.7 | -4.1 | 14.5 | 63.8  | n/a  | n/a     | C <sub>26</sub> H <sub>27</sub> N <sub>3</sub> Cl |

**Elemental composition report of 2-(3-Chloro-2-methylphenyl)-6-methyl-9-phenethyl-6,7,8,9-tetrahydro-5H-pyrrolo[2,3-b:4,5-c']dipyridine (LP-9)**

C6498-RV-10

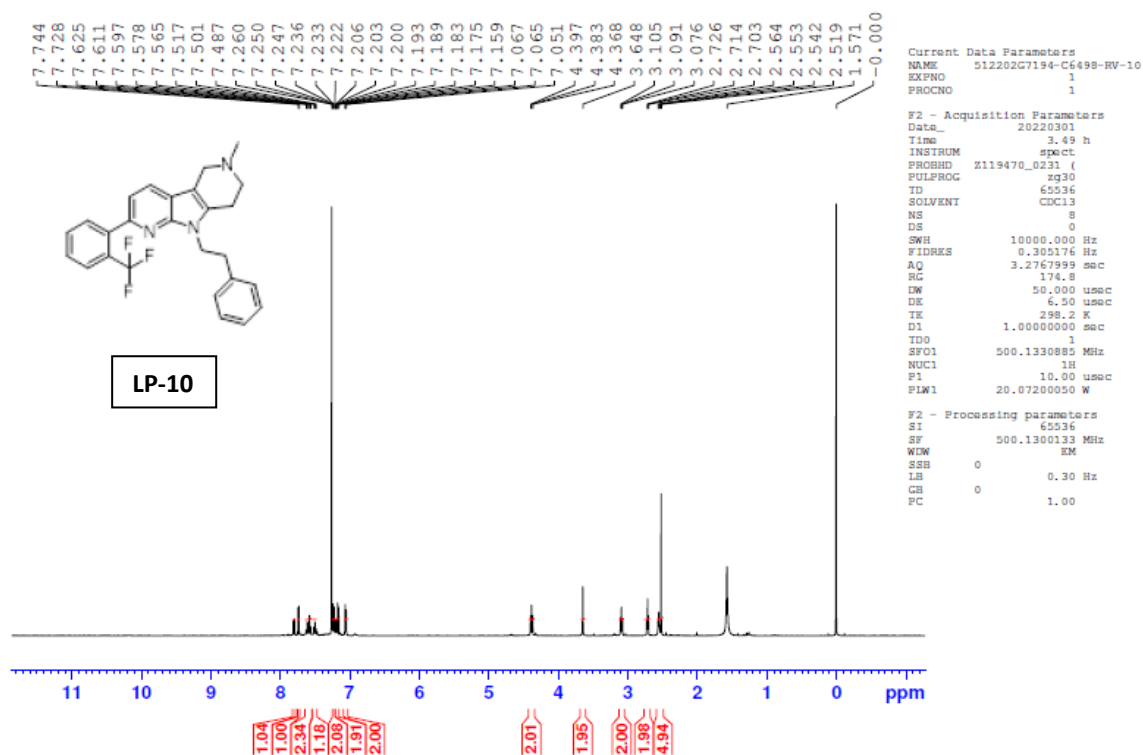

**<sup>1</sup>H NMR spectrum of 6-Methyl-9-phenethyl-2-(2-(trifluoromethyl)phenyl)-6,7,8,9-tetrahydro-5H-pyrrolo[2,3-b:4,5-c']dipyridine (LP-10) in CDCl<sub>3</sub> (500 MHz)**

C6498-RV-10

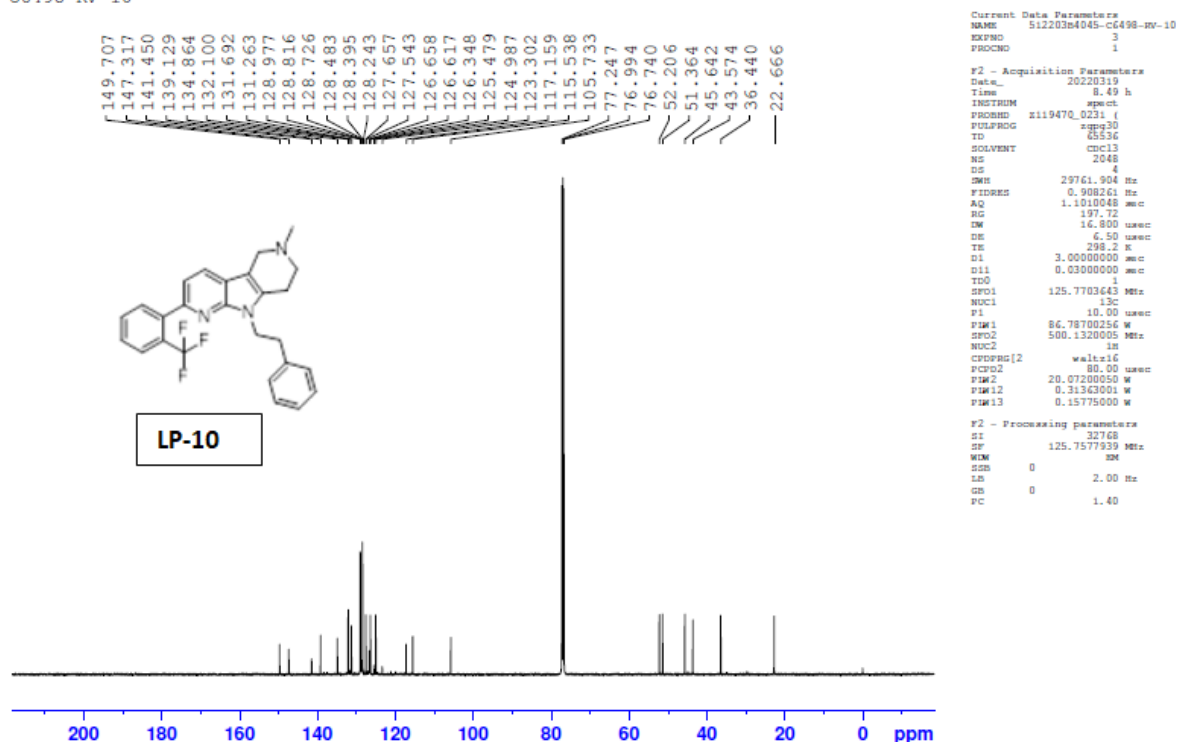

**<sup>13</sup>C NMR spectrum of 6-Methyl-9-phenethyl-2-(2-(trifluoromethyl)phenyl)-6,7,8,9-tetrahydro-5H-pyrrolo[2,3-b:4,5-c']dipyridine (LP-10) in CDCl<sub>3</sub> (125 MHz)**

C6498-RV-10

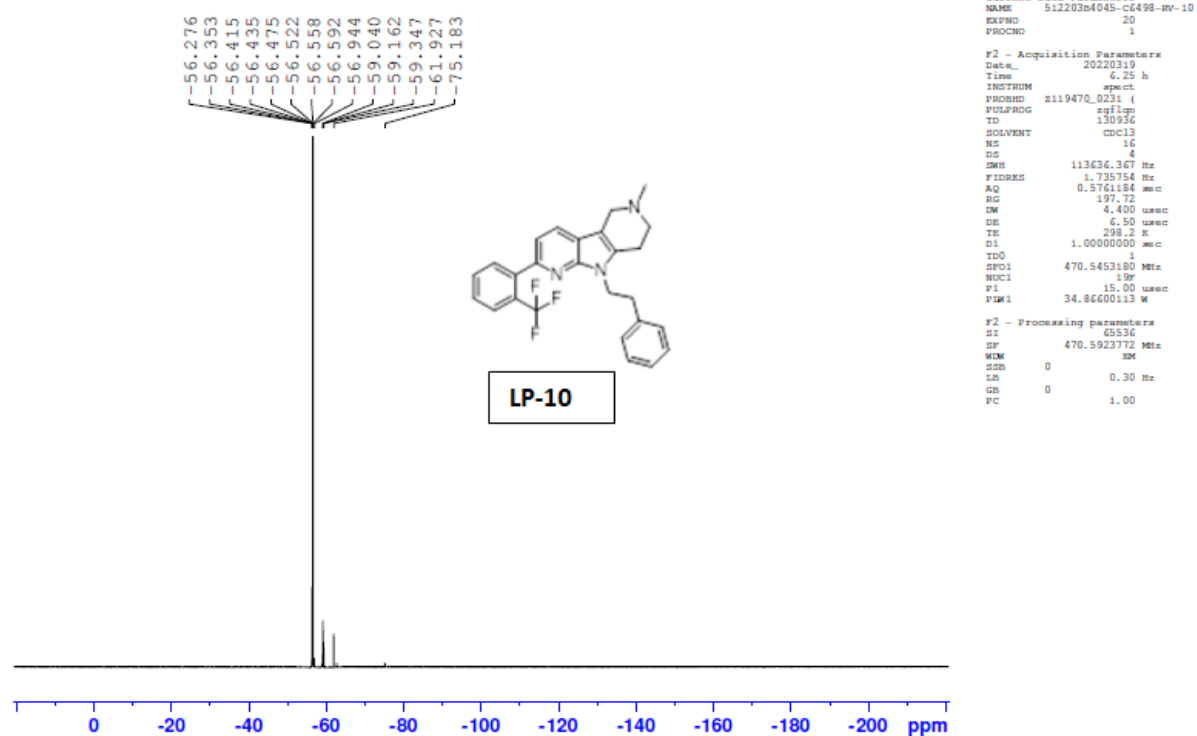

**<sup>19</sup>F NMR spectrum of 6-Methyl-9-phenethyl-2-(2-(trifluoromethyl)phenyl)-6,7,8,9-tetrahydro-5H-pyrrolo[2,3-b:4,5-c']dipyridine (LP-10) in CDCl<sub>3</sub> (470 MHz)**

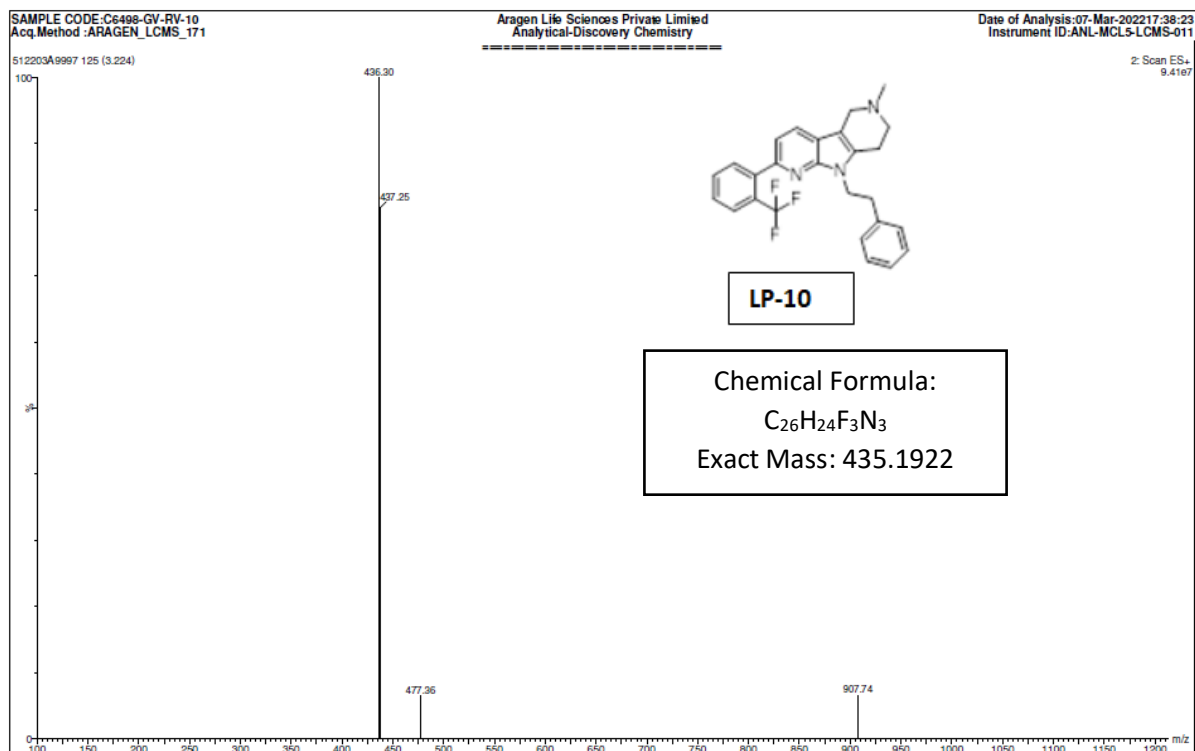

**MASS spectrum of 6-Methyl-9-phenethyl-2-(2-(trifluoromethyl)phenyl)-6,7,8,9-tetrahydro-5H-pyrrolo[2,3-b:4,5-c']dipyridine (LP-10)**

## Single Mass Analysis

Tolerance = 500.0 PPM / DBE: min = -1.5, max = 50.0

Element prediction: Off

Number of isotope peaks used for i-FIT = 3

Monoisotopic Mass, Even Electron Ions

11 formula(e) evaluated with 1 results within limits (up to 50 best isotopic matches for each mass)

Elements Used:

C: 0-26 H: 0-25 N: 0-3 F: 0-3

Sample Code: C6498-10

Acq Method: ARAGEN\_LCMS\_190

Aragen Life Sciences Private Limited  
Analytical Discovery ChemistryInstrument ID :ANL-MCL3-LCMS-010  
Date of Analysis:16-Sep-202216:12:26

512209B4304 78 (2.001)

1: Scan ES+  
9.88e+007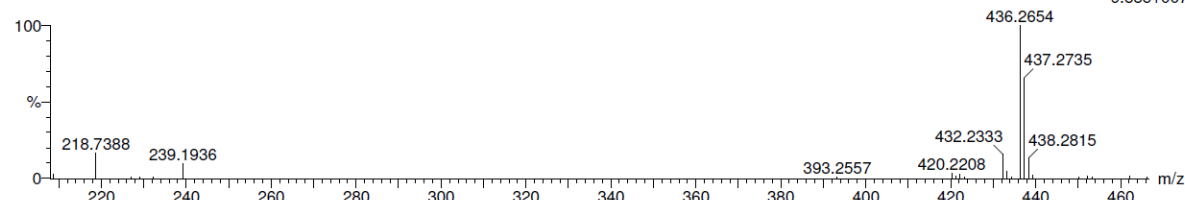

Minimum: -1.5  
Maximum: 5.0 500.0 50.0

| Mass     | Calc. Mass | mDa | PPM | DBE  | i-FIT | Norm | Conf(%) | Formula       |
|----------|------------|-----|-----|------|-------|------|---------|---------------|
| 436.2031 | 436.2001   | 3.0 | 6.9 | 14.5 | 56.3  | n/a  | n/a     | C26 H25 N3 F3 |

### Elemental composition report of 6-Methyl-9-phenethyl-2-(2-(trifluoromethyl)phenyl)-6,7,8,9-tetrahydro-5H-pyrrolo[2,3-b:4,5-c']dipyridine (LP-10)

C6498-RV-12

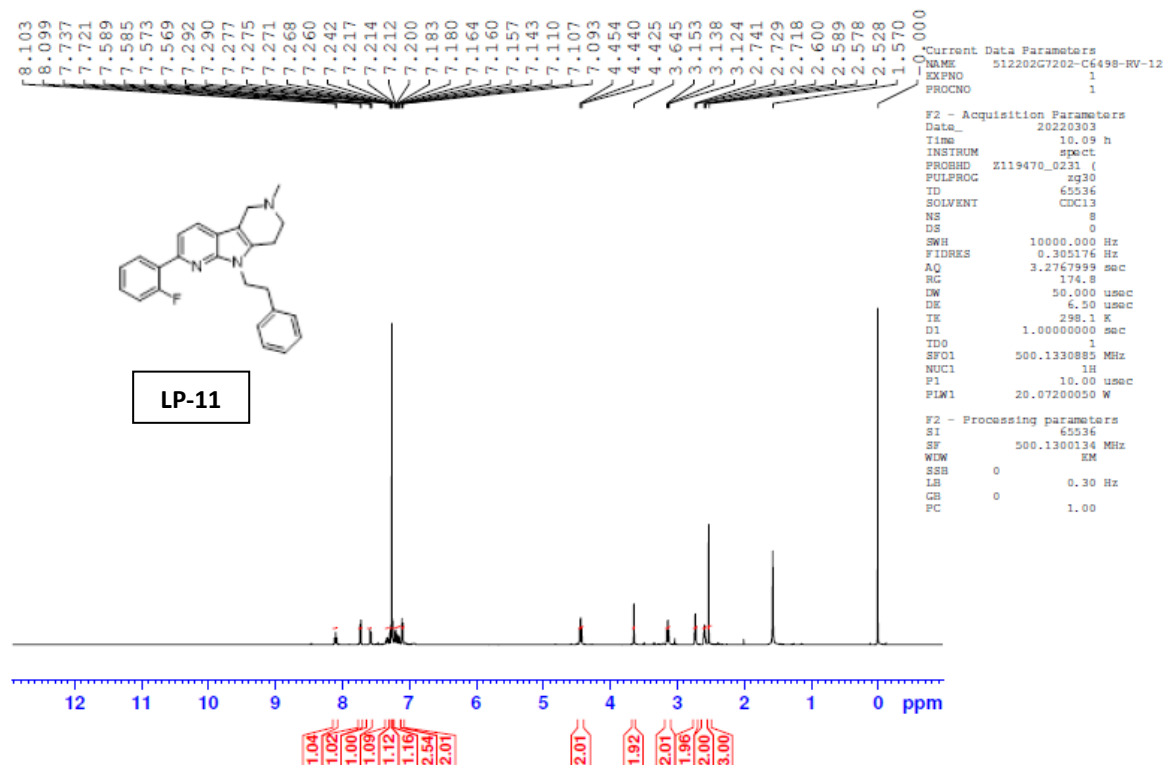

**<sup>1</sup>H NMR spectrum of 2-(2-Fluorophenyl)-6-methyl-9-phenethyl-6,7,8,9-tetrahydro-5H-pyrrolo[2,3-b:4,5-c']dipyridine: (LP-11) in CDCl<sub>3</sub> (500 MHz)**

C6498-RV-12

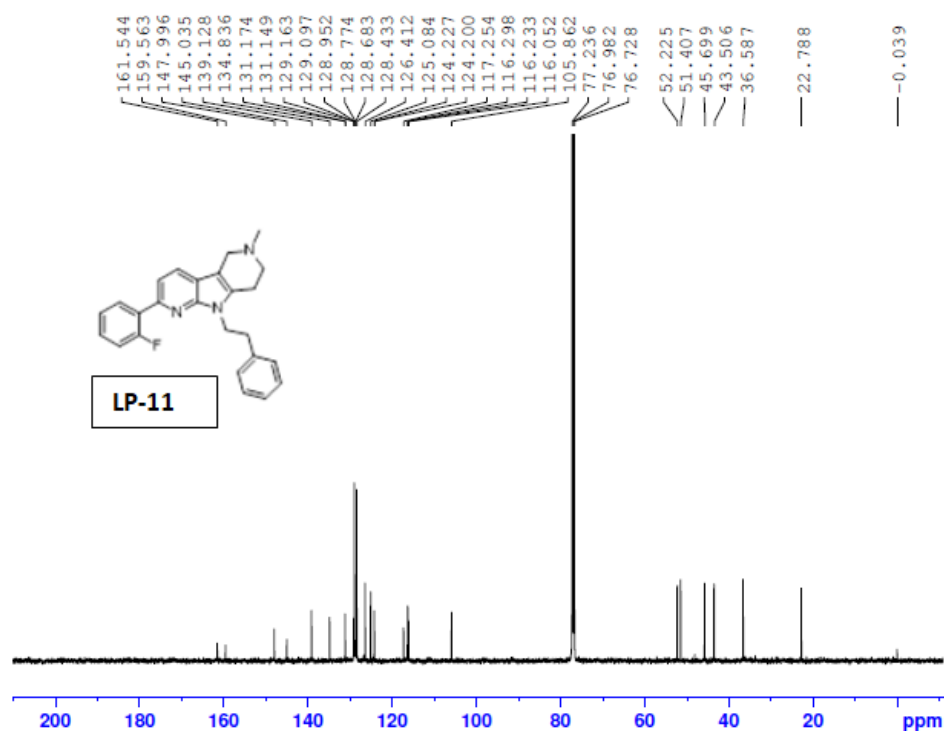

Current Data Parameters  
 NAME 512203b4057-c6498-rv-12  
 EXPNO 1  
 PROCNO 1

F2 - Acquisition Parameters  
 Date\_ 20220312  
 Time 21.25 h  
 INSTRUM spect  
 PROBRD z119470\_0231 (   
 PULPROG zgpg30  
 TD 65536  
 SOLVENT cdcl3  
 NS 2048  
 DS 4  
 SWH 29761.904 Hz  
 FIDRES 0.908261 Hz  
 AQ 1.1010048 sec  
 RG 197.72  
 SW 16.800 usec  
 DE 6.50 usec  
 TE 298.2 K  
 D1 2.00000000 sec  
 D11 0.03000000 sec  
 TD0 1  
 SFO1 125.7703643 MHz  
 NUC1 13C  
 P1 10.00 usec  
 FWH1 86.78700256 W  
 SFO2 500.1320885 MHz  
 NUC2 1H  
 CPDPRG2 waltz16  
 PCPD2 80.00 usec  
 FWH2 20.07200050 W  
 FWH12 0.31363001 W  
 FWH13 0.15775000 W

F2 - Processing parameters  
 SI 32768  
 SF 125.7577947 MHz  
 WMW 8M  
 SGB 0  
 LB 2.00 Hz  
 GB 0  
 PC 1.40

**<sup>13</sup>CNMR spectrum of 2-(2-Fluorophenyl)-6-methyl-9-phenethyl-6,7,8,9-tetrahydro-5H-pyrrolo[2,3-b:4,5-c']dipyridine (LP-11) in CDCl<sub>3</sub> (125 MHz)**

C6498-RV-12

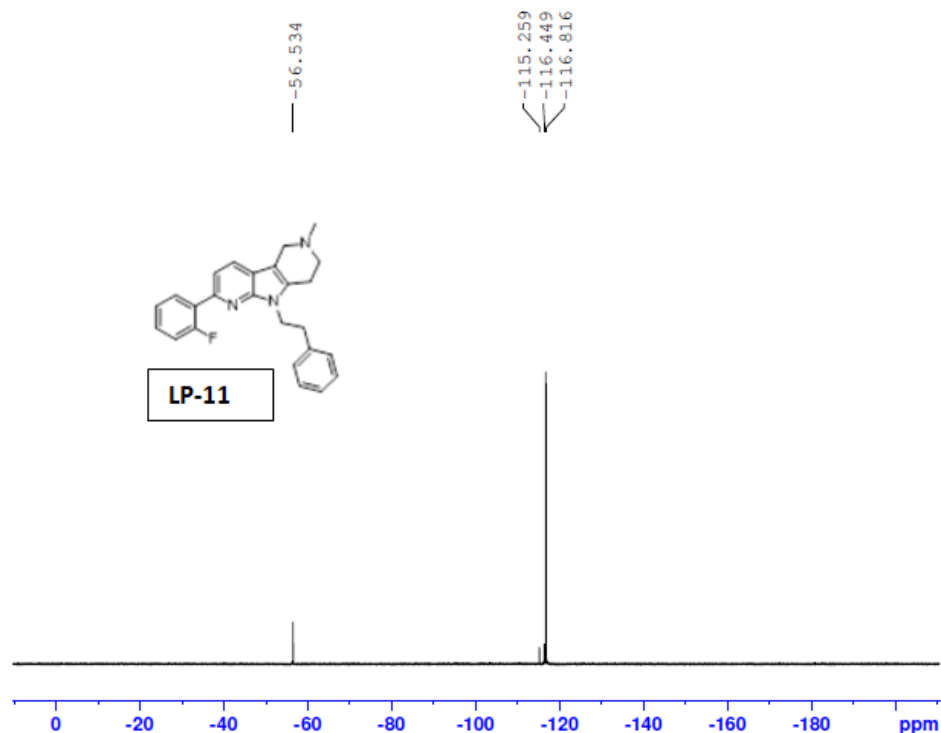

Current Data Parameters  
 NAME 512203b4057-c6498-rv-12  
 EXPNO 16  
 PROCNO 1

F2 - Acquisition Parameters  
 Date\_ 20220312  
 Time 21.27 h  
 INSTRUM spect  
 PROBRD z119470\_0231 (   
 PULPROG zgpg30  
 TD 130936  
 SOLVENT cdcl3  
 NS 16  
 DS 4  
 SWH 113636.367 Hz  
 FIDRES 1.735754 Hz  
 AQ 0.5761184 sec  
 RG 197.72  
 SW 4.400 usec  
 DE 6.50 usec  
 TE 298.1 K  
 D1 1.00000000 sec  
 TD0 1  
 SFO1 470.5453180 MHz  
 NUC1 19F  
 P1 15.00 usec  
 FWH1 34.86600113 W

F2 - Processing parameters  
 SI 65536  
 SF 470.5923772 MHz  
 WMW 8M  
 SGB 0  
 LB 2.00 Hz  
 GB 0  
 PC 1.00

**<sup>19</sup>FNMR spectrum of 2-(2-Fluorophenyl)-6-methyl-9-phenethyl-6,7,8,9-tetrahydro-5H-pyrrolo[2,3-b:4,5-c']dipyridine (LP-11) in CDCl<sub>3</sub> (470 MHz)**

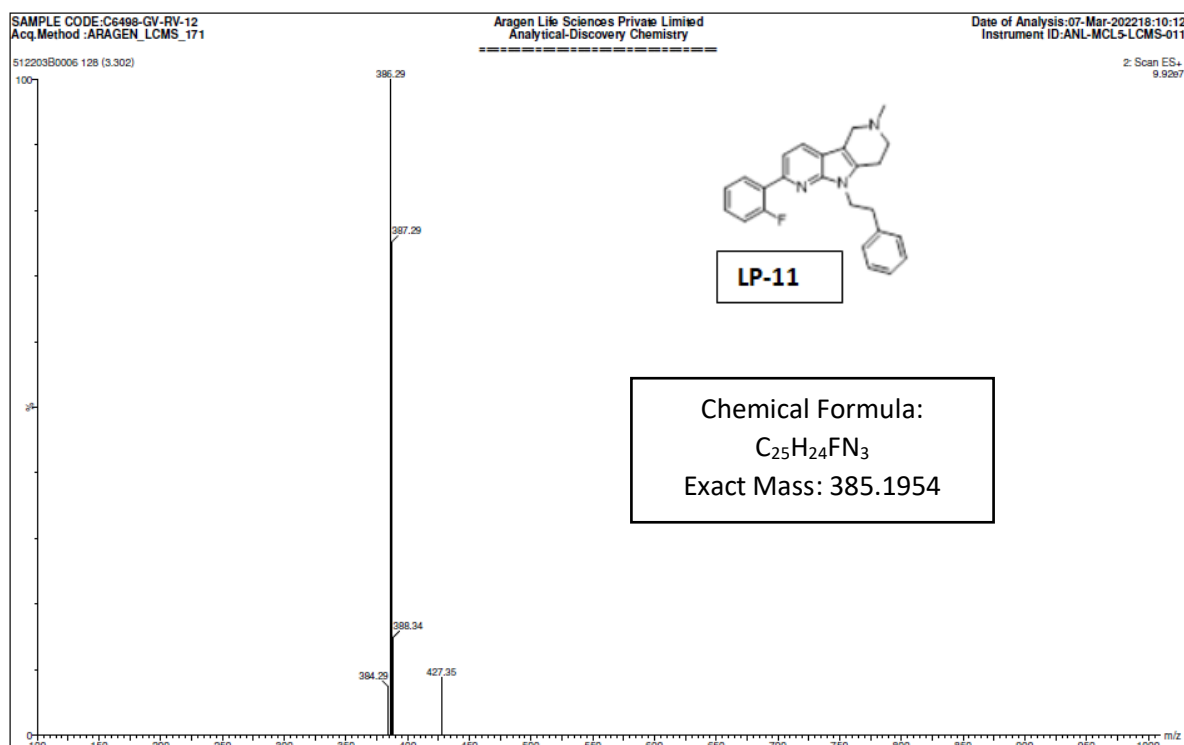

**MASS spectrum of 2-(2-Fluorophenyl)-6-methyl-9-phenethyl-6,7,8,9-tetrahydro-5H-pyrrolo[2,3-b:4,5-c']dipyridine (LP-11)**

## Elemental Composition Report

Page 1

### Single Mass Analysis

Tolerance = 820.0 PPM / DBE: min = -1.5, max = 50.0

Element prediction: Off

Number of isotope peaks used for i-FIT = 3

Monoisotopic Mass, Even Electron Ions

4 formula(e) evaluated with 1 results within limits (up to 50 best isotopic matches for each mass)

Elements Used:

C: 0-25 H: 0-25 N: 0-3 F: 0-1

C6498-12

Acq.method formic acid\_4min

Aragene Life sciences Private Limited  
Analytical-Discovery Chemistry

08-Sep-2022

23:56:09

INSTRUMENT-ID: ANL-MCL5-LCMS-013

1: Scan ES+

2.11e+007

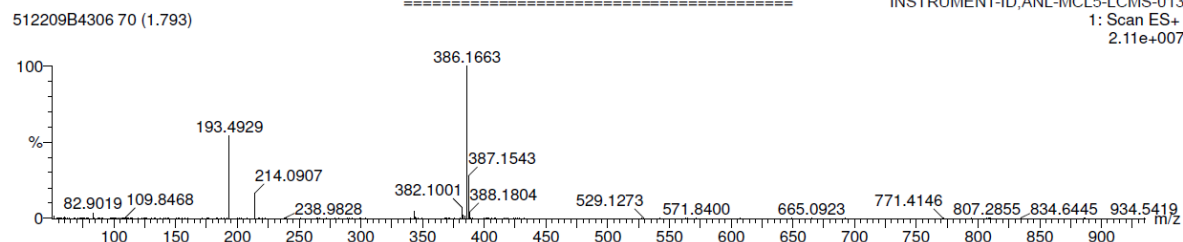

Minimum: -1.5  
Maximum: 5.0 820.0 50.0

| Mass     | Calc. Mass | mDa  | PPM  | DBE  | i-FIT | Norm | Conf (%) | Formula            |
|----------|------------|------|------|------|-------|------|----------|--------------------|
| 386.2001 | 386.2033   | -3.2 | -8.3 | 14.5 | 39.8  | n/a  | n/a      | $C_{25}H_{25}N_3F$ |

**Elemental composition report of 2-(2-Fluorophenyl)-6-methyl-9-phenethyl-6,7,8,9-tetrahydro-5H-pyrrolo[2,3-b:4,5-c']dipyridine (LP-11)**



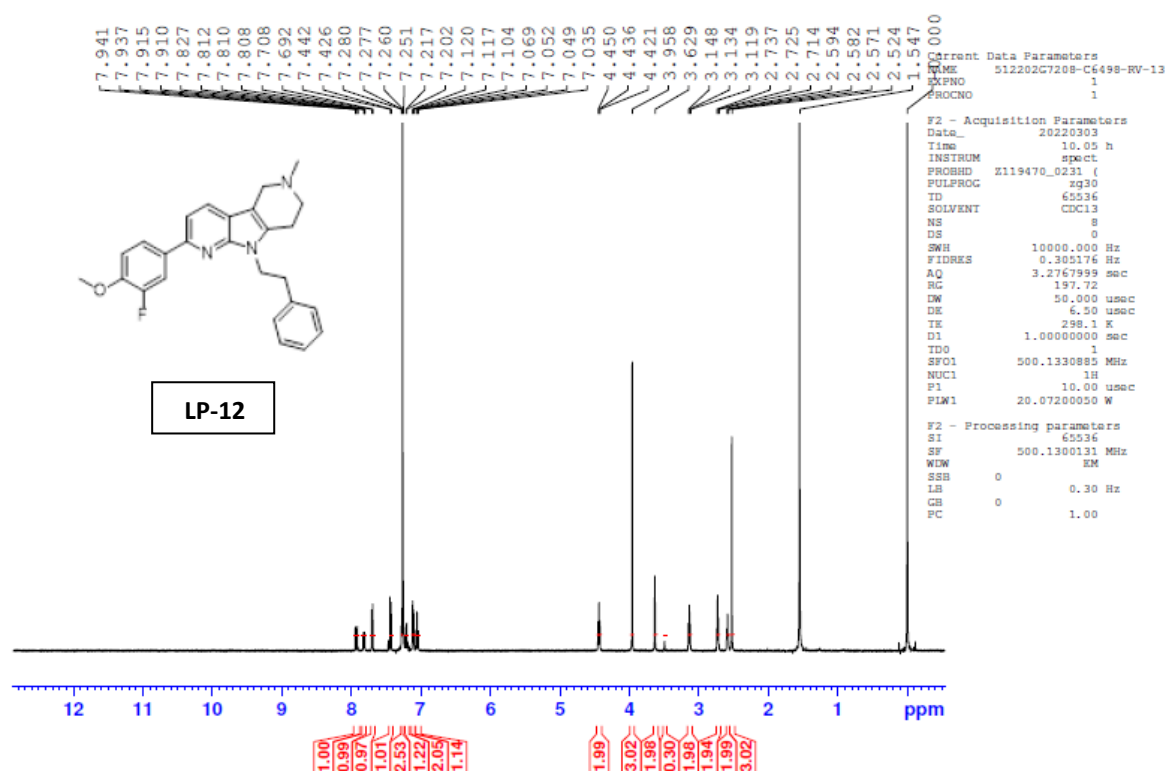

**<sup>1</sup>H NMR spectrum of 2-(3-Fluoro-4-methoxyphenyl)-6-methyl-9-phenethyl-6,7,8,9-tetrahydro-5H-pyrrolo[2,3-b:4,5-c']dipyridine (LP-12) in CDCl<sub>3</sub> (500 MHz)**

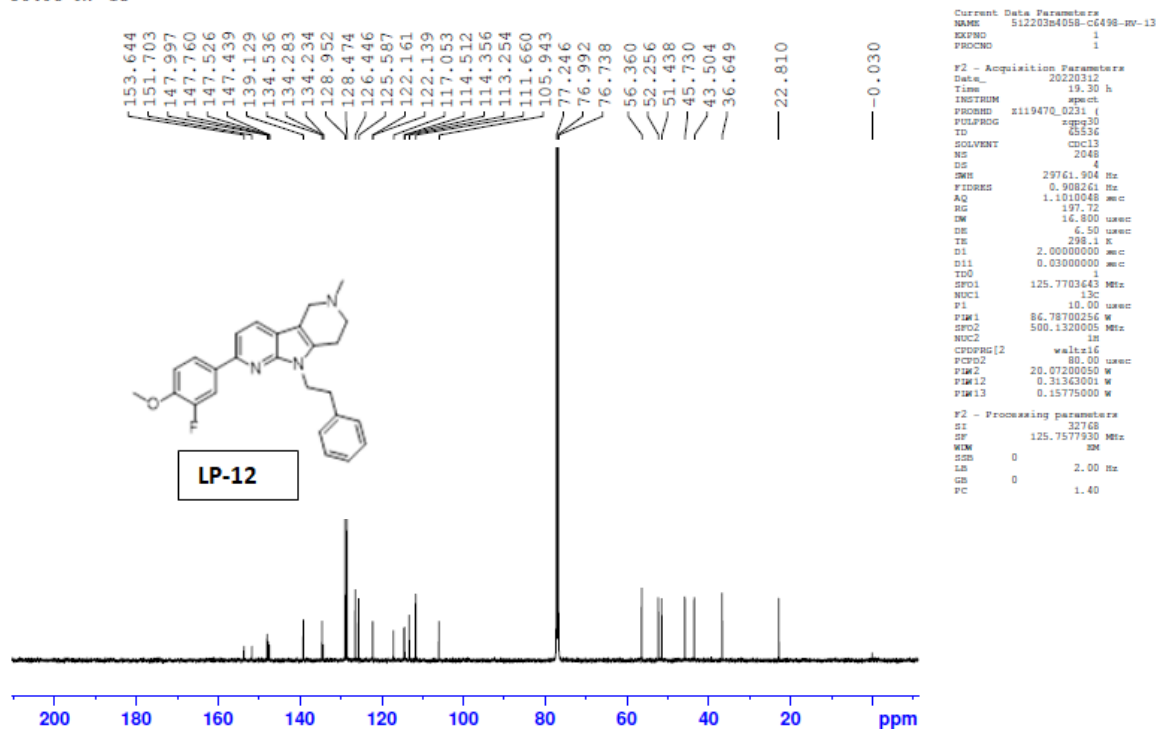

**<sup>13</sup>C NMR spectrum of 2-(3-Fluoro-4-methoxyphenyl)-6-methyl-9-phenethyl-6,7,8,9-tetrahydro-5H-pyrrolo[2,3-b:4,5-c']dipyridine (LP-12) in CDCl<sub>3</sub> (125 MHz)**

C6498-RV-13

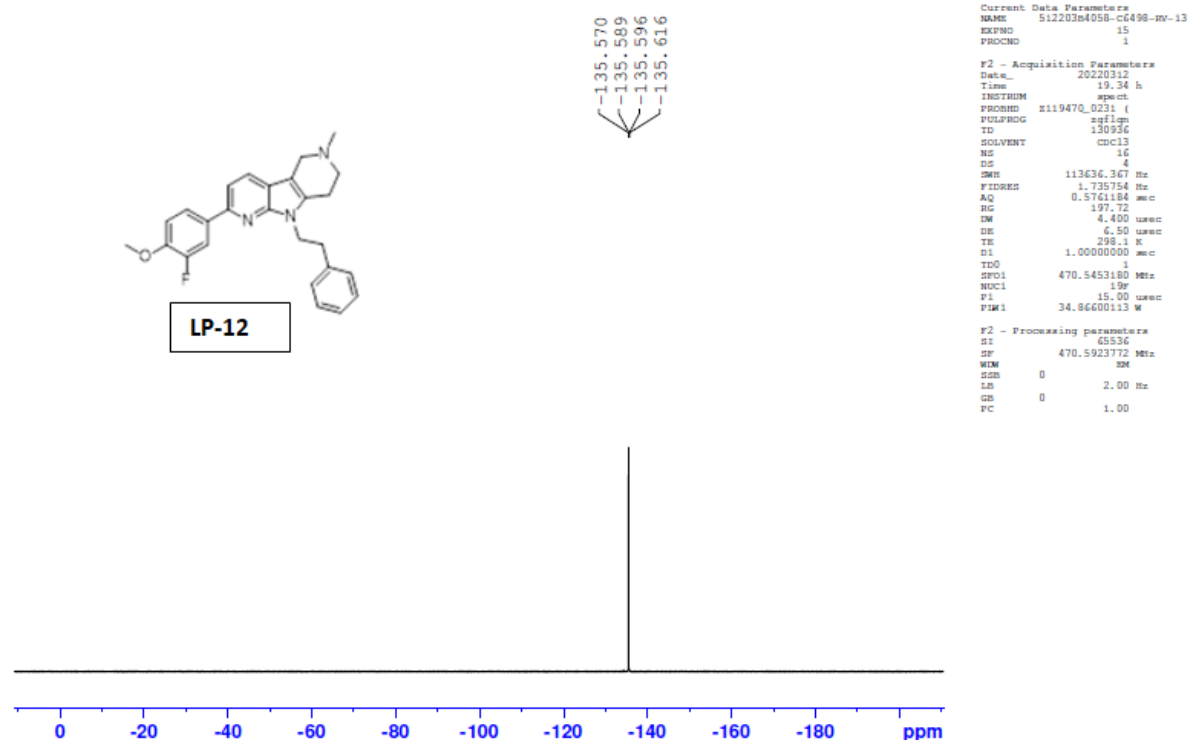

**<sup>19</sup>F NMR spectrum of 2-(3-Fluoro-4-methoxyphenyl)-6-methyl-9-phenethyl-6,7,8,9-tetrahydro-5H-pyrrolo[2,3-b:4,5-c']dipyridine (LP-12) in CDCl<sub>3</sub> (470 MHz)**

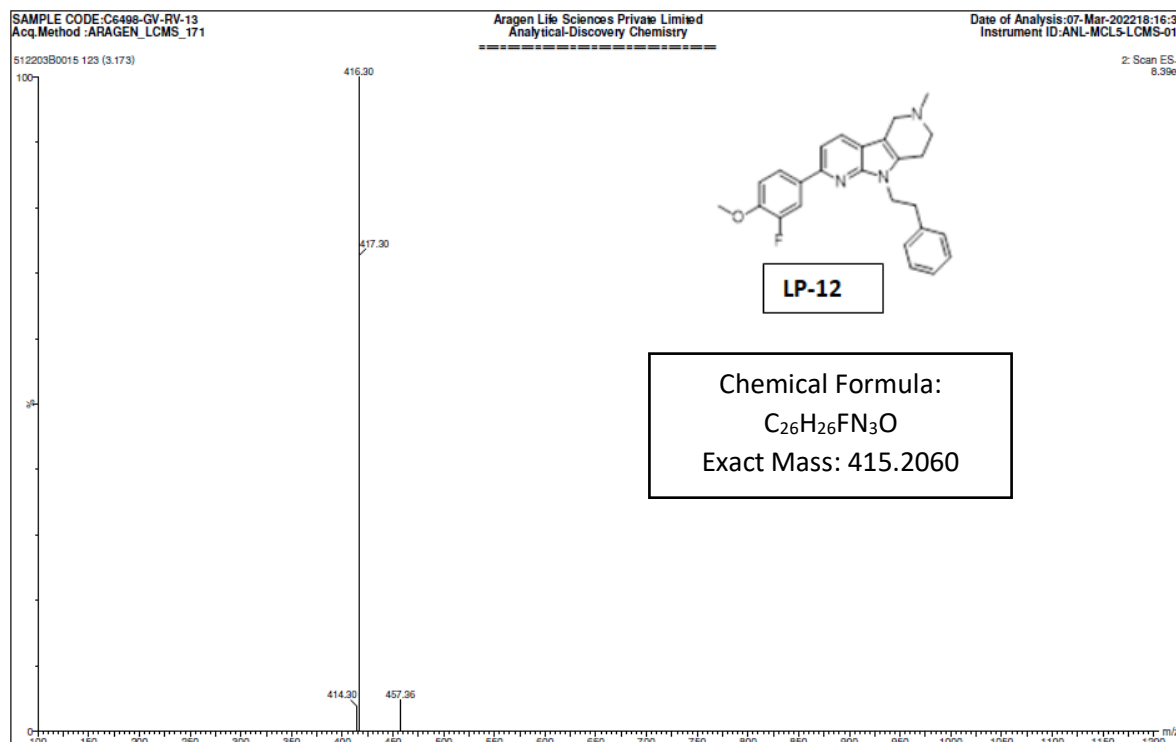

**MASS spectrum of 2-(3-Fluoro-4-methoxyphenyl)-6-methyl-9-phenethyl-6,7,8,9-tetrahydro-5H-pyrrolo[2,3-b:4,5-c']dipyridine (LP-12)**

## Elemental Composition Report

Page 1

### Single Mass Analysis

Tolerance = 820.0 PPM / DBE: min = -1.5, max = 50.0

Element prediction: Off

Number of isotope peaks used for i-FIT = 3

Monoisotopic Mass, Even Electron Ions

9 formula(e) evaluated with 1 results within limits (up to 50 best isotopic matches for each mass)

Elements Used:

C: 0-26 H: 0-27 N: 0-3 O: 0-1 F: 0-1

C6498-13

Acq.method formic acid\_4min

Aragene Life sciences Private Limited  
Analytical-Discovery Chemistry

09-Sep-2022

00:01:02

INSTRUMENT-ID;ANL-MCL5-LCMS-013

1: Scan ES+

4.28e+007

512209B4307 68 (1.742)

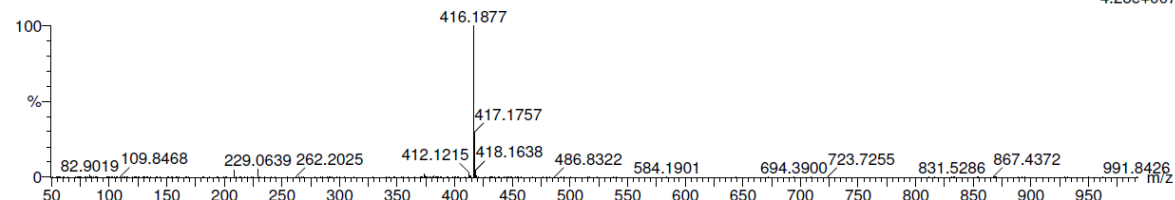

Minimum: -1.5  
Maximum: 50.0

| Mass     | Calc. Mass | mDa  | PPM  | DBE  | i-FIT | Norm | Conf(%) | Formula        |
|----------|------------|------|------|------|-------|------|---------|----------------|
| 416.2130 | 416.2138   | -0.8 | -1.9 | 14.5 | 38.6  | n/a  | n/a     | C26 H27 N3 O F |

## Elemental composition report of 2-(3-Fluoro-4-methoxyphenyl)-6-methyl-9-phenethyl-6,7,8,9-tetrahydro-5H-pyrrolo[2,3-b:4,5-c']dipyridine (LP-12)

C6498-RV-14

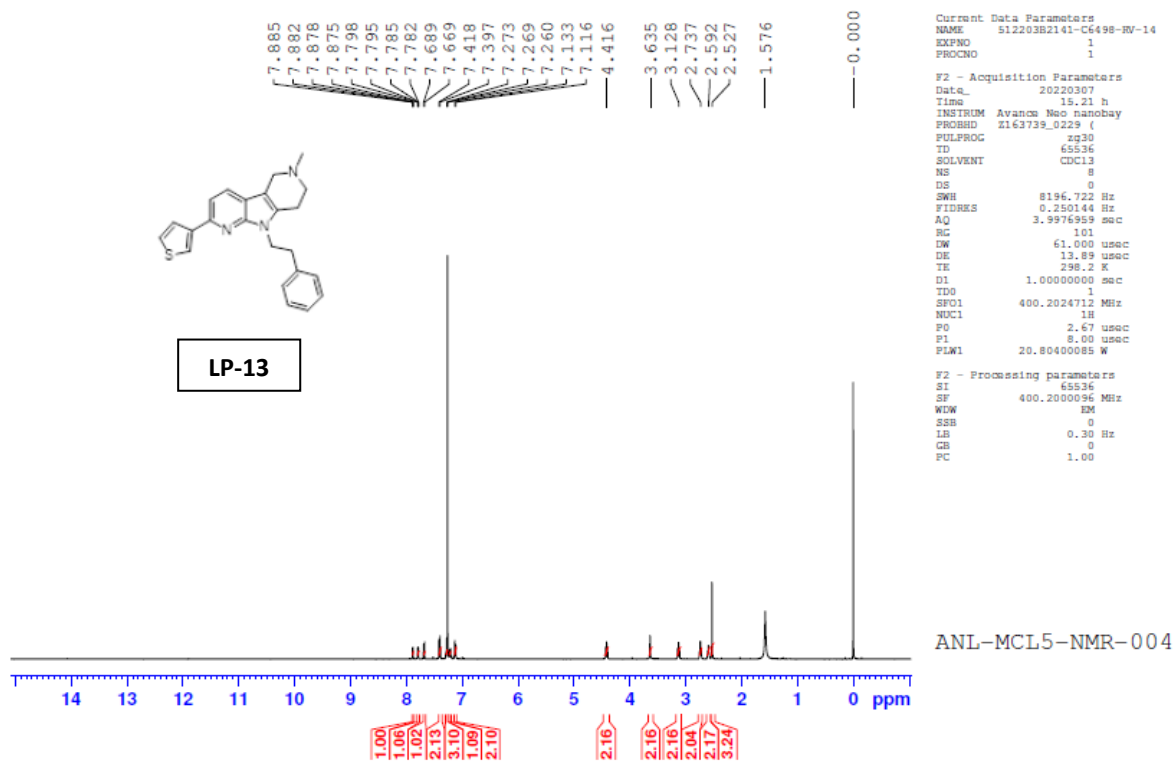

<sup>1</sup>H NMR spectrum of 6-Methyl-9-phenethyl-2-(thiophen-3-yl)-6,7,8,9-tetrahydro-5H-pyrrolo[2,3-b:4,5-c']dipyridine (LP-13) in CDCl<sub>3</sub> (400 MHz)

C6498-RV-14

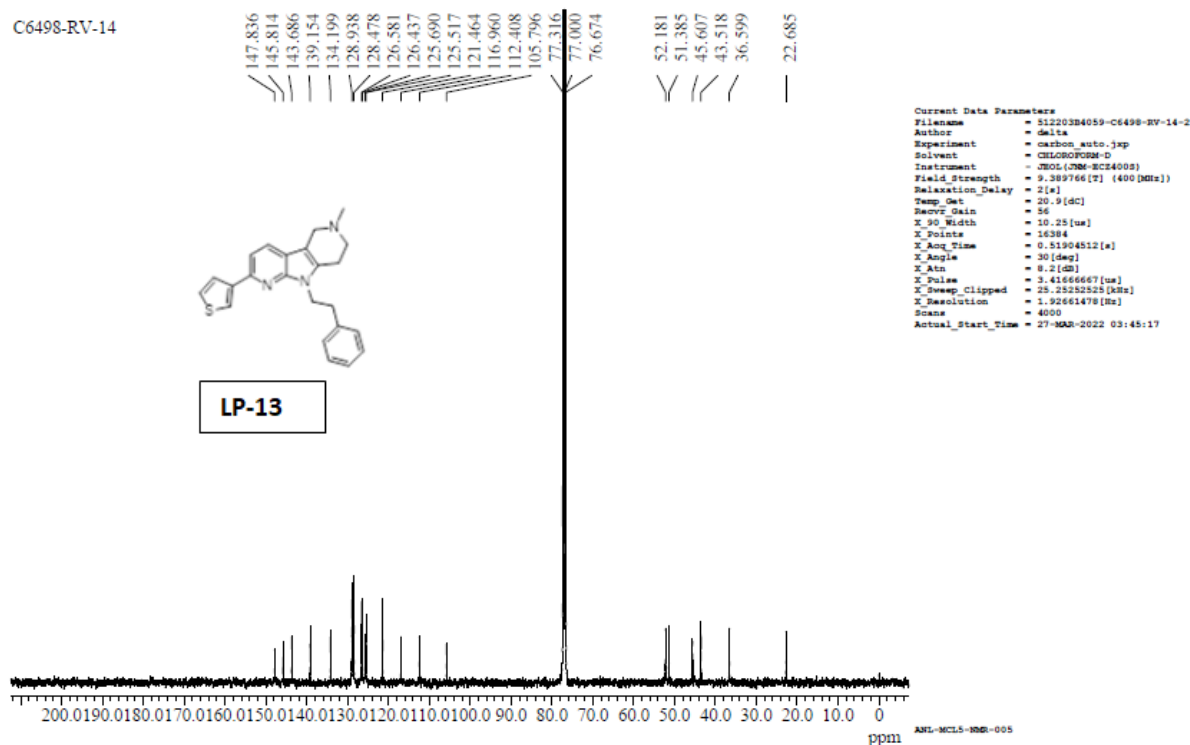

**<sup>13</sup>CNMR spectrum of 6-Methyl-9-phenethyl-2-(thiophen-3-yl)-6,7,8,9-tetrahydro-5H-pyrrolo[2,3-b:4,5-c']dipyridine (LP-13) in CDCl<sub>3</sub> (100 MHz)**

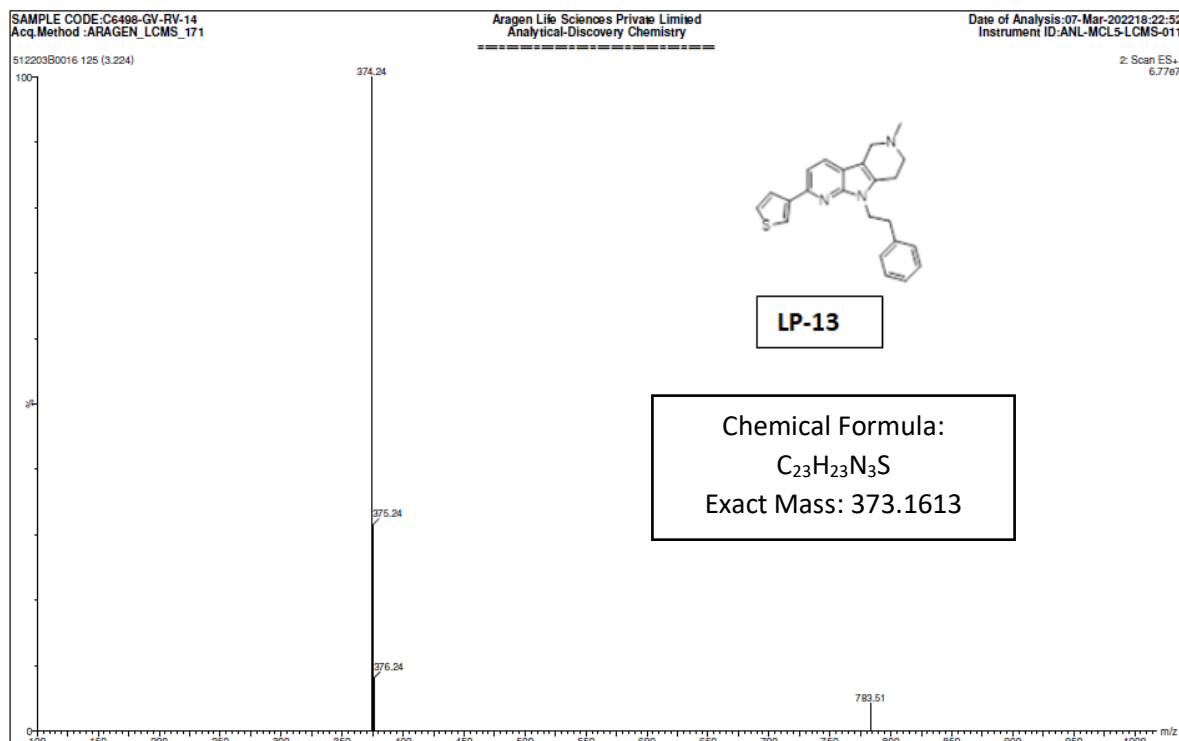

**MASS spectrum of 6-Methyl-9-phenethyl-2-(thiophen-3-yl)-6,7,8,9-tetrahydro-5H-pyrrolo[2,3-b:4,5-c']dipyridine (LP-13)**

## Single Mass Analysis

Tolerance = 820.0 PPM / DBE: min = -1.5, max = 50.0

Element prediction: Off

Number of isotope peaks used for i-FIT = 3

Monoisotopic Mass, Even Electron Ions

5 formula(e) evaluated with 1 results within limits (up to 50 best isotopic matches for each mass)

Elements Used:

C: 0-23 H: 0-24 N: 0-3 S: 0-1

C6498-14

Acq.method formic acid\_4min

Aragene Life sciences Private Limited

Analytical-Discovery Chemistry

09-Sep-2022

00:05:55

INSTRUMENT-ID:ANL-MCL5-LCMS-013

1: Scan ES+

1.32e+007

512209B4308 70 (1.793)

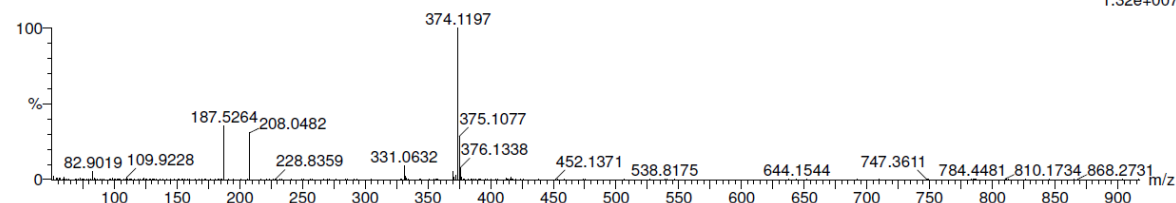

Minimum:

Maximum: 5.0 820.0 -1.5

| Mass     | Calc. Mass | mDa  | PPM  | DBE  | i-FIT | Norm | Conf(%) | Formula      |
|----------|------------|------|------|------|-------|------|---------|--------------|
| 374.1681 | 374.1691   | -1.0 | -2.7 | 13.5 | 40.5  | n/a  | n/a     | C23 H24 N3 S |

# Elemental composition report of 6-Methyl-9-phenethyl-2-(thiophen-3-yl)-6,7,8,9-tetrahydro-5H-pyrrolo[2,3-b:4,5-c']dipyridine (LP-13)

C6498-RV-15

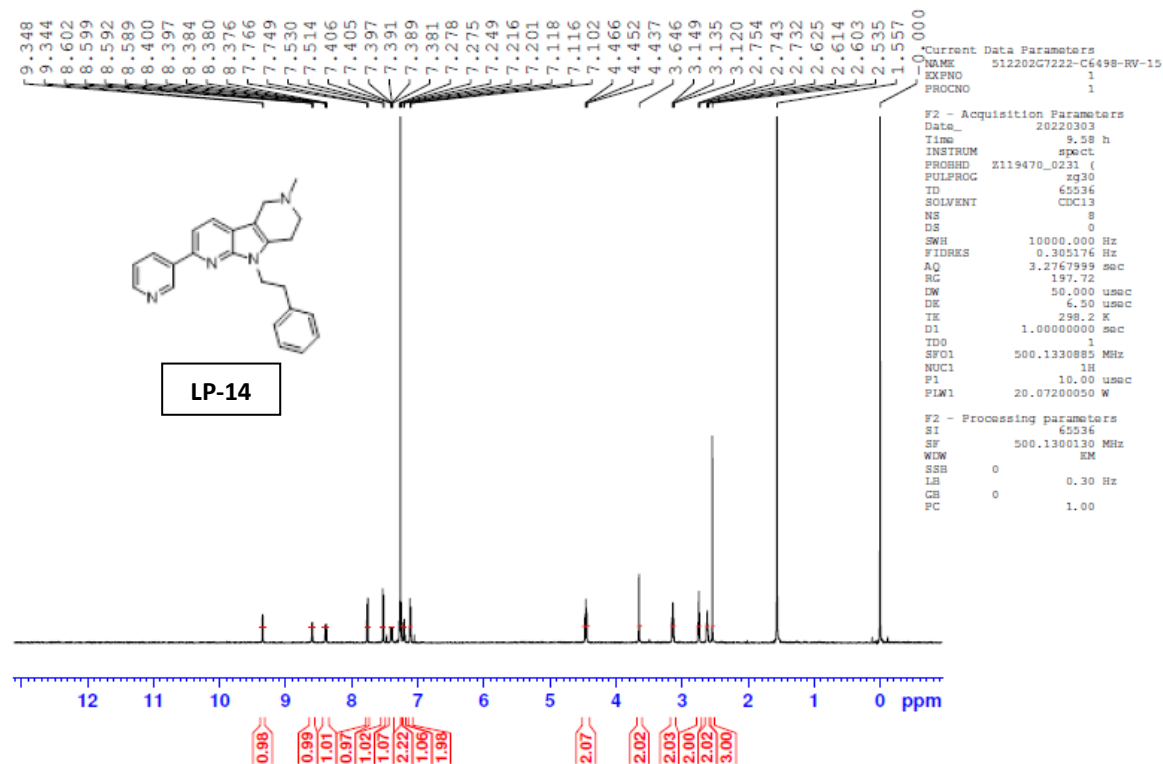

<sup>1</sup>H NMR spectrum of 6-Methyl-9-phenethyl-2-(pyridin-3-yl)-6,7,8,9-tetrahydro-5H-pyrrolo[2,3-b:4,5-c']dipyridine (LP-14) in CDCl<sub>3</sub> (500 MHz)

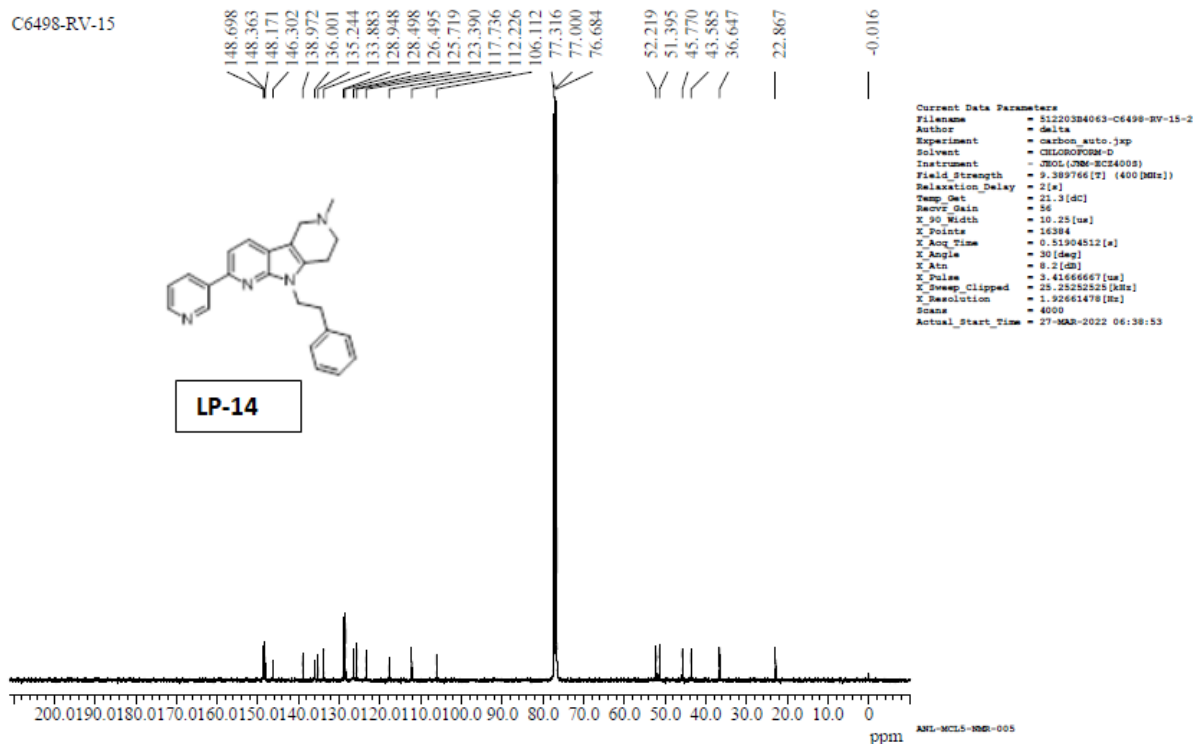

**$^{13}\text{C}$  NMR spectrum of 6-Methyl-9-phenethyl-2-(pyridin-3-yl)-6,7,8,9-tetrahydro-5H-pyrrolo[2,3-b:4,5-c']dipyridine (LP-14) in  $\text{CDCl}_3$  (100 MHz)**

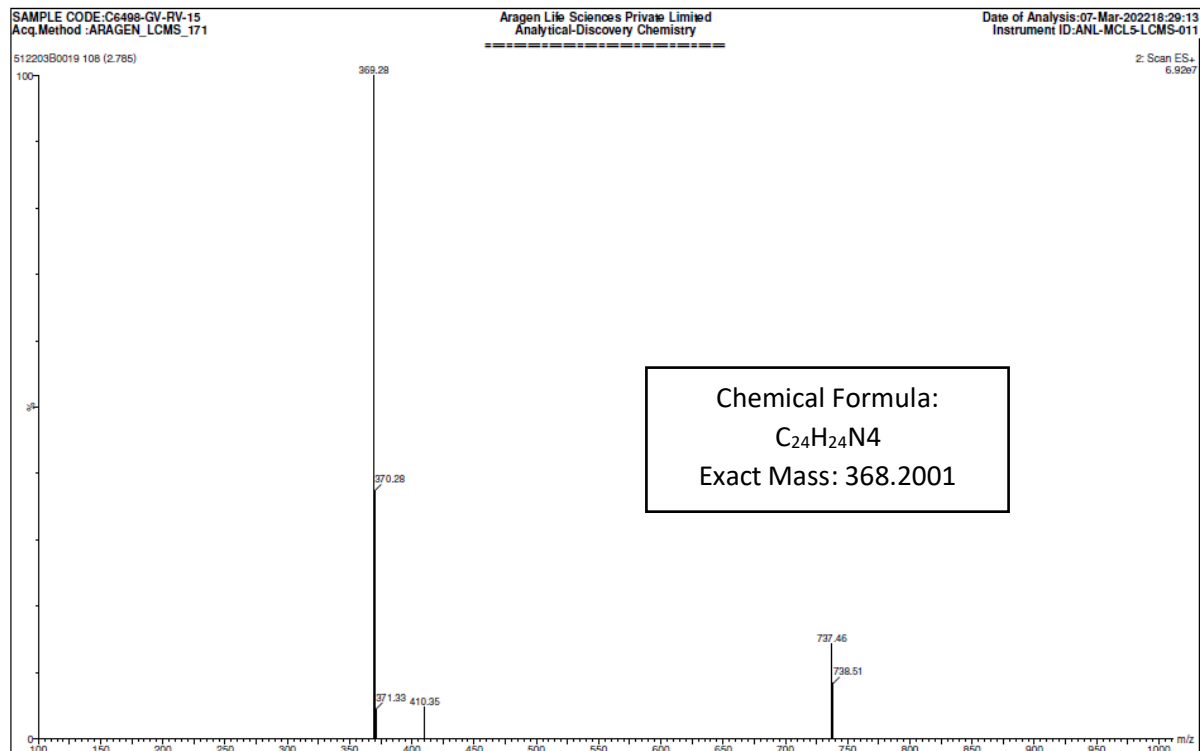

**MASS spectrum of 6-Methyl-9-phenethyl-2-(pyridin-3-yl)-6,7,8,9-tetrahydro-5H-pyrrolo[2,3-b:4,5-c']dipyridine (LP-14)**

## Single Mass Analysis

Tolerance = 820.0 PPM / DBE: min = -1.5, max = 50.0

Element prediction: Off

Number of isotope peaks used for i-FIT = 3

Monoisotopic Mass, Even Electron Ions

3 formula(e) evaluated with 1 results within limits (up to 50 best isotopic matches for each mass)

Elements Used:

C: 0-24 H: 0-25 N: 0-4

C6498-15

Acq.method formic acid\_4min

Aragene Life sciences Private Limited  
Analytical-Discovery Chemistry

09-Sep-2022

00:10:49

INSTRUMENT-ID:ANL-MCL5-LCMS-013

1: Scan ES+

2.24e+007

512209B4311 48 (1.224)

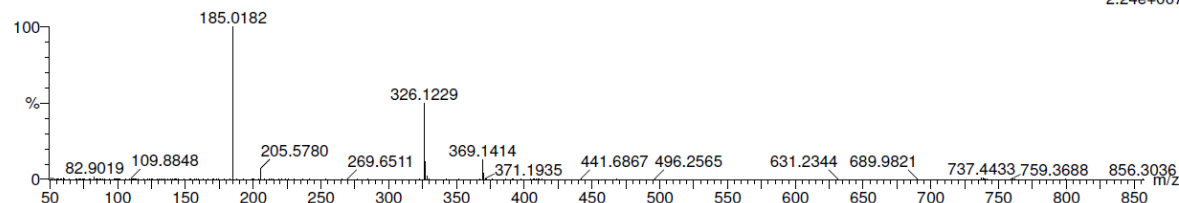

Minimum:

Maximum:

5.0 820.0 -1.5

50.0

| Mass     | Calc. Mass | mDa  | PPM  | DBE  | i-FIT | Norm | Conf(%) | Formula    |
|----------|------------|------|------|------|-------|------|---------|------------|
| 369.2069 | 369.2079   | -1.0 | -2.7 | 14.5 | 40.6  | n/a  | n/a     | C24 H25 N4 |

## Elemental composition report of 6-Methyl-9-phenethyl-2-(pyridin-3-yl)-6,7,8,9-tetrahydro-5H-pyrrolo[2,3-b:4,5-c']dipyridine (LP-14)

C6498-GV-RV-16

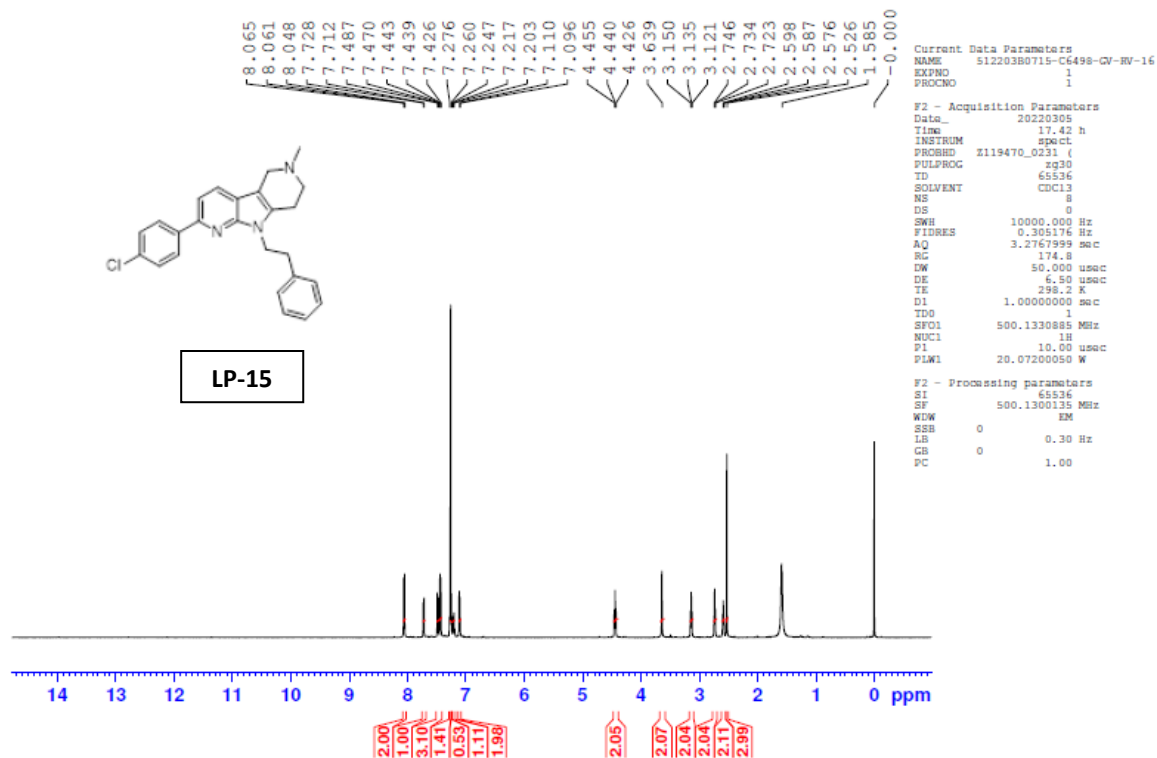

<sup>1</sup>H NMR spectrum of 2-(4-Chlorophenyl)-6-methyl-9-phenethyl-6,7,8,9-tetrahydro-5H-pyrrolo[2,3-b:4,5-c']dipyridine (LP-15) in CDCl<sub>3</sub> (500 MHz)

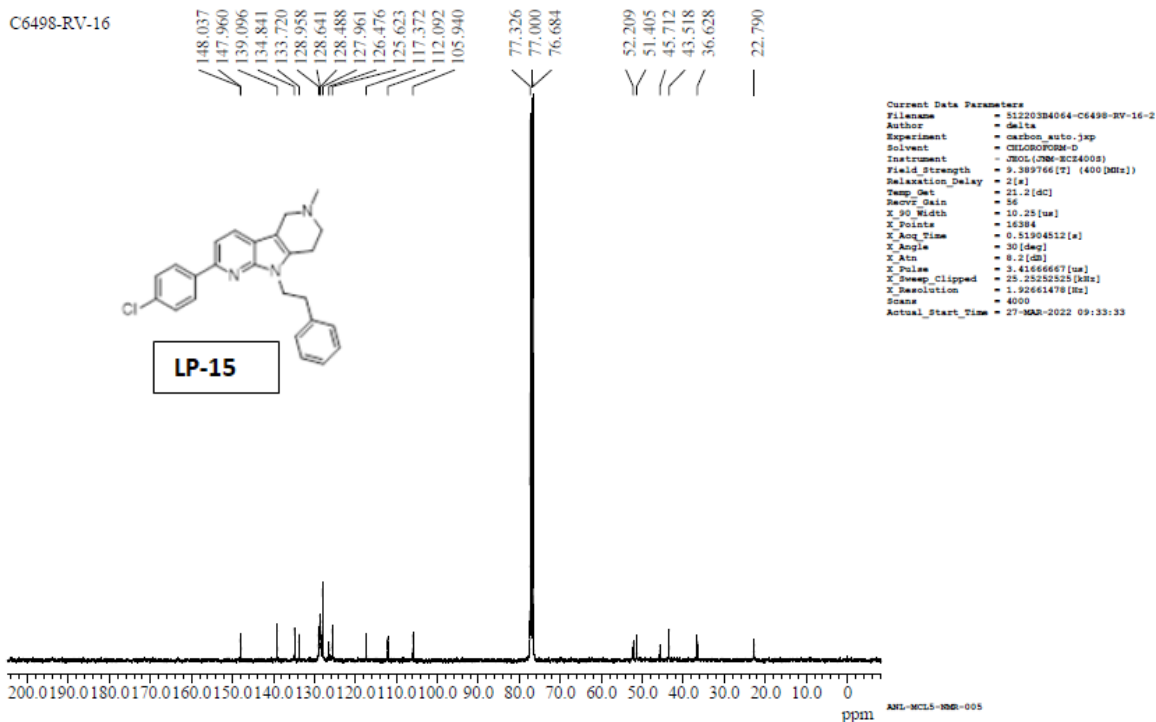

**<sup>13</sup>CNMR spectrum of 2-(4-Chlorophenyl)-6-methyl-9-phenethyl-6,7,8,9-tetrahydro-5H-pyrrolo[2,3-b:4,5-c']dipyridine (LP-15) in CDCl<sub>3</sub> (100 MHz)**

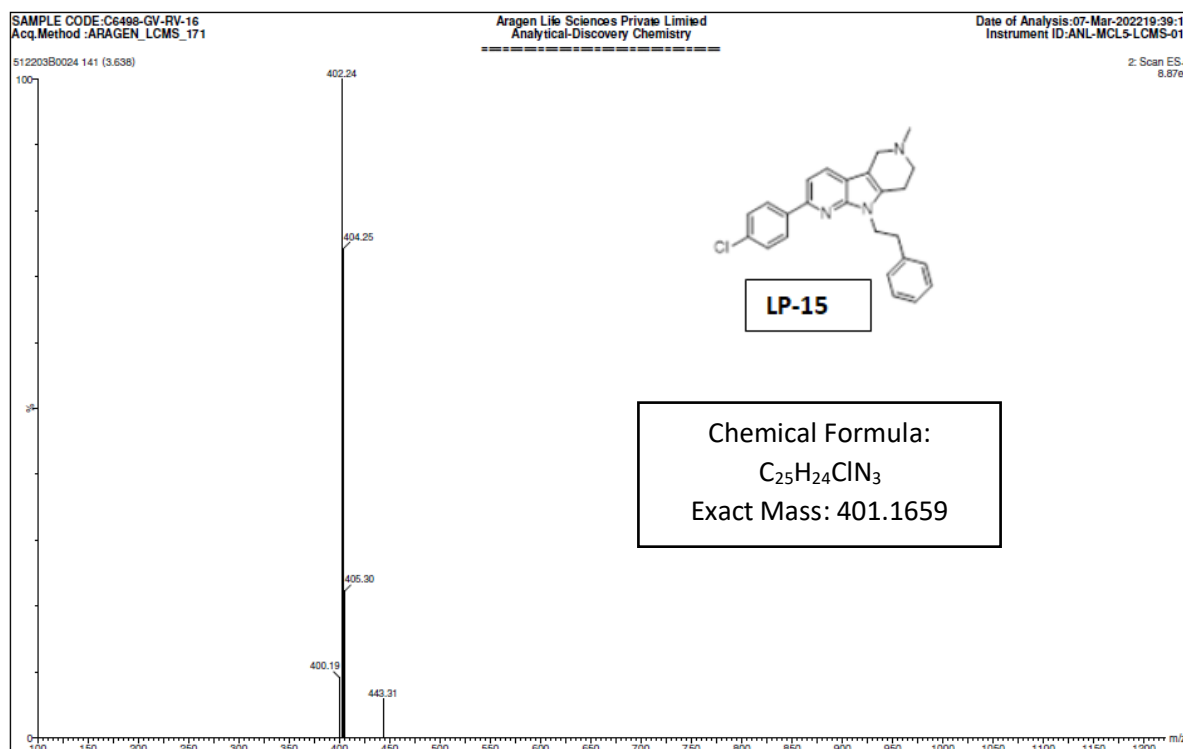

**MASS spectrum of 2-(4-Chlorophenyl)-6-methyl-9-phenethyl-6,7,8,9-tetrahydro-5H-pyrrolo[2,3-b:4,5-c']dipyridine (LP-15)**



## Elemental Composition Report

Page 1

### Single Mass Analysis

Tolerance = 820.0 PPM / DBE: min = -1.5, max = 50.0

Element prediction: Off

Number of isotope peaks used for i-FIT = 3

Monoisotopic Mass, Even Electron Ions

5 formula(e) evaluated with 1 results within limits (up to 50 best isotopic matches for each mass)

Elements Used:

C: 0-25 H: 0-25 N: 0-3 Cl: 0-1

C6498-16

Acq.method formic acid\_4min

Aragene Life sciences Private Limited  
Analytical-Discovery Chemistry

09-Sep-2022

00:15:44

INSTRUMENT-ID:ANL-MCL5-LCMS-013

1: Scan ES+

2.68e+007

512209B4312 75 (1.923)

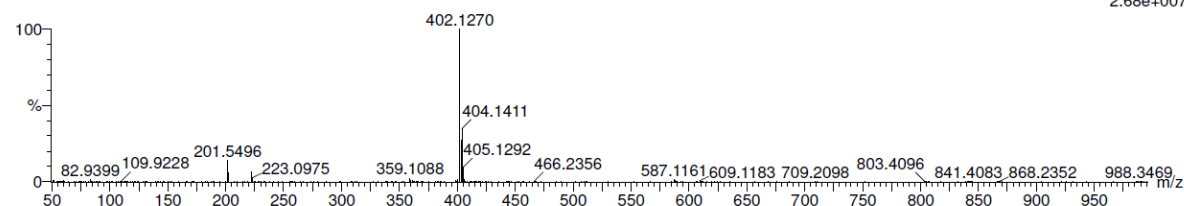

Minimum: -1.5  
Maximum: 5.0 820.0 50.0

| Mass     | Calc. Mass | mDa  | PPM  | DBE  | i-FIT | Norm | Conf(%) | Formula       |
|----------|------------|------|------|------|-------|------|---------|---------------|
| 402.1730 | 402.1737   | -0.7 | -1.7 | 14.5 | 44.3  | n/a  | n/a     | C25 H25 N3 Cl |

## Elemental composition report of 2-(4-Chlorophenyl)-6-methyl-9-phenethyl-6,7,8,9-tetrahydro-5H-pyrrolo[2,3-b:4,5-c']dipyridine (LP-15)

C6498-RV-17

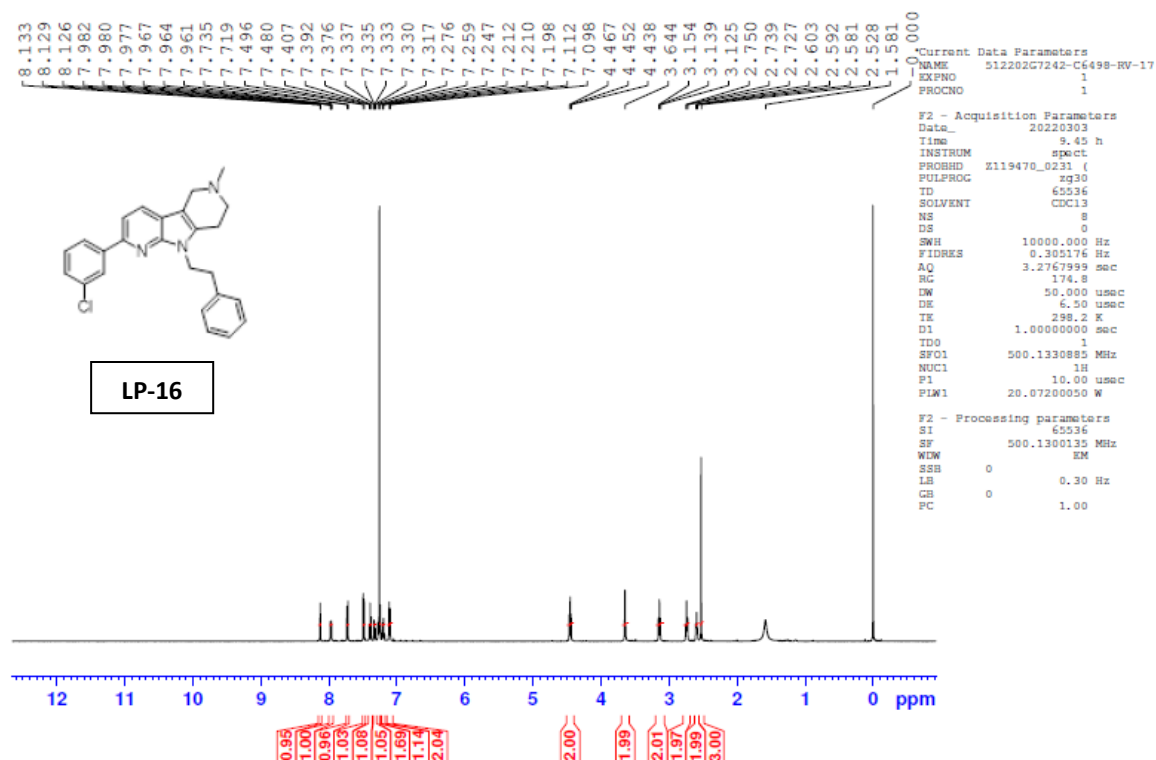

<sup>1</sup>H NMR spectrum of 2-(3-Chlorophenyl)-6-methyl-9-phenethyl-6,7,8,9-tetrahydro-5H-pyrrolo[2,3-b:4,5-c']dipyridine (LP-16) in CDCl<sub>3</sub> (500 MHz)

C6498-RV-17

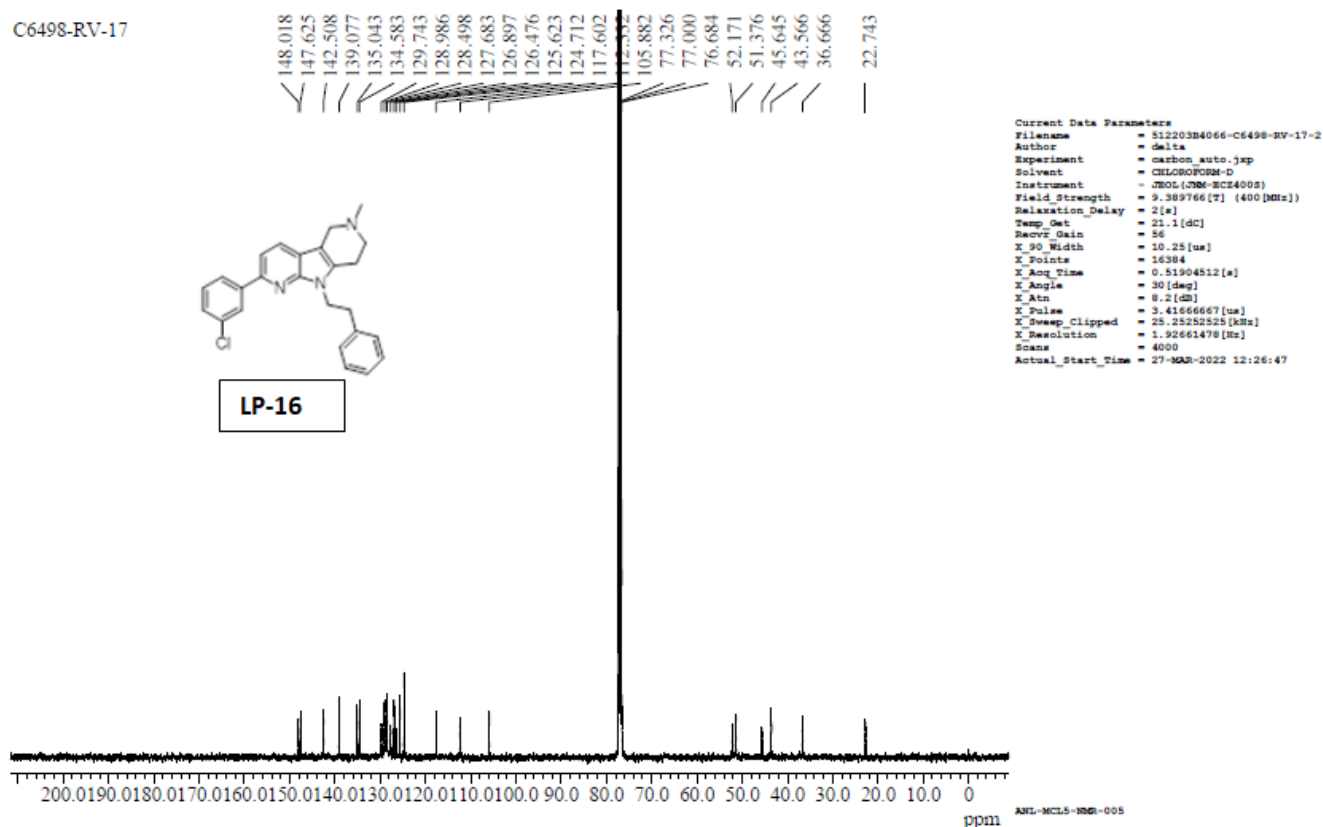

**<sup>13</sup>CNMR spectrum of 2-(3-Chlorophenyl)-6-methyl-9-phenethyl-6,7,8,9-tetrahydro-5H-pyrrolo[2,3-b:4,5-c']dipyridine (LP-16) in CDCl<sub>3</sub> (100 MHz)**

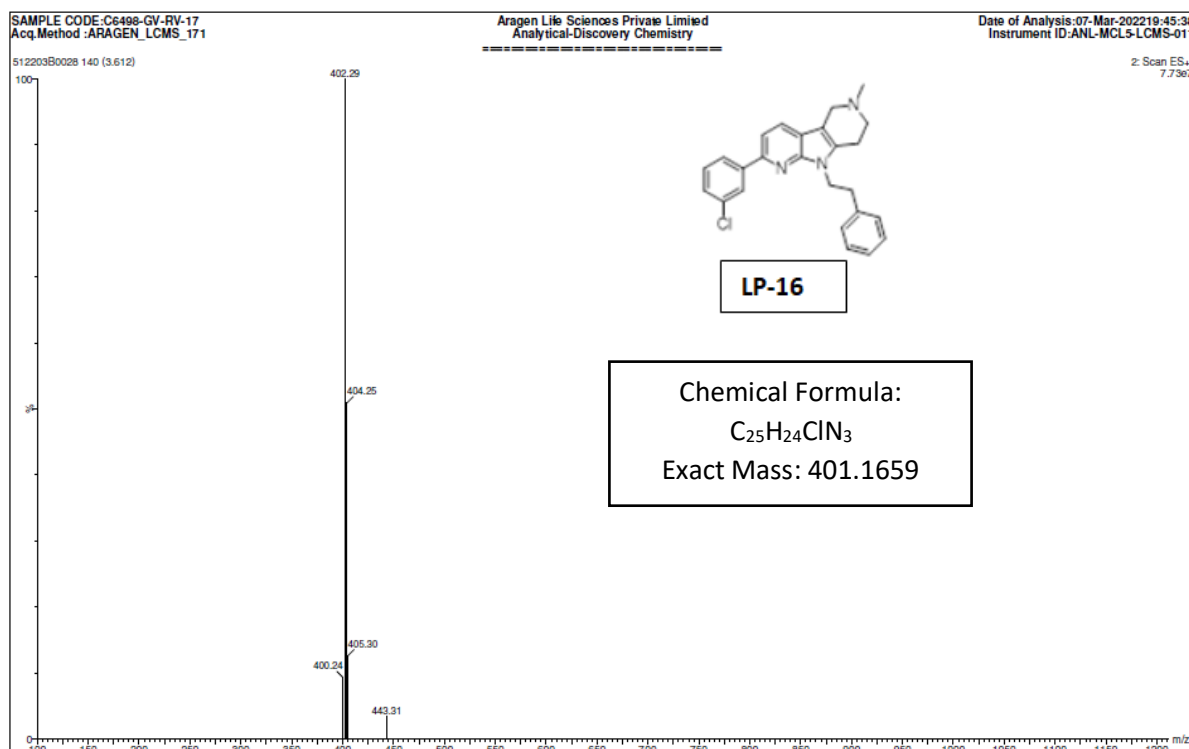

**MASS spectrum of 2-(3-Chlorophenyl)-6-methyl-9-phenethyl-6,7,8,9-tetrahydro-5H-pyrrolo[2,3-b:4,5-c']dipyridine (LP-16)**

## Single Mass Analysis

Tolerance = 820.0 PPM / DBE: min = -1.5, max = 50.0

Element prediction: Off

Number of isotope peaks used for i-FIT = 3

Monoisotopic Mass, Even Electron Ions

5 formula(e) evaluated with 1 results within limits (up to 50 best isotopic matches for each mass)

Elements Used:

C: 0-25 H: 0-25 N: 0-3 Cl: 0-1

C6498-17

Acq.method formic acid\_4min

Aragene Life sciences Private Limited  
Analytical-Discovery Chemistry

09-Sep-2022

00:20:40

INSTRUMENT-ID;ANL-MCL5-LCMS-013

1: Scan ES+

2.77e+007

512209B4313 75 (1.923)

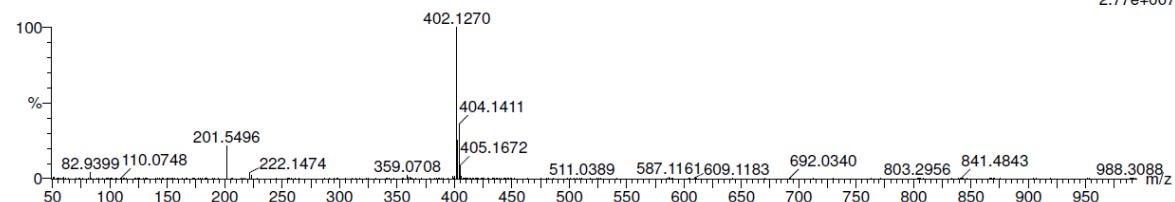

Minimum:

Maximum: 5.0 820.0 -1.5

| Mass     | Calc. Mass | mDa  | PPM  | DBE  | i-FIT | Norm | Conf (%) | Formula       |
|----------|------------|------|------|------|-------|------|----------|---------------|
| 402.1730 | 402.1737   | -0.7 | -1.7 | 14.5 | 47.4  | n/a  | n/a      | C25 H25 N3 Cl |

**Elemental composition report of 2-(3-Chlorophenyl)-6-methyl-9-phenethyl-6,7,8,9-tetrahydro-5H-pyrrolo[2,3-b:4,5-c']dipyridine (LP-16)**
